# Supplementary material for: A powerful synergistic effect for highly efficient diastereo- and enantioselective phase-transfer catalyzed conjugate additions
Source: Royal Society of Chemistry journal article supplement (doi:10.1039/c0cc04321d), 2010-11-29

# Electronic Supplementary Information (ESI)

## A Powerful Synergistic Effect for Highly Efficient Diastereo- and Enantioselective Phase-Transfer Catalyzed Conjugate Additions

Ming-Qing Hua, Lian Wang, Han-Feng Cui, Jing Nie, Xiao-Ling Zhang, Jun-An Ma\*

*Department of Chemistry, Tianjin University, Tianjin 30072, China*

*majun\_an68@tju.edu.cn*

### Contents

|                                                                |            |
|----------------------------------------------------------------|------------|
| <b>1. General Information</b>                                  | <b>S2</b>  |
| <b>2. Preparation of Catalysts</b>                             | <b>S3</b>  |
| <b>3. Optimizing of the Michael Addition Conditions</b>        | <b>S10</b> |
| <b>4. General Procedure for Catalyzed Michael Addition</b>     | <b>S12</b> |
| <b>5. Large-scale Synthesis and Recovery of Catalyst 6f</b>    | <b>S26</b> |
| <b>6. Synthetic Transformations of the Adducts</b>             | <b>S27</b> |
| <b>7. References</b>                                           | <b>S37</b> |
| <b>8. NMR Spectra and HPLC Charts for the Addition Adducts</b> | <b>S38</b> |
| <b>9. X-ray Analysis for the Amino Acid 14</b>                 | <b>S97</b> |

## 1. General information:

NMR spectra were recorded on Varian Mercury Plus 500 instruments at 500 MHz ( $^1\text{H}$  NMR), 125 MHz ( $^{13}\text{C}$  NMR) or Bruker Avance III 400 MHz ( $^1\text{H}$  NMR), 100 MHz ( $^{13}\text{C}$  NMR). Chemical shifts were reported in ppm down field from internal  $\text{Me}_4\text{Si}$ . MS were recorded on a VG ZAB-MS spectrometer with the ESI resource. Optical rotations were determined using an Autopol IV-T. IR spectra were recorded on an AVATAR 360 FT-IR spectrometer. HPLC analyses were carried out on a Hewlett Packard Model HP 1200 instrument.

## Materials:

Tetrahydrofuran (THF), diethyl ether, benzene and toluene were distilled from sodium/benzophenone prior to use;  $\text{CH}_2\text{Cl}_2$  were distilled from  $\text{CaH}_2$ . All purchased reagents were used without further purification. 4,4'-Bipiperidine dihydrochloride and 4,4'-Ethylenedipiperidine dihydrochloride were purchased from Aldrich chemicals, Inc. 1,3-Bis(4-piperidiny)propane was purchased from Alfa Aesar chemicals, Inc. 3,3-disubstituted (*S*)-binol-derived were synthesized according to the literatures.<sup>1</sup>

## 2. Preparation of catalysts:

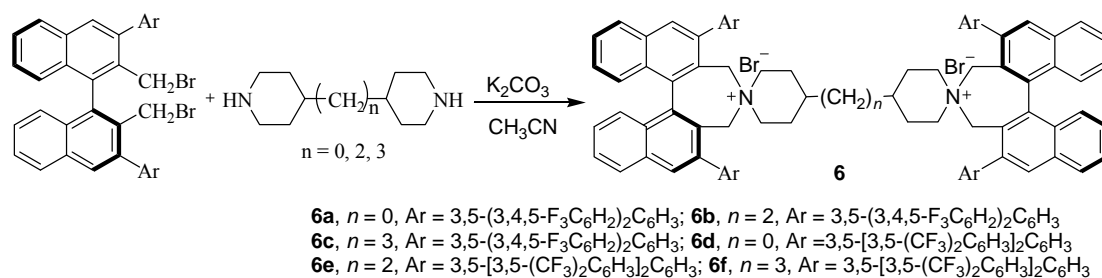

A mixture of 3,3-disubstituted (*S*)-binol-derived dibromide<sup>1</sup> (1.1 mmol), Bipiperidine (0.5 mmol) and K<sub>2</sub>CO<sub>3</sub> (207 mg, 1.5 mmol) in acetonitrile (10 mL) was heated to reflux, and stirring was maintained for 48 h. The resulting mixture was poured into water and extracted with CH<sub>2</sub>Cl<sub>2</sub>. The organic extracts were dried over Na<sub>2</sub>SO<sub>4</sub> and concentrated. The residue was purified by column chromatography on silica gel (MeOH/CH<sub>2</sub>Cl<sub>2</sub> = 1/50 as eluant) to furnish (*S,S*)-**6**.

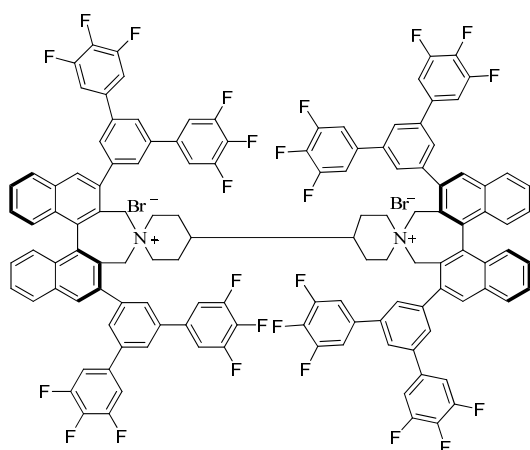

(*S,S*)-**6a**: 624.9 mg, 56% yield;  $[\alpha]_D^{20}$  -9.4 ( $c$  1.0, CH<sub>2</sub>Cl<sub>2</sub>); <sup>1</sup>H NMR (500 MHz, CDCl<sub>3</sub>)  $\delta$  0.76–0.78 (m, 2H), 1.06–1.07 (m, 2H), 1.13–1.16 (m, 2H), 1.24–1.26 (m, 4H), 2.77 (d,  $J = 10.5$  Hz, 4H), 3.20–3.21 (m, 2H), 3.60–3.74 (m, 4H), 3.86 (d,  $J = 12.5$  Hz, 2H), 4.45–4.48 (m, 2H), 5.36–5.39 (m, 2H), 7.29–7.32 (m, 8H), 7.42–7.49 (m, 20H), 7.68–7.73 (m, 8H), 7.90 (s, 4H), 8.08–8.12 (m, 8H); <sup>13</sup>C NMR (125 MHz, CDCl<sub>3</sub>)  $\delta$  152.5–152.6 (m), 152.3–152.4 (m), 150.1–150.1 (m), 149.8–149.9 (m), 140.9–141.1 (m), 140.4–140.6 (m), 139.9–140.1 (m), 139.5–139.6 (m), 138.9, 138.4, 138.3, 138.1, 138.0, 137.8, 136.3–136.8 (m), 135.2–135.3 (m), 134.5, 133.9, 133.6, 131.5, 130.9, 130.7, 130.5, 129.7, 129.0, 128.7, 128.5, 128.2, 127.9, 127.9, 127.6,

126.4, 126.3, 124.1, 123.5, 67.1, 62.8, 60.4, 58.1, 53.4, 52.5, 40.8, 34.4, 31.9, 29.7, 29.6, 29.3, 22.7, 21.0, 20.6, 18.3, 14.1; IR (KBr)  $\nu$  3398, 3053, 2934, 2858, 1616, 1585, 1526, 1456, 1400, 1345, 1242, 1044, 881, 852, 751, 663  $\text{cm}^{-1}$ ; MS (ESI)  $m/z$  1035.63 ( $[\text{M} - 2\text{Br}]^{2+}/2$ ,  $\text{C}_{126}\text{H}_{74}\text{F}_{24}\text{N}_2^{2+}$  requires 1035.95).

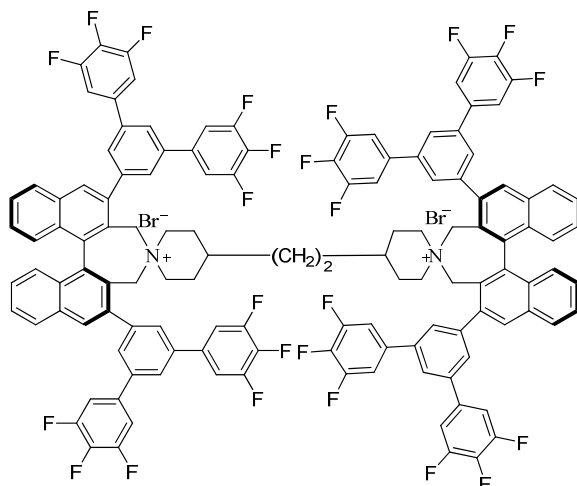

**(*S,S*)-6b**: 564.9 mg, 50% yield;  $[\alpha]_{\text{D}}^{20} +5.5$  ( $c$  1.0,  $\text{CH}_2\text{Cl}_2$ );  $^1\text{H}$  NMR (500 MHz,  $\text{CDCl}_3$ )  $\delta$  0.70–0.72 (m, 2H), 0.84–0.92 (m, 4H), 1.12–1.26 (m, 8H), 2.59–2.65 (m, 2H), 2.93–3.09 (m, 4H), 3.49–3.59 (m, 2H), 3.77–3.90 (m, 4H), 4.90–5.01 (m, 4H), 7.14–7.17 (m, 2H), 7.22–7.24 (m, 2H), 7.33 (t,  $J = 6.5$  Hz, 6H), 7.41–7.52 (m, 20H), 7.69–7.77 (m, 10H), 8.03 (d,  $J = 7.5$  Hz, 2H), 8.09 (d,  $J = 8.0$  Hz, 2H), 8.18 (d,  $J = 9.5$  Hz, 4H);  $^{13}\text{C}$  NMR (125 MHz,  $\text{CDCl}_3$  &  $\text{CD}_3\text{OD}$ )  $\delta$  152.6–152.7 (m), 152.4–152.5 (m), 150.6–150.7 (m), 150.4–150.5 (m), 141.3–141.4 (m), 140.7–140.8 (m), 140.6–140.7 (m), 140.4–140.5 (m), 139.9, 139.5, 138.8, 138.6, 138.1, 137.8, 136.5–136.7 (m), 135.9–136.1 (m), 134.2, 131.7, 131.2, 131.1, 131.0, 129.1, 129.0, 128.9, 128.7, 128.6, 128.5, 128.2, 128.1, 128.0, 128.0, 127.8, 127.6, 127.6, 126.0, 125.3, 123.9, 123.5, 63.0, 60.3, 57.4, 56.5, 53.6, 52.4, 32.0, 31.8, 30.1, 29.7, 29.7, 29.4, 26.5, 25.7, 22.7, 21.0, 17.6, 13.8; IR (KBr)  $\nu$  3324, 3049, 2929, 2863, 1616, 1527, 1457, 1400, 1345, 1243, 1044, 852, 748, 664  $\text{cm}^{-1}$ ; MS (ESI)  $m/z$  1049.73 ( $[\text{M} - 2\text{Br}]^{2+}/2$ ,  $\text{C}_{128}\text{H}_{78}\text{F}_{24}\text{N}_2^{2+}$  requires 1049.98).

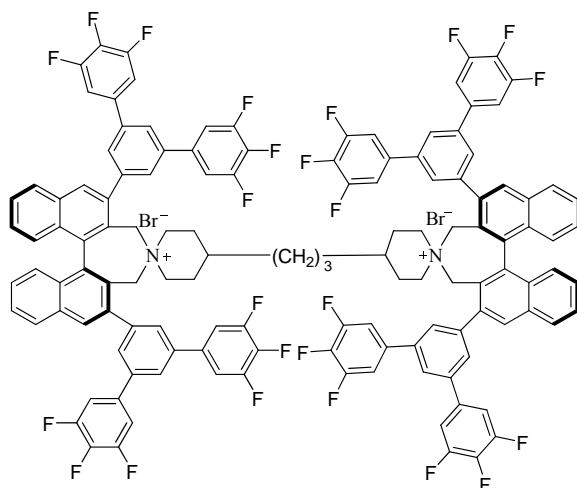

**(S,S)-6c**: 670.7 mg, 59% yield;  $[\alpha]_D^{20} +3.4$  (*c* 1.0, CH<sub>2</sub>Cl<sub>2</sub>); <sup>1</sup>H NMR (500 MHz, CDCl<sub>3</sub>)  $\delta$  0.52–0.55 (m, 2H), 0.67–0.69 (m, 2H), 0.84–0.89 (m, 4H), 1.25 (s, 4H), 1.41 (d, *J* = 11.0 Hz, 4H), 2.79 (d, *J* = 11.0 Hz, 2H), 3.17 (s, 4H), 3.49 (d, *J* = 13.0 Hz, 2H), 3.84–3.89 (m, 4H), 4.96 (t, *J* = 14.5 Hz, 4H), 7.25–7.28 (m, 2H), 7.31–7.49 (m, 24H), 7.54 (s, 2H), 7.62–7.70 (m, 8H), 7.77 (s, 2H), 7.83 (s, 2H), 8.06–8.10 (m, 4H), 8.15 (s, 2H), 8.20 (s, 2H); <sup>13</sup>C NMR (125 MHz, CDCl<sub>3</sub>)  $\delta$  152.4–152.6 (m), 152.2–152.3 (m), 150.4–150.6 (m), 150.2–150.3 (m), 141.3–141.4 (m), 140.7–140.9 (m), 140.4–140.6 (m), 139.9–140.1 (m), 139.6, 138.9, 138.6, 138.5, 138.0, 136.4–136.5 (m), 135.7–135.8 (m), 134.1, 133.2, 131.9, 131.8, 131.8, 131.3, 131.2, 131.0, 129.4, 129.3, 129.2, 129.2, 128.9, 128.8, 128.6, 128.4, 128.2, 128.0, 127.9, 127.8, 127.7, 125.9, 125.3, 124.0, 123.7, 63.0, 60.3, 57.9, 57.1, 53.8, 52.8, 35.5, 33.9, 33.5, 32.1, 30.7, 29.9, 29.8, 29.5, 26.5, 26.0, 25.6, 25.0, 22.9, 18.4, 14.3; IR (KBr)  $\nu$  3395, 3052, 2930, 2858, 1616, 1585, 1532, 1456, 1400, 1345, 1243, 1041, 852, 789, 664 cm<sup>-1</sup>; MS (ESI) *m/z* 1056.99 ([*M* – 2Br]<sup>2+</sup>/2, C<sub>129</sub>H<sub>80</sub>F<sub>24</sub>N<sub>2</sub><sup>2+</sup> requires 1056.99).

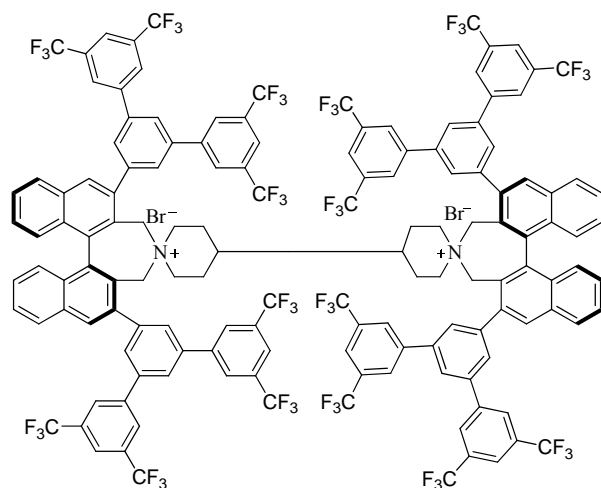

**(S,S)-6d**: 837.5 mg, 58% yield;  $[\alpha]_D^{20}$   $-18.0$  ( $c$  1.0,  $\text{CH}_2\text{Cl}_2$ );  $^1\text{H}$  NMR (500 MHz,  $\text{CDCl}_3$ )  $\delta$  0.95–0.97 (m, 2H), 1.28 (s, 8H), 2.30–2.36 (m, 2H), 2.87 (s, 4H), 3.24 (d,  $J$  = 10.5 Hz, 2H), 3.90–4.13 (m, 4H), 4.55–4.57 (m, 2H), 5.49–5.49 (m, 2H), 7.42 (s, 2H), 7.49–7.53 (m, 10H), 7.57–7.59 (m, 3H), 7.70–7.73 (m, 7H), 7.77–7.79 (m, 6H), 7.88–7.93 (m, 6H), 8.10–8.17 (m, 10H), 8.20–8.25 (m, 8H), 8.43 (s, 4H);  $^{13}\text{C}$  NMR (125 MHz,  $\text{CDCl}_3$ )  $\delta$  143.6, 142.6, 142.5, 141.4, 141.4, 141.2, 141.0, 140.3, 140.1, 139.8, 139.2, 138.7, 138.1, 134.1, 133.9, 132.5, 132.3, 132.2, 132.1, 132.0, 131.9, 131.8, 131.7, 131.7, 131.6, 131.5, 131.3, 131.1, 131.0, 130.8, 130.7, 130.0, 129.5–125.7 (m), 129.2, 129.1–129.2 (m), 129.0, 128.9, 128.8, 128.7, 128.5, 128.4, 128.2, 128.1, 127.9, 127.8, 127.7, 127.5, 127.0, 126.7, 125.5, 124.8, 124.6, 124.5, 124.3, 123.9, 122.6, 122.4, 122.4, 121.6, 121.5, 121.1, 120.5, 120.2, 60.6, 58.2, 55.3, 53.6, 33.6, 32.2, 30.5, 29.9, 29.9, 29.6, 24.7, 23.0, 22.9, 21.6, 18.4, 14.3; IR (KBr)  $\nu$  3349, 3067, 2926, 2863, 1618, 1588, 1464, 1368, 1279, 1178, 1136, 899, 844, 707, 683  $\text{cm}^{-1}$ ; MS (ESI)  $m/z$  1363.66 ( $[\text{M} - 2\text{Br}]^{2+}/2$ ,  $\text{C}_{142}\text{H}_{82}\text{F}_{48}\text{N}_2^{2+}$  requires 1364.05).

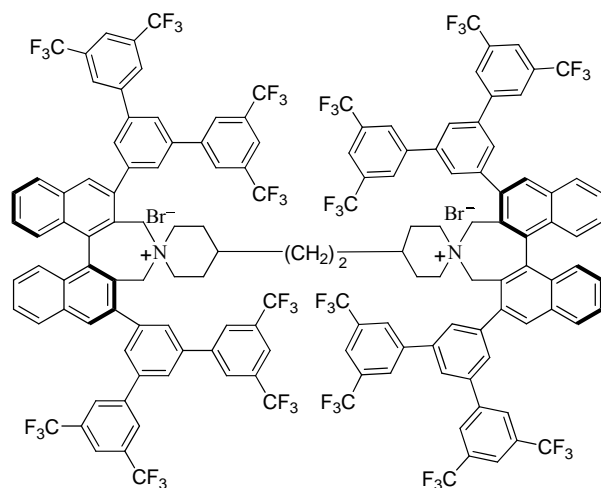

**(S,S)-6e**: 903.9 mg, 62% yield;  $[\alpha]_D^{20}$   $-2.1$  ( $c$  1.0,  $\text{CH}_2\text{Cl}_2$ );  $^1\text{H}$  NMR (500 MHz,  $\text{CDCl}_3$ )  $\delta$  0.62 (s, 4H), 0.97–0.99 (m, 2H), 1.25 (d,  $J = 11.5$  Hz, 8H), 2.73 (d,  $J = 11.5$  Hz, 2H), 3.14 (s, 4H), 3.30–3.36 (m, 2H), 3.60 (d,  $J = 13.0$  Hz, 2H), 3.83 (d,  $J = 13.0$  Hz, 2H), 4.67 (d,  $J = 8.5$  Hz, 2H), 5.01 (d,  $J = 12.5$  Hz, 2H), 7.50–7.54 (m, 10H), 7.74–7.79 (m, 10H), 7.85 (d,  $J = 14.5$  Hz, 4H), 7.91–7.94 (m, 8H), 8.02 (s, 4H), 8.08 (d,  $J = 5.5$  Hz, 8H), 8.14 (s, 6H), 8.20–8.23 (m, 4H), 8.36 (s, 2H);  $^{13}\text{C}$  NMR (125 MHz,  $\text{CDCl}_3$  &  $\text{CD}_3\text{OD}$ )  $\delta$  146.5, 146.4, 145.9, 145.7, 144.7, 144.7, 144.6, 143.1, 143.0, 142.0, 142.0, 138.2, 138.1, 137.2, 137.1, 136.9, 136.8, 136.7, 136.6, 136.5, 136.4, 136.3, 136.2, 136.1, 135.9, 135.9, 135.6–135.8 (m), 135.3–135.4 (m), 135.2, 135.1, 133.5–133.7 (m), 133.0–133.1 (m), 132.9, 132.4, 132.2, 131.9, 131.7, 131.6, 131.4, 131.1, 130.6, 130.5, 130.4, 130.0, 128.5, 128.4, 128.3, 128.2, 127.4, 127.3, 126.3–126.4 (m), 126.3, 126.2, 126.1, 126.0, 125.5–125.6 (m), 124.1, 124.0, 123.9, 123.9, 72.2, 71.7, 66.9, 64.1, 63.8, 59.8, 56.3, 36.0, 34.6, 33.7, 33.4, 31.4, 30.2, 30.2, 29.7, 26.7, 22.6, 18.8, 18.0; IR (KBr)  $\nu$  3349, 3047, 2929, 2858, 1618, 1588, 1464, 1368, 1279, 1170, 1136, 882, 844, 707, 683  $\text{cm}^{-1}$ ; MS (ESI)  $m/z$  1378.07 ( $[\text{M} - 2\text{Br}]^{2+}/2$ ,  $\text{C}_{144}\text{H}_{86}\text{F}_{48}\text{N}_2^{2+}$  requires 1378.08).

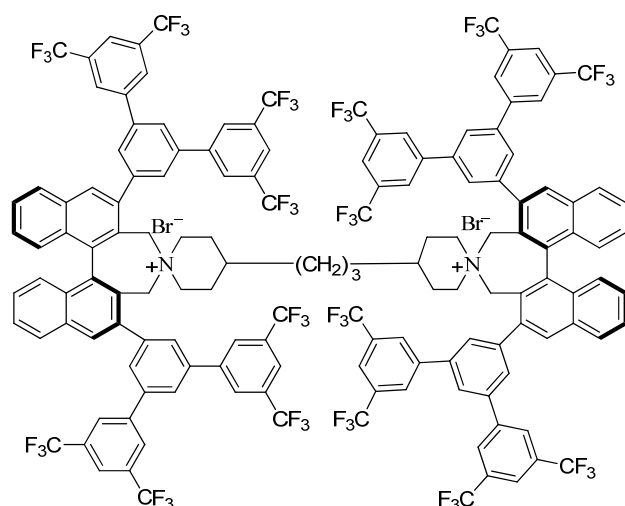

**(S,S)-6f:** 937.6 mg, 64% yield;  $[\alpha]_D^{20} +4.8$  ( $c$  1.0,  $\text{CH}_2\text{Cl}_2$ );  $^1\text{H}$  NMR (500 MHz,  $\text{CDCl}_3$ )  $\delta$  0.47–0.49 (m, 2H), 0.66–0.68 (m, 2H), 0.78–0.80 (m, 2H), 0.84–0.94 (m, 2H), 1.14 (s, 2H), 1.26 (s, 2H), 1.36 (s, 2H), 1.48 (d,  $J = 13.0$  Hz, 2H), 2.96–3.02 (m, 4H), 3.23 (d,  $J = 11.0$  Hz, 2H), 3.45 (t,  $J = 11.5$  Hz, 2H), 3.60–3.64 (m, 2H), 4.03 (d,  $J = 13.5$  Hz, 2H), 4.79 (d,  $J = 13.0$  Hz, 2H), 5.07 (d,  $J = 13.0$  Hz, 2H), 7.49–7.57 (m, 8H), 7.61 (s, 2H), 7.72–7.76 (m, 4H), 7.86 (t,  $J = 10.0$  Hz, 8H), 7.95 (d,  $J = 12.0$  Hz, 6H), 7.99 (s, 2H), 8.05 (s, 6H), 8.17 (d,  $J = 7.5$  Hz, 8H), 8.21 (d,  $J = 13.0$  Hz, 8H), 8.27 (s, 2H), 8.31 (s, 2H);  $^{13}\text{C}$  NMR (125 MHz,  $\text{CDCl}_3$  &  $\text{CD}_3\text{OD}$ )  $\delta$  142.4, 142.0, 141.9, 141.9, 141.8, 141.2, 141.0, 140.6, 140.5, 139.3, 139.0, 138.2, 138.2, 134.3, 134.2, 133.2, 130.0, 132.9, 132.7, 132.6, 132.5, 132.4–132.5 (m), 132.2–132.3 (m), 132.1, 131.9–132.0 (m), 131.7, 131.3, 131.1, 130.6, 130.2, 130.0–130.1 (m), 129.9, 129.2, 129.1, 129.0, 129.0, 128.9, 128.9, 128.6, 128.3, 128.2, 128.2, 128.0, 127.8, 127.7, 127.6, 126.9, 126.7, 126.6, 126.5, 126.2, 125.4, 124.6, 124.5, 124.3, 123.7, 123.4, 122.4, 122.3, 122.2–122.3 (m), 122.2, 121.7–121.8 (m), 120.2, 120.1, 120.0, 63.1, 60.3, 57.7, 56.8, 53.7, 52.6, 35.5, 32.0, 30.9, 29.8, 29.8, 29.5, 26.9, 25.5, 22.8, 22.6, 20.8, 17.9, 14.1; IR (KBr)  $\nu$  3339, 3057, 2934, 2893, 1623, 1598, 1460, 1368, 1279, 1176, 1132, 883, 844, 702, 684  $\text{cm}^{-1}$ ; MS (ESI)  $m/z$  1385.07 ( $[\text{M} - 2\text{Br}]^{2+}/2$ ,  $\text{C}_{145}\text{H}_{88}\text{F}_{48}\text{N}_2^{2+}$  requires 1385.09).



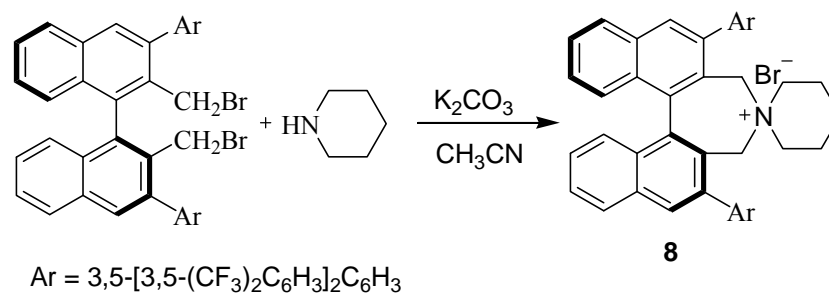

A mixture of 3,3-disubstituted (*S*)-binol-derived dibromide<sup>1</sup> (792.5 mg, 0.55 mmol), piperidine (42.6 mg, 0.5 mmol) and K<sub>2</sub>CO<sub>3</sub> (103.7 mg, 0.75 mmol) in acetonitrile (5 mL) was heated to reflux, and stirring was maintained for 12 h. The resulting mixture was poured into water and extracted with CH<sub>2</sub>Cl<sub>2</sub>. The organic extracts were dried over Na<sub>2</sub>SO<sub>4</sub> and concentrated. The residue was purified by column chromatography on silica gel (MeOH/CH<sub>2</sub>Cl<sub>2</sub> = 1/30 as eluant) to furnish (*S*)-**8**.

(*S*)-**8**: 540.5 mg, 75% yield. [ $\alpha$ ]<sub>D</sub><sup>20</sup> -0.6 (*c* 1.0, CH<sub>2</sub>Cl<sub>2</sub>); <sup>1</sup>H NMR (400 MHz, CDCl<sub>3</sub>)  $\delta$  0.87–0.95 (m, 2H), 1.36–1.45 (m, 2H), 1.57 (s, 2H), 3.35 (s, 2H), 3.75 (d, *J* = 13.2 Hz, 2H), 3.95 (s, 2H), 5.37 (d, *J* = 13.2 Hz, 2H), 7.49–7.57 (m, 4H), 7.67 (s, 2H), 7.74 (t, *J* = 7.2 Hz, 2H), 7.88 (d, *J* = 7.2 Hz, 4H), 7.94 (d, *J* = 8.8 Hz, 4H), 8.14–8.23 (m, 12H); <sup>13</sup>C NMR (100 MHz, CDCl<sub>3</sub>)  $\delta$  141.9, 141.8, 141.2, 141.0, 140.8, 138.9, 138.4, 133.9, 133.1, 132.7, 132.4, 132.1, 131.7, 131.6, 131.4–131.5 (m), 130.9, 129.6, 128.8, 128.5, 128.1, 127.5, 127.3, 126.7, 124.6, 123.7, 121.9–122.0 (m), 121.8, 119.1, 60.3, 58.1, 58.0, 57.8, 29.7, 20.3, 19.7; IR (KBr)  $\nu$  3666, 3349, 3062, 2939, 1618, 1587, 1500, 1469, 1368, 1280, 1175, 1129, 1024, 885, 844, 742, 706 cm<sup>-1</sup>; MS (ESI) *m/z* 1364.52 ([M - Br]<sup>+</sup>, C<sub>71</sub>H<sub>42</sub>F<sub>24</sub>N<sup>+</sup> requires 1365.06).

### 3. Optimizing of the Michael Addition Conditions:<sup>a</sup>

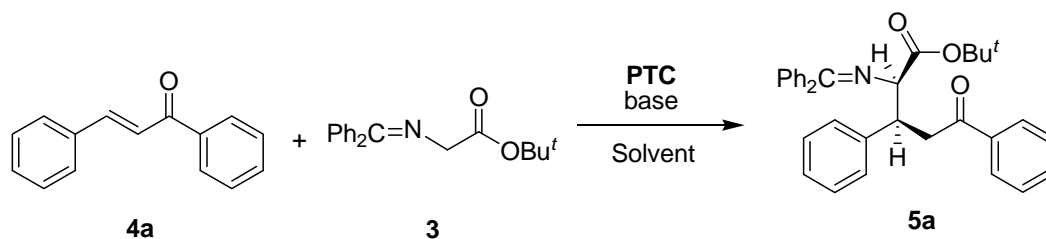

PTC

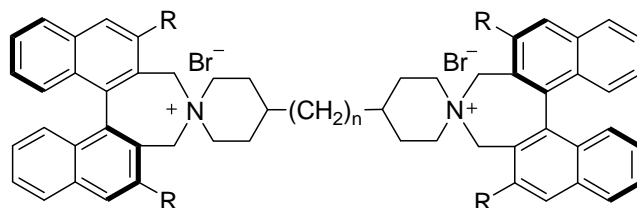

**Cat-1**,  $n = 0$ ,  $R = \text{H}$ ; **Cat-2**,  $n = 2$ ,  $R = \text{H}$ ; **Cat-3**,  $n = 3$ ,  $R = \text{H}$ ;  
**Cat-4**,  $n = 0$ ,  $R = \text{C}_6\text{H}_5$ ; **Cat-5**,  $n = 2$ ,  $R = \text{C}_6\text{H}_5$ ; **Cat-6**,  $n = 3$ ,  $R = \text{C}_6\text{H}_5$ ;  
**Cat-7**,  $n = 0$ ,  $R = 3,4,5\text{-F}_3\text{C}_6\text{H}_2$ ; **Cat-8**,  $n = 2$ ,  $R = 3,4,5\text{-F}_3\text{C}_6\text{H}_2$ ;  
**Cat-9**,  $n = 3$ ,  $R = 3,4,5\text{-F}_3\text{C}_6\text{H}_2$ ; **7a**,  $n = 0$ ,  $R = 3,5\text{-(CF}_3)_2\text{C}_6\text{H}_3$ ;  
**Cat-10**,  $n = 2$ ,  $R = 3,5\text{-(CF}_3)_2\text{C}_6\text{H}_3$ ; **7b**,  $n = 3$ ,  $R = 3,5\text{-(CF}_3)_2\text{C}_6\text{H}_3$ .  
**6a**,  $n = 0$ ,  $\text{Ar} = 3,5\text{-(3,4,5-F}_3\text{C}_6\text{H}_2)_2\text{C}_6\text{H}_3$ ; **6b**,  $n = 2$ ,  $\text{Ar} = 3,5\text{-(3,4,5-F}_3\text{C}_6\text{H}_2)_2\text{C}_6\text{H}_3$   
**6c**,  $n = 3$ ,  $\text{Ar} = 3,5\text{-(3,4,5-F}_3\text{C}_6\text{H}_2)_2\text{C}_6\text{H}_3$ ; **6d**,  $n = 0$ ,  $\text{Ar} = 3,5\text{-[3,5-(CF}_3)_2\text{C}_6\text{H}_3]_2\text{C}_6\text{H}_3$   
**6e**,  $n = 2$ ,  $\text{Ar} = 3,5\text{-[3,5-(CF}_3)_2\text{C}_6\text{H}_3]_2\text{C}_6\text{H}_3$ ; **6f**,  $n = 3$ ,  $\text{Ar} = 3,5\text{-[3,5-(CF}_3)_2\text{C}_6\text{H}_3]_2\text{C}_6\text{H}_3$

| entry | Catalyst<br>(mol %) | temp<br>(°C) | solvent                         | base                                    | time<br>(h) | yield<br>(%) <sup>f</sup> | er <sup>g</sup> | dr <sup>h</sup> |
|-------|---------------------|--------------|---------------------------------|-----------------------------------------|-------------|---------------------------|-----------------|-----------------|
| 1     | <b>Cat-1</b> (2)    | 10           | toluene                         | Cs <sub>2</sub> CO <sub>3</sub> (2eq)   | 36          | 85                        | 56.5:43.5       | 97:3            |
| 2     | <b>Cat-2</b> (2)    | 10           | toluene                         | Cs <sub>2</sub> CO <sub>3</sub> (2eq)   | 36          | 87                        | 56.5:43.5       | 97:3            |
| 3     | <b>Cat-3</b> (2)    | 10           | toluene                         | Cs <sub>2</sub> CO <sub>3</sub> (2eq)   | 36          | 84                        | 54.5:45.5       | 97:3            |
| 4     | <b>Cat-4</b> (1)    | 10           | toluene                         | Cs <sub>2</sub> CO <sub>3</sub> (2eq)   | 48          | 95                        | 66.5:33.5       | 97:3            |
| 5     | <b>Cat-5</b> (1)    | 10           | toluene                         | Cs <sub>2</sub> CO <sub>3</sub> (2eq)   | 48          | 98                        | 72:28           | 95:5            |
| 6     | <b>Cat-6</b> (1)    | 10           | toluene                         | Cs <sub>2</sub> CO <sub>3</sub> (2eq)   | 48          | 92                        | 61.5:38.5       | 97:3            |
| 7     | <b>Cat-7</b> (1)    | 10           | toluene                         | Cs <sub>2</sub> CO <sub>3</sub> (2eq)   | 48          | 86                        | 65:35           | 95:5            |
| 8     | <b>Cat-8</b> (1)    | 10           | toluene                         | Cs <sub>2</sub> CO <sub>3</sub> (2eq)   | 48          | 92                        | 72.5:27.5       | 96:4            |
| 9     | <b>Cat-9</b> (1)    | 10           | toluene                         | Cs <sub>2</sub> CO <sub>3</sub> (2eq)   | 48          | 92                        | 75:25           | 96:4            |
| 10    | <b>7a</b> (1)       | 10           | toluene                         | Cs <sub>2</sub> CO <sub>3</sub> (2eq)   | 48          | 98                        | 74.5:25.5       | 98:2            |
| 11    | <b>Cat-10</b> (1)   | 10           | toluene                         | Cs <sub>2</sub> CO <sub>3</sub> (2eq)   | 48          | 90                        | 74:26           | 98:2            |
| 12    | <b>7b</b> (1)       | 10           | toluene                         | Cs <sub>2</sub> CO <sub>3</sub> (2eq)   | 48          | 85                        | 72.5:27.5       | 97:3            |
| 13    | <b>6a</b> (1)       | 10           | toluene                         | Cs <sub>2</sub> CO <sub>3</sub> (0.5eq) | 48          | 88                        | 69:31           | 97:3            |
| 14    | <b>6b</b> (1)       | 10           | toluene                         | Cs <sub>2</sub> CO <sub>3</sub> (0.5eq) | 48          | 98                        | 90:10           | 97:3            |
| 15    | <b>6c</b> (1)       | 10           | toluene                         | Cs <sub>2</sub> CO <sub>3</sub> (0.5eq) | 48          | 98                        | 85:15           | 97:3            |
| 16    | <b>6d</b> (1)       | 10           | toluene                         | Cs <sub>2</sub> CO <sub>3</sub> (0.5eq) | 48          | 95                        | 86.5:13.5       | 97:3            |
| 17    | <b>6e</b> (1)       | 10           | toluene                         | Cs <sub>2</sub> CO <sub>3</sub> (0.5eq) | 48          | 96                        | 83.5:16.5       | 97:3            |
| 18    | <b>6f</b> (1)       | 10           | toluene                         | Cs <sub>2</sub> CO <sub>3</sub> (0.5eq) | 48          | 98                        | 94:6            | 96:4            |
| 19    | <b>6f</b> (1)       | 10           | xylene                          | Cs <sub>2</sub> CO <sub>3</sub> (0.5eq) | 48          | 98                        | 95:5            | 98:2            |
| 20    | <b>6f</b> (1)       | 10           | CH <sub>2</sub> Cl <sub>2</sub> | Cs <sub>2</sub> CO <sub>3</sub> (0.5eq) | 48          | 96                        | 70:30           | 96:4            |

|                 |                 |           |                   |                                            |           |           |                 |             |
|-----------------|-----------------|-----------|-------------------|--------------------------------------------|-----------|-----------|-----------------|-------------|
| 21              | <b>6f</b> (1)   | 10        | THF               | Cs <sub>2</sub> CO <sub>3</sub> (0.5eq)    | 48        | 90        | 79.5:20.5       | 96:4        |
| 22              | <b>6f</b> (1)   | 10        | Et <sub>2</sub> O | Cs <sub>2</sub> CO <sub>3</sub> (0.5eq)    | 48        | 93        | 91:9            | 98:2        |
| 23              | <b>6f</b> (1)   | 10        | benzene           | Cs <sub>2</sub> CO <sub>3</sub> (0.5eq)    | 48        | 98        | 86:14           | 97:3        |
| 24              | <b>6f</b> (1)   | 10        | chlorobenzene     | Cs <sub>2</sub> CO <sub>3</sub> (0.5eq)    | 48        | 98        | 83:17           | 97:3        |
| 25              | <b>6f</b> (1)   | 10        | fluorobenzene     | Cs <sub>2</sub> CO <sub>3</sub> (0.5eq)    | 48        | 98        | 93:7            | 97:3        |
| 26 <sup>b</sup> | <b>6f</b> (1)   | 10        | toluene           | Cs <sub>2</sub> CO <sub>3</sub> (0.5eq)    | 48        | 92        | 92:8            | 97:3        |
| 27              | <b>6f</b> (1)   | 10        | anisole           | Cs <sub>2</sub> CO <sub>3</sub> (0.5eq)    | 48        | 96        | 85:15           | 97:3        |
| 28              | <b>6f</b> (1)   | 10        | mesitylene        | Cs <sub>2</sub> CO <sub>3</sub> (0.5eq)    | 48        | 94        | 85:15           | 97:3        |
| 29              | <b>6f</b> (1)   | 10        | <i>p</i> -xylene  | Cs <sub>2</sub> CO <sub>3</sub> (0.5eq)    | 48        | 93        | 85:15           | 97:3        |
| 30              | <b>6f</b> (1)   | 10        | <i>m</i> -xylene  | Cs <sub>2</sub> CO <sub>3</sub> (0.5eq)    | 48        | 97        | 81.5:18.5       | 96:4        |
| 31              | <b>6f</b> (1)   | 10        | <i>o</i> -xylene  | Cs <sub>2</sub> CO <sub>3</sub> (0.5eq)    | 48        | 95        | 81:19           | 97:3        |
| 32 <sup>c</sup> | <b>6f</b> (1)   | 10        | xylene            | Cs <sub>2</sub> CO <sub>3</sub> (0.5eq)    | 48        | 98        | 92:8            | 97:3        |
| 33 <sup>d</sup> | <b>6f</b> (1)   | 10        | xylene            | Cs <sub>2</sub> CO <sub>3</sub> (0.5eq)    | 48        | 98        | 89.5:10.5       | 97:3        |
| 34              | <b>6f</b> (0.5) | 10        | xylene            | Cs <sub>2</sub> CO <sub>3</sub> (0.5eq)    | 60        | 98        | 85:15           | 97:3        |
| 35 <sup>e</sup> | <b>6f</b> (1)   | 10        | xylene            | Cs <sub>2</sub> CO <sub>3</sub> (0.5eq)    | 72        | 82        | 94:6            | 98:2        |
| 36              | <b>6f</b> (1)   | 10        | xylene            | K <sub>2</sub> CO <sub>3</sub> (2eq)       | 72        | 72        | 96.5:3.5        | 96:4        |
| 37              | <b>6f</b> (1)   | 10        | xylene            | CsOH(1eq)                                  | 40        | 63        | 50:50           | 86:14       |
| 38              | <b>6f</b> (1)   | 10        | xylene            | NaOH(1eq)                                  | 36        | 96        | 50:50           | 82:18       |
| 39              | <b>6f</b> (1)   | 10        | xylene            | Na <sub>2</sub> CO <sub>3</sub> (2eq)      | 48        | <5        | \               | \           |
| 40              | <b>6f</b> (2)   | 10        | xylene            | Cs <sub>2</sub> CO <sub>3</sub> (0.5eq)    | 36        | 96        | 95:5            | 97:3        |
| 41              | <b>6f</b> (2)   | 10        | xylene            | K <sub>2</sub> CO <sub>3</sub> (2eq)       | 72        | 83        | 96:4            | 95:5        |
| 42              | <b>6f</b> (1)   | 10        | xylene            | Cs <sub>2</sub> CO <sub>3</sub> (0.2eq)    | 48        | 89        | 95:5            | 97:3        |
| 43              | <b>6f</b> (1)   | 10        | xylene            | Cs <sub>2</sub> CO <sub>3</sub> (0.1eq)    | 48        | 69        | 95:5            | 96:4        |
| 44              | <b>6f</b> (1)   | 10        | xylene            | Cs <sub>2</sub> CO <sub>3</sub> (0.05eq)   | 48        | 85        | 95:5            | 97:3        |
| 45              | <b>6f</b> (1)   | 0         | xylene            | Cs <sub>2</sub> CO <sub>3</sub> (0.5eq)    | 96        | 72        | 91:9            | 98:2        |
| 46              | <b>6f</b> (1)   | 25        | xylene            | Cs <sub>2</sub> CO <sub>3</sub> (0.5eq)    | 24        | 98        | 95.5:4.5        | 97:3        |
| <b>47</b>       | <b>6f</b> (1)   | <b>30</b> | <b>xylene</b>     | <b>Cs<sub>2</sub>CO<sub>3</sub>(0.5eq)</b> | <b>12</b> | <b>98</b> | <b>96.5:3.5</b> | <b>97:3</b> |
| 48              | <b>6f</b> (1)   | 35        | xylene            | Cs <sub>2</sub> CO <sub>3</sub> (0.5eq)    | 12        | 98        | 95:5            | 95:5        |
| 49              | <b>6f</b> (1)   | 40        | xylene            | Cs <sub>2</sub> CO <sub>3</sub> (0.5eq)    | 12        | 98        | 92.5:7.5        | 93:7        |
| 50              | <b>6f</b> (1)   | 30        | xylene            | K <sub>2</sub> CO <sub>3</sub> (2eq)       | 12        | 78        | 96:4            | 97:3        |

<sup>a</sup> *N*-(diphenylmethylene)glycine *tert*-butyl ester **3** (29.5 mg, 0.1 mmol), chalcone **4a** (21.8 mg, 0.105 mmol), **PTC**, base, 0.5mL solvent. <sup>b</sup> Toluene was used without further purification. <sup>c</sup> Xylene was distilled from CaH<sub>2</sub>. <sup>d</sup> 0.25 mL xylene and 0.25 ml hexane. <sup>e</sup> 1 mL xylene. <sup>f</sup> Yield of isolated product after purification. <sup>g</sup> Determined by HPLC analysis. <sup>h</sup> Determined by NMR or HPLC.

#### 4. General Procedure for Catalyzed Michael Addition:

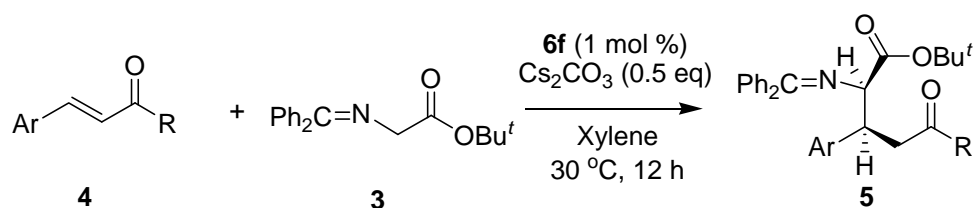

*N*-(diphenylmethylene)glycine *tert*-butyl ester **3** (29.5 mg, 0.1 mmol) was added to a mixture of substituted enones **4** (0.105 mmol), (*S,S*)-**6f** (2.9 mg, 0.001 mmol) and Cs<sub>2</sub>CO<sub>3</sub> (16.3 mg, 0.05 mmol) in xylene (0.5 mL) under argon atmosphere, the resulting solution was stirred at 30 °C for 12 h. The resulting mixture was purified by column chromatography on silica gel (AcOEt/petroleum ether = 1/10 as eluant) to furnish the conjugate adducts **5**.

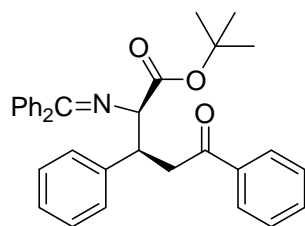

**(2R,3S)-tert-Butyl 2-(diphenylmethyleneamino)-5-oxo-3,5-diphenylpentanoate (5a)**: 49.4 mg, 98% yield;  $[\alpha]_D^{20} +81.7$  (*c* 1.0, CH<sub>2</sub>Cl<sub>2</sub>); <sup>1</sup>H NMR (500 MHz, CDCl<sub>3</sub>) δ 1.36 (s, 9H), 3.64–3.67 (m, 1H), 3.77–3.83 (m, 1H), 4.22–4.26 (m, 2H), 6.75 (d, *J* = 6.5 Hz, 1H), 7.14–7.19 (m, 5H), 7.32–7.39 (m, 5H), 7.42–7.47 (m, 3H), 7.55 (t, *J* = 7.5 Hz, 1H), 7.72 (d, *J* = 8.0 Hz, 2H), 8.01 (d, *J* = 8.0 Hz, 2H); <sup>13</sup>C NMR (125 MHz, CDCl<sub>3</sub>) δ 198.9, 171.4, 170.2, 141.6, 139.6, 137.4, 136.5, 133.1, 130.6, 129.1, 128.8, 128.7, 128.6, 128.5, 128.4, 128.4, 128.3, 127.7, 126.8, 84.5, 71.2, 45.0, 40.3, 28.1; MS (ESI) *m/z* 504.14 [*M* + 1]<sup>+</sup>; IR (KBr)  $\nu$  3060, 3021, 2976, 2930, 1728, 1687, 1622, 1597, 1493, 1447, 1367, 1286, 1148, 1002, 846, 698 cm<sup>-1</sup>; *dr* = 97/3, *er* = 96.5/3.5, determined by HPLC analysis (Chiralpak AD-H, *n*-hexane/2-propanol = 95/5, 0.5 ml/min, 254 nm UV detector), *t*<sub>R</sub> = 21.8 min (major) and *t*<sub>R</sub> = 30.3 min (minor).

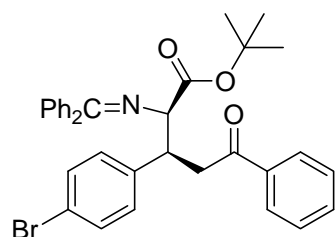

**(2R,3S)-tert-Butyl 3-(4-bromophenyl)-2-(diphenylmethyleneamino)-5-oxo-5-phenylpentanoate (5b):** 57.1 mg, 98% yield;  $[\alpha]_D^{20} +52.6$  (*c* 1.0, CH<sub>2</sub>Cl<sub>2</sub>); <sup>1</sup>H NMR (500 MHz, CDCl<sub>3</sub>) δ 1.36 (s, 9H), 3.60–3.63 (m, 1H), 3.75–3.81 (m, 1H), 4.15–4.18 (m, 2H), 6.75 (d, *J* = 6.0 Hz, 2H), 7.05 (d, *J* = 8.5 Hz, 2H), 7.29–7.39 (m, 7H), 7.41–7.48 (m, 3H), 7.54–7.57 (m, 1H), 7.67–7.69 (m, 2H), 7.97–7.99 (m, 2H); <sup>13</sup>C NMR (125 MHz, CDCl<sub>3</sub>) δ 198.6, 171.7, 170.0, 140.8, 139.4, 137.2, 136.3, 133.2, 131.4, 130.7, 130.5, 129.0, 128.8, 128.7, 128.5, 128.4, 128.3, 127.6, 120.6, 81.8, 70.8, 44.3, 39.9, 29.1; MS (ESI) *m/z* 584.11 [M + 1]<sup>+</sup>, 582.13 [M + 1]<sup>+</sup>; IR (KBr) *v* 3058, 2974, 2931, 1730, 1686, 1621, 1596, 1488, 1447, 1368, 1285, 1149, 1074, 1010, 834, 698 cm<sup>-1</sup>; *dr* = 95/5, *er* = 94/6, determined by HPLC analysis (Chiralpak AD-H, *n*-hexane/2-propanol = 95/5, 0.6 ml/min, 254 nm UV detector), *t*<sub>R</sub> = 24.0 min (major) and *t*<sub>R</sub> = 37.5 min (minor).

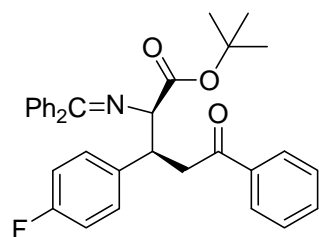

**(2R,3S)-tert-Butyl 2-(diphenylmethyleneamino)-3-(4-fluorophenyl)-5-oxo-5-phenylpentanoate (5c):** 51.2 mg, 98% yield;  $[\alpha]_D^{20} +74.6$  (*c* 1.0, CH<sub>2</sub>Cl<sub>2</sub>); <sup>1</sup>H NMR (500 MHz, CDCl<sub>3</sub>) δ 1.34 (s, 9H), 3.59–3.63 (m, 1H), 3.70–3.75 (m, 1H), 4.16–4.22 (m, 2H), 6.78 (d, *J* = 6.5 Hz, 2H), 6.85–6.89 (m, 2H), 7.12–7.15 (m, 2H), 7.34–7.39 (m, 5H), 7.41–7.47 (m, 3H), 7.53–7.56 (m, 1H), 7.69–7.71 (m, 2H), 7.96–7.98 (m, 2H); <sup>13</sup>C NMR (125 MHz, CDCl<sub>3</sub>) δ 198.8, 171.6, 170.1, 162.8, 160.8, 139.4, 137.3, 137.3, 137.2, 136.4, 133.2, 130.7, 130.3, 130.2, 129.1, 128.8, 128.7, 128.5, 128.4, 128.3, 127.7, 115.7, 115.2, 81.7, 71.1, 44.2, 40.3, 28.1; MS (ESI) *m/z* 520.17 [M - H]<sup>-</sup>; IR (KBr) *v* 3062, 3010, 2975, 2928, 1733, 1674, 1621, 1596, 1510, 1446, 1365,

1288, 1220, 1157, 1011, 840, 692  $\text{cm}^{-1}$ ;  $dr = 96/4$ ,  $er = 95/5$ , determined by HPLC analysis (Chiralpak OD-H, *n*-hexane/2-propanol = 95/5, 0.8 ml/min, 254 nm UV detector),  $t_R = 6.5$  min (major) and  $t_R = 14.2$  min (minor).

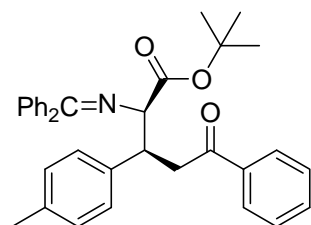

**(2R,3S)-tert-Butyl 2-(diphenylmethyleneamino)-5-oxo-5-phenyl-3-p-tolylpentanoate (5d):** 50.8 mg, 98% yield;  $[\alpha]_D^{20} +73.4$  (*c* 1.0,  $\text{CH}_2\text{Cl}_2$ );  $^1\text{H}$  NMR (500 MHz,  $\text{CDCl}_3$ )  $\delta$  1.36 (s, 9H), 2.27 (s, 3H), 3.63–3.66 (m, 1H), 3.75–3.80 (m, 1H), 4.17–4.21 (m, 2H), 6.77 (d,  $J = 7.0$  Hz, 2H), 6.78 (d,  $J = 7.5$  Hz, 2H), 7.07 (d,  $J = 8.0$  Hz, 2H), 7.33–7.39 (m, 5H), 7.42–7.47 (m, 3H), 7.53–7.56 (m, 1H), 7.73 (d,  $J = 8.0$  Hz, 2H), 8.01 (d,  $J = 8.0$  Hz, 2H);  $^{13}\text{C}$  NMR (125 MHz,  $\text{CDCl}_3$ )  $\delta$  199.0, 171.3, 170.3, 139.7, 138.5, 137.4, 136.6, 136.2, 133.0, 130.6, 129.1, 129.0, 128.7, 128.6, 128.6, 128.4, 128.3, 127.8, 81.4, 71.3, 44.7, 40.3, 28.1, 21.3; MS (ESI)  $m/z$  518.23  $[\text{M} + 1]^+$ ; IR (KBr)  $\nu$  3062, 3027, 2970, 2924, 1728, 1687, 1629, 1598, 1511, 1447, 1367, 1289, 1149, 1003, 850, 695  $\text{cm}^{-1}$ ;  $dr = 95/5$ ,  $er = 94/6$ , determined by HPLC analysis (Chiralpak OD-H, *n*-hexane/2-propanol = 98/2, 0.8 ml/min, 254 nm UV detector),  $t_R = 8.5$  min (major) and  $t_R = 24.8$  min (minor).

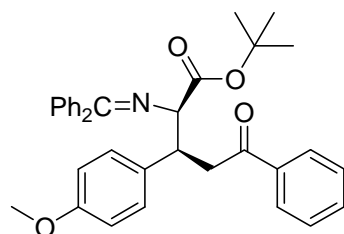

**(2R,3S)-tert-Butyl 2-(diphenylmethyleneamino)-3-(4-methoxyphenyl)-5-oxo-5-phenylpentanoate (5e):** 49.1 mg, 92% yield;  $[\alpha]_D^{20} +80.4$  (*c* 1.0,  $\text{CH}_2\text{Cl}_2$ );  $^1\text{H}$  NMR (500 MHz,  $\text{CDCl}_3$ )  $\delta$  1.34 (s, 9H), 3.57–3.60 (m, 1H), 3.66–3.70 (m, 1H), 3.73 (s, 3H), 4.14–4.16 (m, 2H), 6.72 (d,  $J = 8.5$  Hz, 2H), 6.78 (d,  $J = 7.0$  Hz, 2H), 7.07 (d,  $J = 8.5$  Hz, 2H), 7.33–7.38 (m, 5H), 7.40–7.46 (m, 3H), 7.52–7.55 (m, 1H), 7.70 (d,  $J = 7.5$

Hz, 2H), 7.97 (d,  $J = 8.0$  Hz, 2H);  $^{13}\text{C}$  NMR (125 MHz,  $\text{CDCl}_3$ )  $\delta$  199.1, 171.3, 170.3, 158.4, 139.6, 137.4, 136.5, 133.6, 133.0, 130.6, 129.7, 129.1, 128.7, 128.6, 128.5, 128.4, 128.2, 127.8, 113.7, 81.5, 71.3, 55.4, 44.3, 40.6, 28.1; MS (ESI)  $m/z$  534.19  $[\text{M} + 1]^+$ ; IR (KBr)  $\nu$  3058, 3027, 2974, 2931, 1726, 1687, 1612, 1597, 1513, 1447, 1367, 1246, 1149, 1031, 830, 694  $\text{cm}^{-1}$ ;  $dr = 97/3$ ,  $er = 96/4$ , determined by HPLC analysis (Chiralpak OD-H, *n*-hexane/2-propanol = 95/5, 0.8 ml/min, 254 nm UV detector),  $t_R = 8.7$  min (major) and  $t_R = 24.4$  min (minor).

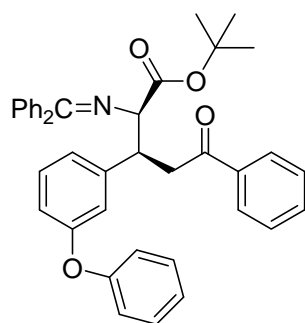

**(2R,3S)-tert-Butyl 2-(diphenylmethyleneamino)-5-oxo-3-(3-phenoxyphenyl)-5-phenylpentanoate (5f):** 58.4 mg, 98% yield;  $[\alpha]_D^{20} +70.9$  ( $c$  1.0,  $\text{CH}_2\text{Cl}_2$ );  $^1\text{H}$  NMR (500 MHz,  $\text{CDCl}_3$ )  $\delta$  1.36 (s, 9H), 3.55–3.59 (m, 1H), 3.72–3.78 (m, 1H), 4.13–4.18 (m, 2H), 6.79 (d,  $J = 7.5$  Hz, 3H), 6.83 (d,  $J = 8.5$  Hz, 3H), 6.93 (d,  $J = 8.0$  Hz, 1H), 7.02 (t,  $J = 7.0$  Hz, 1H), 7.13–7.21 (m, 3H), 7.33–7.41 (m, 6H), 7.44–7.47 (m, 2H), 7.54–7.57 (m, 1H), 7.66 (d,  $J = 8.0$  Hz, 2H), 7.97 (d,  $J = 8.0$  Hz, 2H);  $^{13}\text{C}$  NMR (125 MHz,  $\text{CDCl}_3$ )  $\delta$  198.8, 171.5, 170.1, 157.3, 157.1, 143.7, 139.5, 137.4, 136.5, 133.1, 130.6, 129.8, 129.6, 129.1, 127.7, 128.6, 128.5, 128.4, 128.2, 127.7, 123.8, 123.1, 119.2, 118.8, 117.3, 81.6, 70.9, 44.8, 40.0, 28.1; MS (ESI)  $m/z$  596.25  $[\text{M} + 1]^+$ ; IR (KBr)  $\nu$  3052, 3027, 2976, 2929, 1730, 1686, 1595, 1581, 1487, 1446, 1367, 1247, 1148, 1073, 1002, 908, 846, 755, 692  $\text{cm}^{-1}$ ;  $dr = 95/5$ ,  $er = 92.5/7.5$ , determined by HPLC analysis (Chiralpak OD-H, *n*-hexane/2-propanol = 95/5, 1.0 ml/min, 254 nm UV detector),  $t_R = 6.5$  min (major) and  $t_R = 12.0$  min (minor).

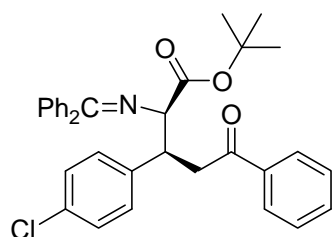

**(2R,3S)-tert-Butyl 3-(4-chlorophenyl)-2-(diphenylmethyleneamino)-5-oxo-5-phenylpentanoate (5g):** 50.6 mg, 94% yield;  $[\alpha]_D^{20} +58.8$  (*c* 1.0, CH<sub>2</sub>Cl<sub>2</sub>); <sup>1</sup>H NMR (500 MHz, CDCl<sub>3</sub>) δ 1.36 (s, 9H), 3.61–3.65 (m, 1H), 3.75–3.80 (m, 1H), 4.16–4.20 (m, 2H), 6.77 (d, *J* = 7.0 Hz, 2H), 7.11 (d, *J* = 8.5 Hz, 2H), 7.16 (d, *J* = 8.0 Hz, 2H), 7.34–7.39 (m, 5H), 7.41–7.48 (m, 3H), 7.54–7.57 (m, 1H), 7.69–7.70 (m, 2H), 7.97–7.99 (m, 2H); <sup>13</sup>C NMR (125 MHz, CDCl<sub>3</sub>) δ 198.6, 171.7, 170.0, 140.2, 139.4, 137.2, 136.4, 133.2, 132.5, 130.7, 130.1, 129.0, 128.8, 128.7, 128.6, 128.5, 128.4, 128.3, 127.7, 81.8, 70.9, 44.3, 40.0, 28.1; MS (ESI) *m/z* 538.18 [M]<sup>+</sup>; IR (KBr) *v* 3050, 3001, 2974, 2928, 1733, 1674, 1621, 1596, 1494, 1446, 1282, 1144, 1089, 1010, 836, 692 cm<sup>-1</sup>; *dr* = 95/5, *er* = 92/8, determined by HPLC analysis (Chiralpak OD-H, *n*-hexane/2-propanol = 95/5, 0.8 ml/min, 254 nm UV detector), *t<sub>R</sub>* = 6.6 min (major) and *t<sub>R</sub>* = 12.3 min (minor).

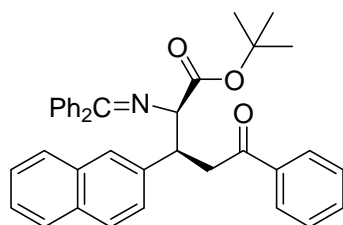

**(2R,3S)-tert-Butyl 2-(diphenylmethyleneamino)-3-(naphthalen-2-yl)-5-oxo-5-phenylpentanoate (5h):** 54.3 mg, 98% yield;  $[\alpha]_D^{20} +62.1$  (*c* 1.0, CH<sub>2</sub>Cl<sub>2</sub>); <sup>1</sup>H NMR (500 MHz, CDCl<sub>3</sub>) δ 1.36 (s, 9H), 3.76–3.80 (m, 1H), 3.94–4.00 (m, 1H), 4.35–4.46 (m, 2H), 6.68 (s, 2H), 7.24–7.26 (m, 2H), 7.33–7.41 (m, 6H), 7.43–7.48 (m, 3H), 7.54–7.57 (m, 1H), 7.66–7.71 (m, 3H), 7.75–7.76 (m, 3H), 8.03–8.04 (m, 2H); <sup>13</sup>C NMR (125 MHz, CDCl<sub>3</sub>) δ 198.8, 171.6, 170.3, 139.6, 139.2, 137.4, 136.5, 133.6, 133.1, 132.6, 130.6, 129.1, 128.8, 128.6, 128.5, 128.4, 128.3, 128.0, 127.9, 127.7, 127.5, 127.1, 126.0, 125.6, 81.6, 71.1, 45.1, 40.3, 28.1; MS (ESI) *m/z* 554.21 [M + 1]<sup>+</sup>; IR (KBr) *v* 3059, 3028, 2971, 2928, 1734, 1673, 1619, 1596, 1511, 1447, 1365,



1291, 1147, 1013, 826, 701  $\text{cm}^{-1}$ ;  $dr = 93/7$ ,  $er = 93/7$ , determined by HPLC analysis (Chiralpak OD-H, *n*-hexane/2-propanol = 95/5, 0.8 ml/min, 254 nm UV detector),  $t_R = 8.3$  min (major) and  $t_R = 17.1$  min (minor).

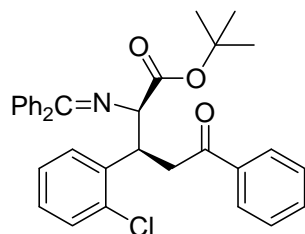

**(2R,3S)-tert-Butyl 3-(2-chlorophenyl)-2-(diphenylmethyleneamino)-5-oxo-5-phenylpentanoate (5i):** 49.6 mg, 92% yield;  $[\alpha]_D^{20} +88.9$  (*c* 1.0,  $\text{CH}_2\text{Cl}_2$ );  $^1\text{H}$  NMR (500 MHz,  $\text{CDCl}_3$ )  $\delta$  1.41 (s, 9H), 3.70–3.74 (m, 1H), 4.00–4.06 (m, 1H), 4.33 (d,  $J = 4.0$  Hz, 1H), 4.74–4.76 (m, 1H), 6.58 (d,  $J = 5.5$  Hz, 2H), 7.14–7.10 (m, 2H), 7.19 (d,  $J = 7.5$  Hz, 1H), 7.27–7.31 (m, 3H), 7.34–7.43 (m, 4H), 7.47 (t,  $J = 7.5$  Hz, 2H), 7.56 (t,  $J = 7.5$  Hz, 1H), 7.68 (d,  $J = 8.0$  Hz, 2H), 8.04 (d,  $J = 8.0$  Hz, 2H);  $^{13}\text{C}$  NMR (125 MHz,  $\text{CDCl}_3$ )  $\delta$  198.5, 171.8, 170.2, 139.5, 138.8, 137.2, 136.3, 134.7, 133.1, 130.6, 129.8, 129.3, 129.0, 128.7, 128.6, 128.4, 128.4, 128.2, 127.8, 127.5, 126.5, 81.7, 68.1, 40.9, 38.9, 28.2; MS (ESI)  $m/z$  538.17  $[\text{M}]^+$ ; IR (KBr)  $\nu$  3059, 3025, 2977, 2930, 1728, 1687, 1625, 1596, 1475, 1446, 1368, 1291, 1149, 1073, 1036, 1002, 846, 752, 693  $\text{cm}^{-1}$ ;  $dr = 99/1$ ,  $er = 95.5/4.5$ , determined by HPLC analysis (Chiralpak OD-H, *n*-hexane/2-propanol = 95/5, 0.8 ml/min, 254 nm UV detector),  $t_R = 7.1$  min (major) and  $t_R = 9.5$  min (minor).

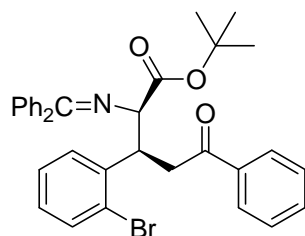

**(2R,3S)-tert-Butyl 3-(2-bromophenyl)-2-(diphenylmethyleneamino)-5-oxo-5-phenylpentanoate (5j):** 56.0 mg, 96% yield;  $[\alpha]_D^{20} +93.4$  (*c* 1.0,  $\text{CH}_2\text{Cl}_2$ );  $^1\text{H}$  NMR (500 MHz,  $\text{CDCl}_3$ )  $\delta$  1.42 (s, 9H), 3.69–3.73 (m, 1H), 4.04–4.09 (m, 1H), 4.31 (d,  $J = 2.5$  Hz, 1H), 4.70–4.73 (m, 1H), 6.52 (d,  $J = 4.0$  Hz, 2H), 6.98–7.02 (m, 1H),

7.08–7.11 (m, 1H), 7.16 (d,  $J = 7.5$  Hz, 1H), 7.26–7.29 (m, 2H), 7.33–7.42 (m, 4H), 7.47 (t,  $J = 8.0$  Hz, 3H), 7.56 (t,  $J = 7.5$  Hz, 1H), 7.67 (d,  $J = 8.0$  Hz, 2H), 8.04 (d,  $J = 7.5$  Hz, 2H);  $^{13}\text{C}$  NMR (125 MHz,  $\text{CDCl}_3$ )  $\delta$  198.5, 171.9, 170.1, 140.3, 139.4, 137.2, 136.3, 133.2, 133.1, 130.6, 129.4, 129.0, 128.7, 128.6, 128.5, 128.4, 128.2, 128.1, 127.4, 127.1, 125.7, 81.7, 68.0, 43.3, 38.9, 28.2; MS (ESI)  $m/z$  582.04  $[\text{M} + 1]^+$ , 584.06  $[\text{M} + 1]^+$ ; IR (KBr)  $\nu$  3060, 3021, 2976, 2928, 1728, 1687, 1624, 1597, 1470, 1446, 1368, 1291, 1151, 1022, 1003, 846, 752, 696  $\text{cm}^{-1}$ ;  $dr = 98/2$ ,  $er = 95/5$ , determined by HPLC analysis (Chiralpak OD-H, *n*-hexane/2-propanol = 95/5, 0.8 ml/min, 254 nm UV detector),  $t_R = 7.3$  min (major) and  $t_R = 8.8$  min (minor).

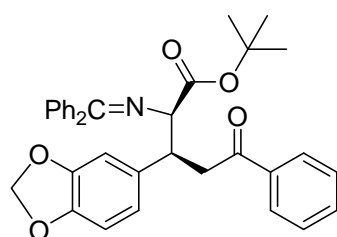

**(2R,3S)-tert-Butyl 3-(benzo[*d*][1,3]dioxol-5-yl)-2-(diphenylmethylenamino)-5-oxo-5-phenylpentanoate (5k):** 51.5 mg, 94% yield;  $[\alpha]_D^{20} +74.3$  ( $c$  1.0,  $\text{CH}_2\text{Cl}_2$ );  $^1\text{H}$  NMR (500 MHz,  $\text{CDCl}_3$ )  $\delta$  1.36 (s, 9H), 3.55–3.59 (m, 1H), 3.64–3.69 (m, 1H), 4.13–4.18 (m, 2H), 5.85 (s, 2H), 6.64–6.67 (m, 3H), 6.87 (d,  $J = 6.5$  Hz, 2H), 7.35–7.41 (m, 5H), 7.42–7.47 (m, 3H), 7.55 (t,  $J = 7.5$  Hz, 1H), 7.70–7.72 (m, 2H), 7.98–8.00 (m, 2H);  $^{13}\text{C}$  NMR (125 MHz,  $\text{CDCl}_3$ )  $\delta$  198.9, 171.4, 170.2, 147.5, 146.3, 139.6, 137.3, 136.5, 135.4, 133.1, 130.6, 129.1, 128.8, 128.7, 128.5, 128.4, 128.3, 127.8, 121.9, 109.2, 108.2, 100.9, 81.5, 71.3, 44.8, 40.6, 28.1; MS (ESI)  $m/z$  548.16  $[\text{M} + 1]^+$ ; IR (KBr)  $\nu$  3067, 3023, 2977, 2927, 1728, 1687, 1621, 1597, 1488, 1446, 1368, 1248, 1149, 1039, 935, 695  $\text{cm}^{-1}$ ;  $dr = 95/5$ ,  $er = 96/4$ , determined by HPLC analysis (Chiralpak OD-H, *n*-hexane/2-propanol = 95/5, 0.8 ml/min, 254 nm UV detector),  $t_R = 9.8$  min (major) and  $t_R = 20.5$  min (minor).

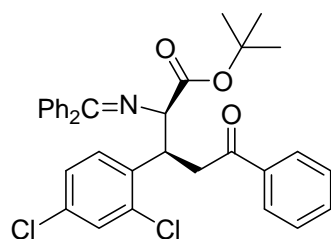

**(2R,3S)-tert-Butyl 3-(2,4-dichlorophenyl)-2-(diphenylmethyleneamino)-5-oxo-5-phenylpentanoate (5l):** 56.1 mg, 98% yield;  $[\alpha]_D^{20} +68.9$  (*c* 1.0, CH<sub>2</sub>Cl<sub>2</sub>); <sup>1</sup>H NMR (500 MHz, CDCl<sub>3</sub>) δ 1.42 (s, 9H), 3.70–3.74 (m, 1H), 3.99–4.04 (m, 1H), 4.29 (d, *J* = 2.5 Hz, 1H), 4.66–4.69 (m, 1H), 6.64 (d, *J* = 4.5 Hz, 2H), 7.04–7.14 (m, 2H), 7.30–7.39 (m, 6H), 7.40–7.44 (m, 1H), 7.48 (t, *J* = 7.5 Hz, 2H), 7.57 (t, *J* = 7.5 Hz, 1H), 7.67 (d, *J* = 7.5 Hz, 2H), 8.03 (d, *J* = 7.0 Hz, 2H); <sup>13</sup>C NMR (125 MHz, CDCl<sub>3</sub>) δ 198.3, 172.1, 170.0, 139.3, 137.6, 137.0, 136.1, 135.3, 133.3, 132.8, 130.7, 130.1, 129.5, 129.0, 128.8, 128.7, 128.5, 128.4, 128.3, 127.4, 126.7, 81.9, 67.8, 40.4, 38.7, 28.2; MS (ESI) *m/z* 572.07 [M]<sup>+</sup>; IR (KBr) ν 3073, 3006, 2974, 2924, 1732, 1673, 1621, 1595, 1476, 1445, 1366, 1285, 1144, 1009, 831, 691 cm<sup>-1</sup>; *dr* = 98/2, *er* = 95/5, determined by HPLC analysis (Chiralpak OD-H, *n*-hexane/2-propanol = 95/5, 0.8 ml/min, 254 nm UV detector), *t<sub>R</sub>* = 6.0 min (major) and *t<sub>R</sub>* = 7.5 min (minor).

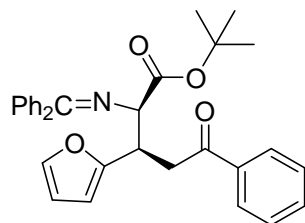

**(2R,3R)-tert-Butyl 2-(diphenylmethyleneamino)-3-(furan-2-yl)-5-oxo-5-phenylpentanoate (5m):** 48.4 mg, 98% yield;  $[\alpha]_D^{20} +53.4$  (*c* 1.0, CH<sub>2</sub>Cl<sub>2</sub>); <sup>1</sup>H NMR (500 MHz, CDCl<sub>3</sub>) δ 1.42 (s, 9H), 3.58–3.62 (m, 1H), 3.80–3.85 (m, 1H), 4.35–4.38 (m, 2H), 6.02 (d, *J* = 3.0 Hz, 1H), 6.20–6.21 (m, 1H), 6.94 (d, *J* = 6.0 Hz, 2H), 7.21–7.22 (m, 1H), 7.35 (t, *J* = 7.5 Hz, 2H), 7.39–7.43 (m, 4H), 7.48 (t, *J* = 7.5 Hz, 2H), 7.57 (t, *J* = 7.5 Hz, 1H), 7.68 (d, *J* = 8.0 Hz, 2H), 8.05 (d, *J* = 7.5 Hz, 2H); <sup>13</sup>C NMR (125 MHz, CDCl<sub>3</sub>) δ 198.5, 171.7, 170.0, 155.1, 141.2, 139.8, 137.2, 136.5, 133.2, 130.6, 129.1, 128.8, 128.8, 128.5, 128.4, 128.2, 127.9, 110.4, 106.7, 81.7, 68.9, 38.6, 38.5, 28.2; MS (ESI) *m/z* 494.18 [M + 1]<sup>+</sup>; IR (KBr) ν 3060, 3019, 2977, 2931, 1730, 1689,

1625, 1597, 1504, 1447, 1368, 1258, 1158, 1013, 847, 701  $\text{cm}^{-1}$ ;  $dr = 97/3$ ,  $er = 95/5$ , determined by HPLC analysis (Chiralpak OD-H, *n*-hexane/2-propanol = 95/5, 0.8 ml/min, 254 nm UV detector),  $t_R = 7.2$  min (major) and  $t_R = 25.8$  min (minor).

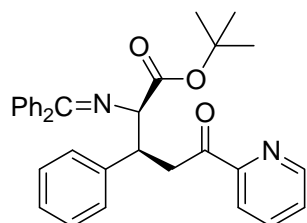

**(2*R*,3*S*)-tert-Butyl 2-(diphenylmethyleneamino)-5-oxo-3-phenyl-5-(pyridin-2-yl)pentanoate (5n):** 46.4 mg, 92% yield;  $[\alpha]_D^{20} +40.5$  (*c* 1.0,  $\text{CH}_2\text{Cl}_2$ );  $^1\text{H}$  NMR (500 MHz,  $\text{CDCl}_3$ )  $\delta$  1.29 (s, 9H), 3.76–3.80 (m, 1H), 3.94–3.99 (m, 1H), 4.21 (d,  $J = 6.0$  Hz, 1H), 4.29–4.33 (m, 1H), 6.85 (d,  $J = 6.0$  Hz, 2H), 7.10–7.13 (m, 1H), 7.17 (t,  $J = 7.0$  Hz, 2H), 7.22 (d,  $J = 7.0$  Hz, 2H), 7.30 (t,  $J = 7.5$  Hz, 2H), 7.34–7.39 (m, 5H), 7.64–7.70 (m, 3H) 7.87 (d,  $J = 8.0$  Hz, 1H), 8.67 (d,  $J = 4.0$  Hz, 1H);  $^{13}\text{C}$  NMR (125 MHz,  $\text{CDCl}_3$ )  $\delta$  200.5, 171.0, 170.2, 153.7, 148.9, 142.0, 139.6, 136.8, 136.6, 130.4, 129.1, 129.0, 128.5, 128.4, 128.2, 128.1, 127.9, 127.0, 126.6, 122.0, 81.2, 71.4, 45.1, 39.7, 28.0; MS (ESI)  $m/z$  505.15  $[\text{M} + 1]^+$ ; IR (KBr)  $\nu$  3062, 3027, 2975, 2919, 1728, 1698, 1619, 1582, 1490, 1445, 1367, 1284, 1147, 994, 850, 697  $\text{cm}^{-1}$ ;  $dr = 94/6$ ,  $er = 94/6$ , determined by HPLC analysis (Chiralpak OD-H, *n*-hexane/2-propanol = 90/10, 0.8 ml/min, 254 nm UV detector),  $t_R = 7.3$  min (major) and  $t_R = 22.1$  min (minor).

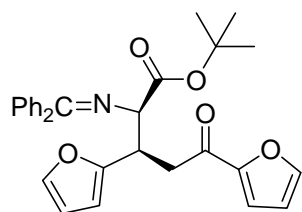

**(2*R*,3*R*)-tert-Butyl 2-(diphenylmethyleneamino)-3,5-di(furan-2-yl)-5-oxopentanoate (5o):** 44.0 mg, 91% yield;  $[\alpha]_D^{20} +64.1$  (*c* 1.0,  $\text{CH}_2\text{Cl}_2$ );  $^1\text{H}$  NMR (500 MHz,  $\text{CDCl}_3$ )  $\delta$  1.40 (s, 9H), 3.37–3.41 (m, 1H), 3.60–3.65 (m, 1H), 4.30–4.34 (m, 2H), 6.03 (d,  $J = 3.0$  Hz, 1H), 6.18–6.19 (m, 1H), 6.50–6.51 (m, 1H), 6.93 (d,  $J = 6.0$  Hz, 2H), 7.19–7.20 (m, 1H), 7.25 (d,  $J = 3.5$  Hz, 1H), 7.33 (t,  $J = 7.5$  Hz, 2H),

7.38–7.40 (m, 4H), 7.56 (s, 1H), 7.44–7.46 (m, 2H);  $^{13}\text{C}$  NMR (125 MHz,  $\text{CDCl}_3$ )  $\delta$  187.5, 171.7, 169.9, 154.8, 152.9, 146.5, 141.3, 139.7, 136.5, 130.6, 129.1, 129.1, 128.8, 128.5, 128.2, 128.1, 127.9, 127.9, 117.5, 112.4, 110.4, 106.9, 81.7, 68.8, 38.6, 38.5, 28.1; MS (ESI)  $m/z$  484.09  $[\text{M} + 1]^+$ ; IR (KBr)  $\nu$  3119, 3052, 2977, 2931, 1728, 1679, 1624, 1569, 1504, 1468, 1368, 1290, 1149, 1078, 1011, 908, 845, 734, 696, 597  $\text{cm}^{-1}$ ;  $dr = 98/2$ ,  $er = 94.5/5.5$ , determined by HPLC analysis (Chiralpak OD-H, *n*-hexane/2-propanol = 90/10, 0.8 ml/min, 254 nm UV detector),  $t_R = 8.7$  min (major) and  $t_R = 25.6$  min (minor).

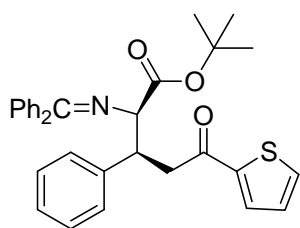

**(2R,3S)-tert-Butyl 2-(diphenylmethyleneamino)-5-oxo-3-phenyl-5-(thiophen-2-yl)pentanoate (5p):** 50.1 mg, 98% yield;  $[\alpha]_D^{20} +88.0$  ( $c$  1.0,  $\text{CH}_2\text{Cl}_2$ );  $^1\text{H}$  NMR (500 MHz,  $\text{CDCl}_3$ )  $\delta$  1.35 (s, 9H), 3.54–3.58 (m, 1H), 3.68–3.73 (m, 1H), 4.20–4.24 (m, 2H), 6.74 (d,  $J = 6.0$  Hz, 2H), 7.10–7.19 (m, 6H), 7.32–7.38 (m, 5H), 7.42 (t,  $J = 7.0$  Hz, 1H), 7.57 (d,  $J = 4.5$  Hz, 1H), 7.71 (d,  $J = 7.0$  Hz, 2H), 7.84 (d,  $J = 3.0$  Hz, 1H);  $^{13}\text{C}$  NMR (125 MHz,  $\text{CDCl}_3$ )  $\delta$  191.7, 171.4, 170.2, 144.8, 141.3, 139.6, 136.5, 133.6, 132.1, 130.6, 129.1, 128.8, 128.6, 128.5, 128.4, 128.3, 128.2, 127.7, 126.9, 81.6, 71.1, 45.3, 41.0, 28.1; MS (ESI)  $m/z$  510.12  $[\text{M} + 1]^+$ ; IR (KBr)  $\nu$  3062, 3026, 2977, 2931, 1729, 1664, 1623, 1587, 1515, 1413, 1368, 1289, 1147, 1024, 839, 696  $\text{cm}^{-1}$ ;  $dr = 96/4$ ,  $er = 95/5$ , determined by HPLC analysis (Chiralpak OD-H, *n*-hexane/2-propanol = 95/5, 0.8 ml/min, 254 nm UV detector),  $t_R = 8.8$  min (major) and  $t_R = 23.3$  min (minor).

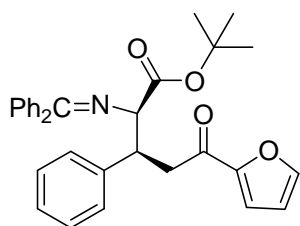

**(2R,3S)-tert-Butyl 2-(diphenylmethyleneamino)-5-(furan-2-yl)-5-oxo-3-phenylpentanoate (5q):** 47.0 mg, 95% yield;  $[\alpha]_D^{20} +94.2$  (*c* 1.0, CH<sub>2</sub>Cl<sub>2</sub>); <sup>1</sup>H NMR (500 MHz, CDCl<sub>3</sub>) δ 1.33 (s, 9H), 3.42–3.46 (m, 1H), 3.58–3.63 (m, 1H), 4.18–4.24 (m, 2H), 6.46–6.47 (m, 1H), 6.76 (d, *J* = 6.5 Hz, 2H), 7.12–7.18 (m, 6H), 7.32–7.42 (m, 6H), 7.53 (s, 1H), 7.70 (d, *J* = 8.0 Hz, 2H); <sup>13</sup>C NMR (125 MHz, CDCl<sub>3</sub>) δ 188.0, 171.4, 170.1, 153.1, 146.3, 141.3, 139.6, 136.5, 130.6, 129.1, 128.8, 128.6, 128.4, 128.3, 128.2, 127.8, 126.8, 117.2, 112.3, 81.5, 71.1, 44.9, 40.3, 28.1; MS (ESI) *m/z* 494.19 [M + 1]<sup>+</sup>; IR (KBr)  $\nu$  3062, 3023, 2976, 2931, 1730, 1678, 1622, 1568, 1468, 1392, 1368, 1286, 1149, 1028, 846, 766, 698 cm<sup>-1</sup>; *dr* = 98/2, *er* = 93.5/6.5, determined by HPLC analysis (Chiralpak OD-H, *n*-hexane/2-propanol = 95/5, 1.0 ml/min, 254 nm UV detector), *t*<sub>R</sub> = 8.3 min (major) and *t*<sub>R</sub> = 21.6 min (minor).

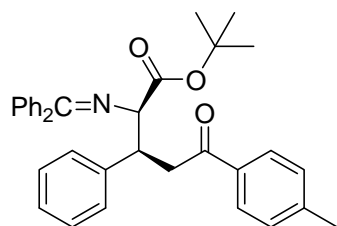

**(2R,3S)-tert-Butyl 2-(diphenylmethyleneamino)-5-oxo-3-phenyl-5-p-tolylpentanoate (5r):** 50.9 mg, 98% yield;  $[\alpha]_D^{20} +66.2$  (*c* 1.0, CH<sub>2</sub>Cl<sub>2</sub>); <sup>1</sup>H NMR (500 MHz, CDCl<sub>3</sub>) δ 1.34 (s, 9H), 2.41 (s, 3H), 3.57–3.61 (m, 1H), 3.73–3.78 (m, 1H), 4.18–4.22 (m, 2H), 6.73 (d, *J* = 7.0 Hz, 2H), 7.13–7.17 (m, 5H), 7.25 (d, *J* = 8.5 Hz, 2H), 7.31–7.39 (m, 5H), 7.42 (t, *J* = 7.0 Hz, 1H), 7.70 (d, *J* = 7.5 Hz, 2H), 7.90 (d, *J* = 8.0 Hz, 2H); <sup>13</sup>C NMR (125 MHz, CDCl<sub>3</sub>) δ 198.5, 171.3, 170.3, 143.7, 141.6, 139.6, 136.5, 134.9, 130.5, 129.4, 129.1, 128.8, 128.6, 128.5, 128.4, 128.3, 128.2, 127.7, 126.7, 81.5, 71.2, 45.1, 40.1, 28.1, 21.9; MS (ESI) *m/z* 518.16 [M + 1]<sup>+</sup>; IR (KBr)  $\nu$  3058, 3023, 2976, 2929, 1730, 1682, 1607, 1574, 1493, 1446, 1367, 1288, 1148, 1007, 847, 697 cm<sup>-1</sup>; *dr* = 94/6, *er* = 94/6, determined by HPLC analysis (Chiralpak OD-H, *n*-hexane/2-propanol = 95/5, 1.0 ml/min, 254 nm UV detector), *t*<sub>R</sub> = 4.9 min (major) and *t*<sub>R</sub> = 13.1 min (minor).

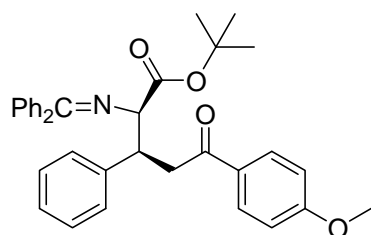

**(2R,3S)-tert-Butyl 2-(diphenylmethyleneamino)-5-(4-methoxyphenyl)-5-oxo-3-phenylpentanoate (5s):** 52.1 mg, 98% yield;  $[\alpha]_D^{20} +56.5$  (*c* 1.0, CH<sub>2</sub>Cl<sub>2</sub>); <sup>1</sup>H NMR (500 MHz, CDCl<sub>3</sub>) δ 1.34 (s, 9H), 3.55–3.58 (m, 1H), 3.70–3.76 (m, 1H), 3.86 (s, 3H), 4.19–4.23 (m, 2H), 6.73 (d, *J* = 6.5 Hz, 2H), 6.93 (d, *J* = 8.5 Hz, 2H), 7.13–7.17 (m, 5H), 7.31–7.38 (m, 5H), 7.42 (d, *J* = 6.5 Hz, 1H), 7.71 (d, *J* = 7.5 Hz, 2H), 7.99 (d, *J* = 8.5 Hz, 2H); <sup>13</sup>C NMR (125 MHz, CDCl<sub>3</sub>) δ 197.4, 171.3, 170.3, 163.5, 141.6, 139.6, 136.5, 130.7, 130.6, 130.5, 129.1, 128.8, 128.6, 128.4, 128.3, 128.2, 127.7, 126.7, 113.8, 81.5, 71.2, 55.6, 45.2, 39.9, 28.1; MS (ESI) *m/z* 534.22 [M + 1]<sup>+</sup>; IR (KBr) ν 3067, 3032, 2976, 2929, 1727, 1678, 1599, 1574, 1511, 1446, 1368, 1255, 1149, 1029, 841, 696 cm<sup>-1</sup>; *dr* = 97/3, *er* = 93.5/6.5, determined by HPLC analysis (Chiralpak OD-H, *n*-hexane/2-propanol = 95/5, 0.8 ml/min, 254 nm UV detector), *t*<sub>R</sub> = 12.2 min (major) and *t*<sub>R</sub> = 47.1 min (minor).

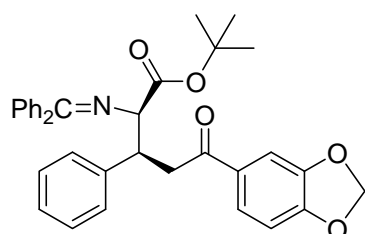

**(2R,3S)-tert-Butyl 5-(benzo[d][1,3]dioxol-5-yl)-2-(diphenylmethyleneamino)-5-oxo-3-phenylpentanoate (5t):** 53.2 mg, 97% yield;  $[\alpha]_D^{20} +65.0$  (*c* 1.0, CH<sub>2</sub>Cl<sub>2</sub>); <sup>1</sup>H NMR (500 MHz, CDCl<sub>3</sub>) δ 1.34 (s, 9H), 3.54–3.57 (m, 1H), 3.66–3.71 (m, 1H), 4.20–4.22 (m, 2H), 5.99 (s, 2H), 6.73 (d, *J* = 6.5 Hz, 2H), 6.85 (d, *J* = 8.0 Hz, 1H), 7.13–7.18 (m, 5H), 7.31–7.37 (m, 5H), 7.40–7.44 (m, 2H), 7.64–7.66 (m, 1H), 7.71 (d, *J* = 7.5 Hz, 2H); <sup>13</sup>C NMR (125 MHz, CDCl<sub>3</sub>) δ 196.9, 171.4, 170.2, 151.7, 148.3, 141.6, 139.6, 136.5, 132.3, 130.6, 129.1, 128.8, 128.6, 128.5, 128.4, 128.3, 127.7, 126.8, 124.6, 108.3, 108.0, 102.0, 81.5, 71.2, 45.3, 40.0, 28.1; MS (ESI) *m/z* 548.14 [M + 1]<sup>+</sup>; IR (KBr) ν 3060, 3023, 2976, 2928, 1728, 1678, 1614, 1594, 1487, 1443,

1367, 1254, 1148, 1037, 846, 697  $\text{cm}^{-1}$ ;  $dr = 98/2$ ,  $er = 96.5/3.5$ , determined by HPLC analysis (Chiralpak OD-H, *n*-hexane/2-propanol = 95/5, 0.8 ml/min, 254 nm UV detector),  $t_R = 13.2$  min (major) and  $t_R = 33.1$  min (minor).

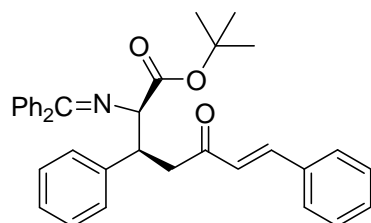

**(2R,3S)-tert-Butyl 2-(diphenylmethyleneamino)-5-oxo-3,7-diphenylhept-6-enoate**

**(5u):** 52.2 mg, 98% yield;  $[\alpha]_D^{20} +44.8$  (*c* 1.0,  $\text{CH}_2\text{Cl}_2$ );  $^1\text{H}$  NMR (400 MHz,  $\text{CDCl}_3$ )  $\delta$  1.37 (s, 9H), 3.31–3.36 (m, 1H), 3.43–3.49 (m, 1H), 4.26–4.22 (m, 2H), 6.77–6.81 (m, 2H), 7.17–7.24 (m, 5H), 7.33–7.45 (m, 10H), 7.54–7.61 (m, 3H), 7.74 (d,  $J = 7.6$  Hz, 2H);  $^{13}\text{C}$  NMR (100 MHz,  $\text{CDCl}_3$ )  $\delta$  198.7, 171.2, 170.0, 142.5, 141.1, 139.4, 136.3, 134.7, 130.4, 130.3, 128.9, 128.8, 128.7, 128.6, 128.4, 128.3, 128.2, 128.2, 128.1, 127.6, 126.7, 126.2, 81.3, 71.0, 45.0, 42.7, 27.9; MS (ESI)  $m/z$  530.64 [ $\text{M} + 1$ ] $^+$ ; IR (KBr)  $\nu$  3059, 3029, 2976, 2929, 1728, 1685, 1611, 1489, 1449, 1362, 1327, 1285, 1153, 1079, 977, 786, 697  $\text{cm}^{-1}$ ;  $dr = 97/3$ ,  $er = 91/9$ , determined by HPLC analysis (Chiralpak AD-H, *n*-hexane/2-propanol = 90/10, 1.0 ml/min, 254 nm UV detector),  $t_R = 11.8$  min (major) and  $t_R = 21.8$  min (minor).

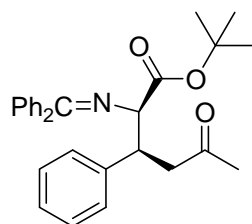

**(2R,3S)-tert-Butyl 2-(diphenylmethyleneamino)-5-oxo-3-phenylhexanoate (5v):**

37.1 mg, 84% yield;  $[\alpha]_D^{20} +96.2$  (*c* 1.0,  $\text{CH}_2\text{Cl}_2$ );  $^1\text{H}$  NMR (500 MHz,  $\text{CDCl}_3$ )  $\delta$  1.33 (s, 9H), 2.09 (s, 3H), 3.05–3.09 (m, 1H), 3.13–3.18 (m, 1H), 4.00–4.04 (m, 1H), 4.09 (d,  $J = 5.5$  Hz, 1H), 6.73 (d,  $J = 7.0$  Hz, 2H), 7.13–7.21 (m, 5H), 7.30–7.38 (m, 5H), 7.39–7.42 (m, 1H), 7.67–7.69 (m, 2H);  $^{13}\text{C}$  NMR (125 MHz,  $\text{CDCl}_3$ )  $\delta$  207.6, 171.3, 170.2, 141.4, 139.5, 136.4, 130.6, 129.0, 128.7, 128.6, 128.5, 128.4, 128.3, 127.7,



126.9, 81.5, 71.1, 45.5, 44.8, 30.6, 28.1; MS (ESI)  $m/z$  442.10  $[M + 1]^+$ ; IR (KBr)  $\nu$  3060, 3028, 2977, 2931, 1724, 1659, 1623, 1597, 1575, 1492, 1446, 1392, 1367, 1250, 1149, 1083, 1028, 846, 765, 699  $\text{cm}^{-1}$ ;  $dr = 93/7$ ,  $er = 90.5/9.5$ , determined by HPLC analysis (Chiralpak AD-H, *n*-hexane/2-propanol = 95/5, 1.0 ml/min, 254 nm UV detector),  $t_R = 6.7$  min (major) and  $t_R = 8.3$  min (minor).

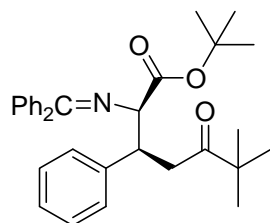

**(2R,3S)-tert-Butyl 2-(diphenylmethyleneamino)-6,6-dimethyl-5-oxo-3-phenylheptanoate (5w):** 28.0 mg, 57% yield;  $[\alpha]_D^{20} +108.7$  (*c* 1.0,  $\text{CH}_2\text{Cl}_2$ );  $^1\text{H}$  NMR (500 MHz,  $\text{CDCl}_3$ )  $\delta$  1.05 (s, 9H), 1.33 (s, 9H), 3.00–3.05 (m, 1H), 3.32–3.38 (m, 1H), 4.02–4.05 (m, 1H), 4.11 (d,  $J = 5.5$  Hz, 1H), 6.71 (d,  $J = 6.5$  Hz, 2H), 7.11–7.19 (m, 5H), 7.29–7.37 (m, 5H), 7.40–7.42 (m, 1H), 7.67–7.69 (m, 2H);  $^{13}\text{C}$  NMR (125 MHz,  $\text{CDCl}_3$ )  $\delta$  213.9, 171.1, 170.3, 142.0, 139.6, 136.6, 130.5, 129.0, 128.8, 128.5, 128.4, 128.3, 128.2, 127.7, 126.6, 81.3, 70.9, 44.3, 44.3, 38.2, 28.1, 26.5; MS (ESI)  $m/z$  484.17  $[M + 1]^+$ ; IR (KBr)  $\nu$  3057, 3032, 2970, 2924, 1727, 1708, 1613, 1480, 1444, 1367, 1285, 1148, 1070, 850, 779, 699  $\text{cm}^{-1}$ ,  $dr = 99/1$ ,  $er = 91/9$ , determined by HPLC analysis (Chiralpak AD-H, *n*-hexane/2-propanol = 95/5, 0.5 ml/min, 254 nm UV detector),  $t_R = 12.4$  min (major) and  $t_R = 14.8$  min (minor).

## 5. Large-scale Synthesis and Recovery of Catalyst **6f**:

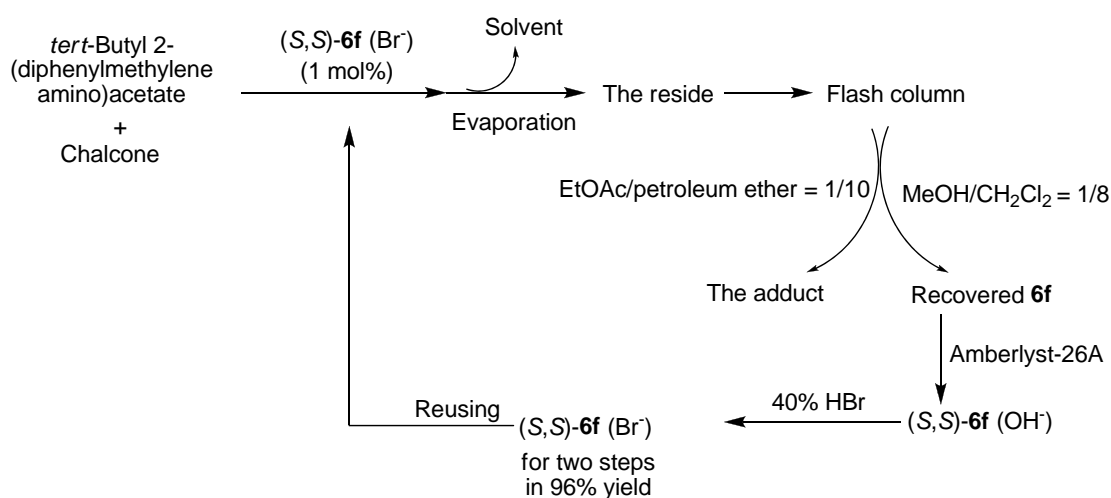

*N*-(diphenylmethylene)glycine *tert*-butyl ester **3** (11.8 g, 40 mmol) was added to a mixture of 3-(2-bromophenyl)-1-phenylprop-2-en-1-one **4j** (12.1 g, 42 mmol), (S,S)-**6f** (1.17 g, 0.4 mmol) and Cs<sub>2</sub>CO<sub>3</sub> (6.5 g, 20 mmol) in xylene (200 mL) under argon atmosphere, the resulting solution was stirred at 30 °C for 12 h. The resulting mixture was purified by column chromatography on silica gel (AcOEt/petroleum ether = 1/10 as eluant) to furnish the conjugate adducts **5j** (21.4 g, 92% yield, *dr* = 98/2, *er* = 95/5, determined by HPLC analysis). The catalyst **6f** was recovered (MeOH/CH<sub>2</sub>Cl<sub>2</sub> = 1/8 as eluant) in almost quantitative yield.

Anion exchange of recovered catalyst **6f** using Amberlyst-26A (OH<sup>-</sup> form) gave (S,S)-**6f** (OH<sup>-</sup>). The methanol solution of (S,S)-**6f** (OH<sup>-</sup>) was treated with 40% HBr aqueous solution (excess) at room temperature. The resulting mixture was poured into water and extracted with CH<sub>2</sub>Cl<sub>2</sub>. The organic extracts were washed with 5% K<sub>2</sub>CO<sub>3</sub> aqueous solution and dried over MgSO<sub>4</sub>. Evaporation of solvents gave reactivated catalyst (S,S)-**6f** (Br<sup>-</sup>) of 1.12 g in 96% yield.

*N*-(diphenylmethylene)glycine *tert*-butyl ester **3** (29.5 mg, 0.1 mmol) was added to a mixture of 3-(2-bromophenyl)-1-phenylprop-2-en-1-one **4j** (30.1 mg, 0.105 mmol), recovered (S,S)-**6f** (2.9 mg, 0.001 mmol) and Cs<sub>2</sub>CO<sub>3</sub> (16.3 mg, 0.05 mmol) in xylene (0.5 mL) under argon atmosphere, the resulting solution was stirred at 30 °C for 12 h. The resulting mixture was purified by column chromatography on silica gel (AcOEt/

petroleum ether = 1/10 as eluant) to furnish the conjugate adducts **5j** (54.9 mg, 94% yield, *dr* = 98/2, *er* = 95/5 determined by HPLC analysis).

## 6. Synthetic Transformations of the Adducts 5:

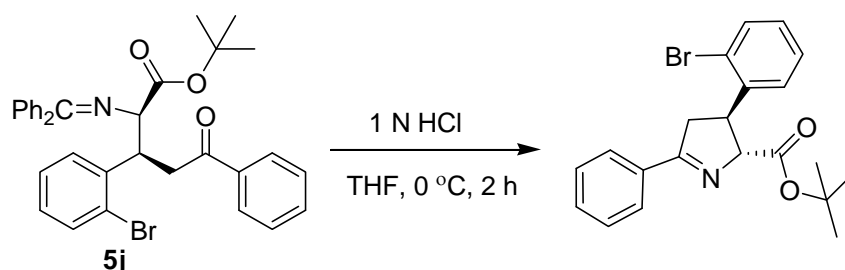

**(2*R*,3*S*)-tert-Butyl 3-(2-bromophenyl)-5-phenyl-3,4-dihydro-2H-pyrrole-2-carboxylate:**<sup>1</sup> 1 N hydrochloric acid (3.0 mL) was added to a solution of **5j** (174.8mg, 0.3 mmol) in THF (3.0 mL) at 0 °C, and stirring was maintained for 2 h. The resulting mixture was neutralized by addition of solid NaHCO<sub>3</sub> and extracted with CH<sub>2</sub>Cl<sub>2</sub>. The organic extracts were dried over MgSO<sub>4</sub> and concentrated. The residue was purified by column chromatography on silica gel (AcOEt/petroleum ether = 1/10 as eluant) to afford (2*R*,3*S*)-tert-Butyl 3-(2-bromophenyl)-5-phenyl-3,4-dihydro-2H-pyrrole-2-carboxylate (120.1 mg, 0.3 mmol) in quantitative yield.  $[\alpha]_D^{20}$  -59.0 (*c* 1.0, CH<sub>2</sub>Cl<sub>2</sub>); <sup>1</sup>H NMR (500 MHz, CDCl<sub>3</sub>)  $\delta$  1.48 (s, 9H), 3.07–3.11 (m, 1H), 3.66–3.72 (m, 1H), 4.25–4.29 (m, 1H), 4.93–4.95 (m, 1H), 7.08–7.11 (m, 1H), 7.14–7.16 (m, 1H), 7.24–7.28 (m, 1H), 7.42–7.49 (m, 3H), 7.58–7.60 (m, 1H), 7.91–7.93 (m, 2H); <sup>13</sup>C NMR (125 MHz, CDCl<sub>3</sub>)  $\delta$  175.0, 171.2, 143.1, 133.8, 133.3, 131.3, 128.7, 128.5, 128.4, 128.3, 127.9, 124.3, 82.5, 81.8, 45.8, 44.4, 28.2; MS (ESI) *m/z* 400.07 [M + 1]<sup>+</sup>, 402.06 [M + 1]<sup>+</sup>; IR (KBr)  $\nu$  3047, 3011, 2980, 2929, 1726, 1615, 1576, 1472, 1446, 1367, 1244, 1147, 1024, 795, 760, 695 cm<sup>-1</sup>; *er* = 95/5, determined by HPLC analysis (Chiralpak AD-H, *n*-hexane/2-propanol = 95/5, 1.0 ml/min, 254 nm UV detector), *t*<sub>R</sub> = 15.4 min (major) and *t*<sub>R</sub> = 16.7 min (minor).

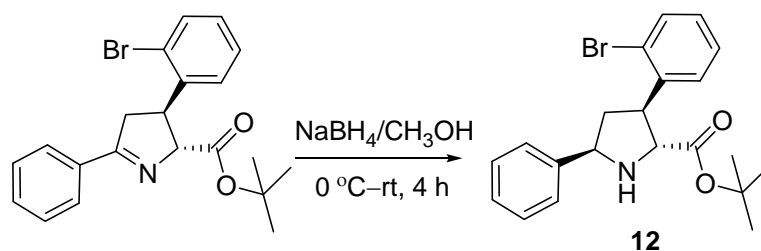

**(2R,3S,5R)-tert-Butyl 3-(2-bromophenyl)-5-phenylpyrrolidine-2-carboxylate (12):**

To a solution of (2R,3S)-tert-butyl 3-(2-bromophenyl)-5-phenyl-3,4-dihydro-2H-pyrrole-2-carboxylate (80.1 mg, 0.2 mmol) in 2 mL of MeOH was added NaBH<sub>4</sub> (37.8 mg, 1.0 mmol) in portions at 0 °C. The resultant mixture was stirred for 4 h at room temperature (monitored by TLC). The mixture was evaporated *in vacuo*, added water (5 mL), and extracted with dichloromethane (5 mL × 3), washed with brine and dried with MgSO<sub>4</sub>. Concentration and flash chromatography (AcOEt/petroleum ether = 1/20 as eluant) afforded (2R,3S,5R)-tert-butyl 3-(2-bromophenyl)-5-phenylpyrrolidine-2-carboxylate **12** (50.6 mg, 0.126 mmol, 63% yield) as a colorless oil.  $[\alpha]_D^{20} -7.6$  (*c* 1.0, CH<sub>2</sub>Cl<sub>2</sub>); <sup>1</sup>H NMR (400 MHz, CDCl<sub>3</sub>) δ 1.43 (s, 9H), 1.78–1.82 (m, 1H), 2.65–2.72 (m, 2H), 3.99–4.07 (m, 2H), 4.56–4.60 (m, 1H), 7.10 (t, *J* = 7.6 Hz, 1H), 7.25–7.38 (m, 4H), 7.49–7.58 (m, 4H); <sup>13</sup>C NMR (125 MHz, CDCl<sub>3</sub>) δ 173.8, 143.9, 142.5, 132.6, 128.4, 128.3, 128.0, 127.9, 127.1, 126.5, 124.5, 81.4, 67.4, 62.4, 48.9, 45.1, 27.9; MS (ESI) *m/z* 402.15 [M + 1]<sup>+</sup>, 404.10 [M + 1]<sup>+</sup>; IR (KBr) ν 3343, 3061, 3027, 2976, 2931, 1727, 1603, 1474, 1440, 1368, 1230, 1155, 1024, 846, 752, 700 cm<sup>-1</sup>; *er* = 95/5, determined by HPLC analysis (Chiralpak AD-H, *n*-hexane/2-propanol = 95/5, 0.8 ml/min, 254 nm UV detector), *t*<sub>R</sub> = 9.4 min (major) and *t*<sub>R</sub> = 11.7 min (minor).

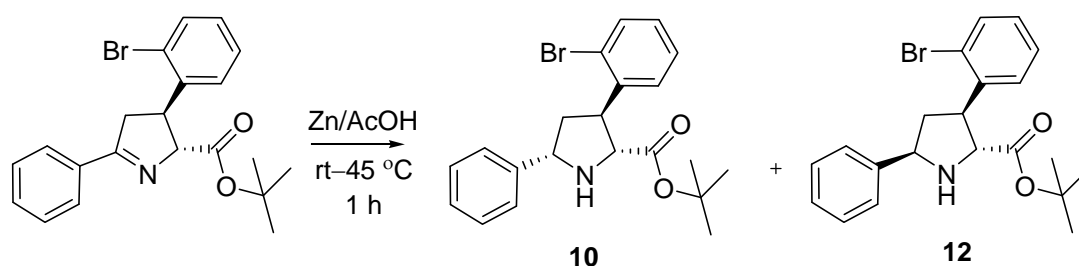

***tert*-Butyl 3-(2-bromophenyl)-5-phenylpyrrolidine-2-carboxylate:** To a solution of (2*R*,3*S*)-*tert*-butyl 3-(2-bromophenyl)-5-phenyl-3,4-dihydro-2*H*-pyrrole-2-carboxylate (80.1 mg, 0.2 mmol) in 2 mL of AcOH was added Zinc powder (30 equiv) in portions at room temperature. The resultant mixture was stirred for 1 h at 45 °C (monitored by TLC). After Zinc powder was filtered off, the filtrate was cooled to 0 °C. The filtrate was diluted with ethyl acetate and neutralized by the addition of sodium hydrogen carbonate (70% saturated *aq*). The mixture was extracted with dichloromethane (10 mL × 4), washed with brine and dried with MgSO<sub>4</sub>. Concentration and flash chromatography (AcOEt/petroleum ether = 1/20–1/4 as eluant) afforded both (2*R*,3*S*,5*S*)-*tert*-butyl 3-(2-bromophenyl)-5-phenylpyrrolidine-2-carboxylate **10** (39.2 mg, 0.097 mmol, 48% yield) as a colorless oil and (2*R*,3*S*,5*R*)-*tert*-butyl 3-(2-bromophenyl)-5-phenylpyrrolidine-2-carboxylate **12** (12.2 mg, 0.030 mmol, 15% yield).

(2*R*,3*S*,5*S*)-*tert*-butyl 3-(2-bromophenyl)-5-phenylpyrrolidine-2-carboxylate (**10**):  $[\alpha]_D^{20} -26.2$  (*c* 1.0, CH<sub>2</sub>Cl<sub>2</sub>); <sup>1</sup>H NMR (500 MHz, CDCl<sub>3</sub>) δ 1.41 (s, 9H), 2.19–2.24 (m, 1H), 2.28–2.34 (m, 1H), 2.62 (s, 1H), 3.96 (d, *J* = 6.5 Hz, 1H), 4.01–4.05 (m, 1H), 4.46 (t, *J* = 6.5 Hz, 1H), 7.10–7.13 (m, 1H), 7.26–7.29 (m, 1H), 7.34–7.38 (m, 3H), 7.47–7.50 (m, 3H), 7.57–7.59 (m, 1H); <sup>13</sup>C NMR (125 MHz, CDCl<sub>3</sub>) δ 173.2, 143.7, 142.2, 133.1, 128.8, 128.3, 128.2, 128.2, 128.0, 127.5, 126.9, 124.9, 81.7, 67.7, 62.4, 49.3, 42.9, 28.1; MS (ESI) *m/z* 402.03 [*M* + 1]<sup>+</sup>, 404.05 [*M* + 1]<sup>+</sup>; IR (KBr)  $\nu$  3359, 3060, 2976, 2930, 1727, 1472, 1392, 1367, 1246, 1155, 1023, 846, 753, 700 cm<sup>-1</sup>; *er* = 95/5, determined by HPLC analysis (Chiralpak AD-H, *n*-hexane/2-propanol = 95/5, 0.8 ml/min, 254 nm UV detector), *t*<sub>R</sub> = 9.4 min (minor) and *t*<sub>R</sub> = 17.2 min (major).

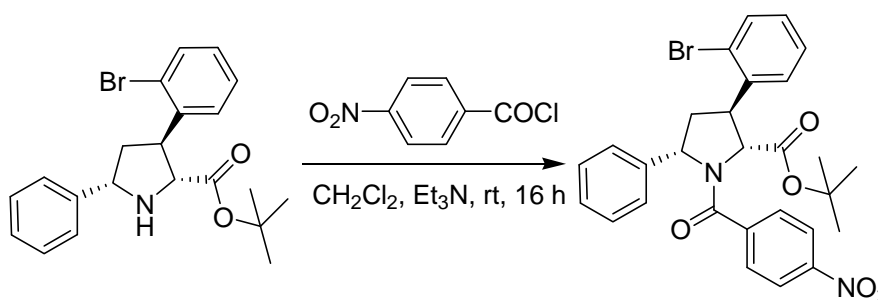

**(2R,3S,5S)-tert-Butyl 3-(2-bromophenyl)-1-(4-nitrobenzoyl)-5-phenylpyrrolidine-2-carboxylate:** (2R,3S,5S)-tert-Butyl 3-(2-bromophenyl)-5-phenylpyrrolidine-2-carboxylate **10** (40.2 mg, 0.1 mmol) was dropped to a mixture of 4-nitrobenzoyl chloride (37.1 mg, 0.2 mmol) and Et<sub>3</sub>N (41.8 μl, 0.3 mmol) in dry CH<sub>2</sub>Cl<sub>2</sub> (1.5 mL) at 0 °C under argon atmosphere, then stirring was maintained for 16 h at room temperature. The resulting mixture was quenched with aqueous NaHCO<sub>3</sub> and extracted with CH<sub>2</sub>Cl<sub>2</sub>. The organic extracts were dried over MgSO<sub>4</sub> and concentrated. The residue was purified by column chromatography on silica gel (AcOEt/petroleum ether = 1/4 as eluant) to afford the product (48.0 mg, 0.087 mmol, 87% yield) as a white solid. Mp 70–72 °C; [α]<sub>D</sub><sup>20</sup> -34.8 (c 1.0, CH<sub>2</sub>Cl<sub>2</sub>); <sup>1</sup>H NMR (500 MHz, CDCl<sub>3</sub>) δ 1.47 (s, 9H), 2.37–2.48 (m, 2H), 4.19–4.23 (m, 1H), 4.81–4.83 (m, 1H), 4.87 (d, *J* = 8.0 Hz, 1H), 7.18 (t, *J* = 7.5 Hz, 1H), 7.30 (t, *J* = 7.5 Hz, 2H), 7.35 (d, *J* = 8.5 Hz, 2H), 7.39 (t, *J* = 7.5 Hz, 1H), 7.45 (d, *J* = 7.5 Hz, 1H), 7.49 (d, *J* = 7.5 Hz, 2H), 7.60 (d, *J* = 8.0 Hz, 1H), 7.98 (d, *J* = 8.5 Hz, 2H), 8.24–8.30 (m, 1H); <sup>13</sup>C NMR (125 MHz, CDCl<sub>3</sub>) δ 169.5, 169.2, 148.3, 142.1, 142.7, 138.3, 133.3, 128.9, 128.8, 127.9, 127.7, 127.3, 126.7, 124.9, 123.5, 123.1, 82.2, 66.5, 58.4, 44.4, 43.1, 28.0; MS (ESI) *m/z* 573.05 [M + Na]<sup>+</sup>, 575.05 [M + Na]<sup>+</sup>; IR (KBr) ν 3062, 2975, 2929, 2868, 1739, 1646, 1601, 1524, 1417, 1346, 1224, 1148, 1024, 850, 758, 702 cm<sup>-1</sup>; *er* = 95/5, determined by HPLC analysis (Chiralpak AD-H, *n*-hexane/2-propanol = 70/30, 1.0 ml/min, 254 nm UV detector), *t*<sub>R</sub> = 24.8 min (minor) and *t*<sub>R</sub> = 35.6 min (major).

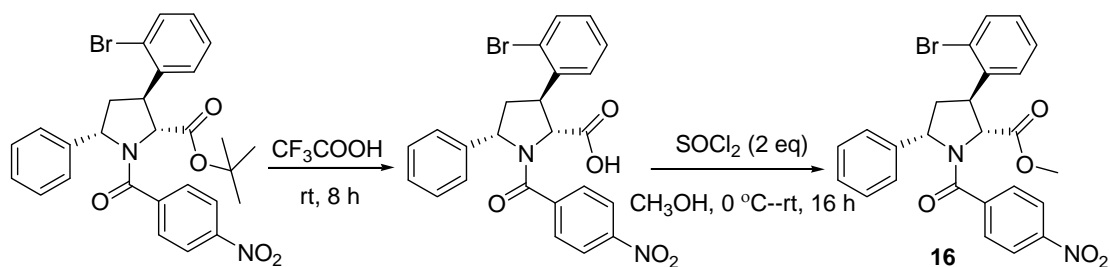

**(2R,3S,5S)-Methyl 3-(2-bromophenyl)-1-(4-nitrobenzoyl)-5-phenylpyrrolidine-2-carboxylate (16):** tert-Butyl 3-(2-bromophenyl)-1-(4-nitrobenzoyl)-5-phenylpyrrolidine-2-carboxylate (48.0 mg, 0.087 mmol) was stirred in neat trifluoroacetic acid (4 mL) for 8 h at room temperature. The mixture was evaporated *in vacuo*, and

purified by flash column chromatography on silica gel (AcOEt/petroleum ether = 1/1 as eluant) to afford 3-(2-bromophenyl)-1-(4-nitrobenzoyl)-5-phenylpyrrolidine-2-carboxylic acid. SOCl<sub>2</sub> (12.7 μL, 0.128 mmol) was dropped to a solution of 3-(2-bromophenyl)-1-(4-nitrobenzoyl)-5-phenylpyrrolidine-2-carboxylic acid (43.0 mg, 0.087 mmol) in dry methanol (2 mL) at 0 °C, then stirring was maintained for 16 h at room temperature. The mixture was evaporated *in vacuo*, and purified by column chromatography on silica gel (AcOEt/petroleum ether = 1/4 as eluant) to afford the product **16** (40.7 mg, 0.080 mmol, 92% yield). Recrystallization of this product from AcOEt/hexane furnished suitable crystals for X-ray structure analysis. Mp 86–89 °C; [α]<sub>D</sub><sup>20</sup> –63.2 (*c* 1.0, CH<sub>2</sub>Cl<sub>2</sub>); <sup>1</sup>H NMR (400 MHz, CDCl<sub>3</sub>) δ 2.48–2.56 (m, 2H), 3.86 (s, 3H), 4.19–4.23 (m, 1H), 4.85–4.87 (m, 1H), 4.97 (d, *J* = 5.2 Hz, 1H), 7.20–7.27 (m, 4H), 7.35 (d, *J* = 8.4 Hz, 2H), 7.41–7.49 (m, 4H), 7.63 (d, *J* = 6.4 Hz, 1H), 7.98 (d, *J* = 6.4 Hz, 2H); <sup>13</sup>C NMR (100 MHz, CDCl<sub>3</sub>) δ 171.4, 169.1, 148.3, 141.7, 138.3, 133.6, 129.1, 128.8, 128.1, 127.8, 127.7, 126.7, 124.9, 123.1, 65.6, 63.6, 52.8, 44.3, 42.9; MS (ESI) *m/z* 509.02 [M + 1]<sup>+</sup>, 511.04 [M + 1]<sup>+</sup>; IR (KBr) ν 2955, 2919, 2847, 1737, 1645, 1593, 1399, 1386, 1359, 1209, 1152, 1019, 827, 758, 707 cm<sup>-1</sup>; *dr* > 99.9/0.1, *er* = 95/5 (>99.9/0.1 after recrystallization), determined by HPLC analysis (Chiralpak AD-H, *n*-hexane/2-propanol = 50/50, 0.8 ml/min, 254 nm UV detector), *t*<sub>R</sub> = 28.3 min (major) and *t*<sub>R</sub> = 60.3 min (minor).

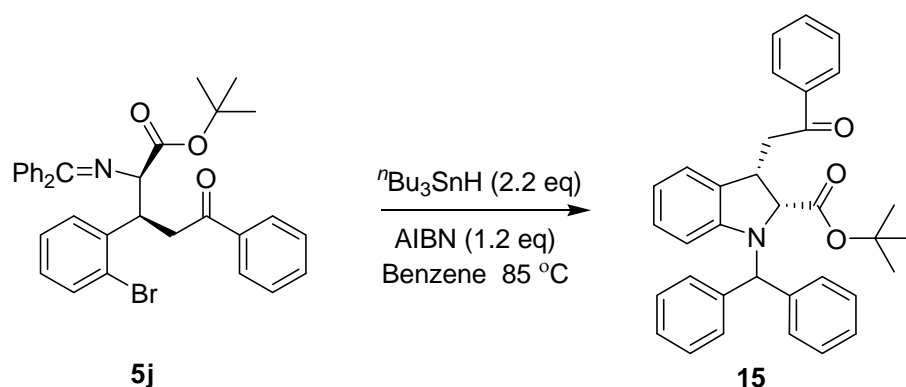

**(2*R*,3*S*)-tert-Butyl 1-benzhydryl-3-(2-oxo-2-phenylethyl)indoline-2-carboxylate (17):**<sup>2</sup> A benzene solution of the **5j** (99.5 mg, 0.17 mmol) and <sup>n</sup>Bu<sub>3</sub>SnH (110.6 mg, 0.38 mmol) was warmed to 85 °C under argon atmosphere. AIBN (34.5 mg, 0.21

mmol) was added as a benzene solution by syringe pump over a 4–5 hour period. The solution was refluxed an additional hour, cooled, and concentrated. The residue was treated with a 1/1 (v/v) ether–satd *aq* KF solution and stirred vigorously until a white precipitate formed. The organic layer was washed with water, dried with MgSO<sub>4</sub>, filtered, and concentrated. The residue was purified by column chromatography on silica gel (AcOEt/petroleum ether = 1/10 as eluant) to afford the product **17** (70.7 mg, 0.14 mmol, 82% yield) as a whiter solid. Mp 58–60 °C; [ $\alpha$ ]<sub>D</sub><sup>20</sup> +112.0 (*c* 1.0, CH<sub>2</sub>Cl<sub>2</sub>); <sup>1</sup>H NMR (500 MHz, CDCl<sub>3</sub>)  $\delta$  1.05 (s, 9H), 3.29–3.34 (m, 1H), 3.52–3.57 (m, 1H), 4.37–4.42 (m, 2H), 5.59 (s, 1H), 6.02 (d, *J* = 7.5 Hz, 1H), 6.66 (t, *J* = 7.5 Hz, 1H), 6.89 (t, *J* = 7.5 Hz, 1H), 6.98 (d, *J* = 7.0 Hz, 1H), 7.21 (t, *J* = 7.5 Hz, 2H), 7.28–7.32 (m, 4H), 7.41 (d, *J* = 7.0 Hz, 2H), 7.46–7.49 (m, 4H), 7.58 (t, *J* = 7.5 Hz, 1H), 7.99–8.01 (m, 2H); <sup>13</sup>C NMR (125 MHz, CDCl<sub>3</sub>)  $\delta$  197.7, 170.6, 151.4, 142.8, 140.5, 136.8, 133.5, 131.2, 129.8, 128.9, 128.8, 128.2, 127.9, 127.7, 127.2, 127.1, 122.1, 118.1, 109.7, 81.5, 69.9, 67.2, 39.6, 38.7, 28.0; MS (ESI) *m/z* 503.98 [*M*]<sup>+</sup>; IR (KBr)  $\nu$  3052, 3027, 2958, 2924, 2858, 1728, 1689, 1604, 1480, 1451, 1367, 1217, 1146, 1028, 1001, 845, 746, 704 cm<sup>-1</sup>; *dr* = 98/2, *er* = 95/5, determined by HPLC analysis (Chiralpak OD-H, *n*-hexane/2-propanol = 90/10, 0.8 ml/min, 254 nm UV detector), *t*<sub>R</sub> = 11.4 min (minor) and *t*<sub>R</sub> = 16.8 min (major).

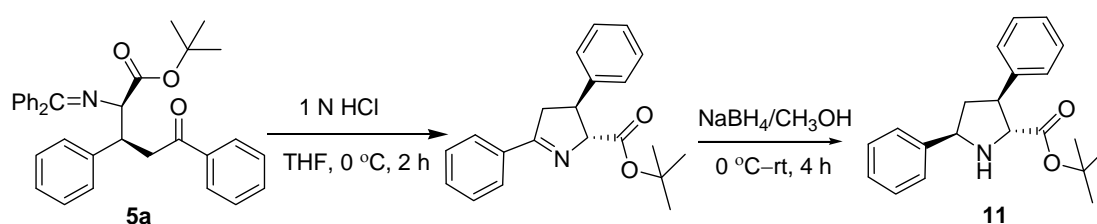

**(2*R*,3*S*,5*R*)-*tert*-Butyl 3,5-diphenylpyrrolidine-2-carboxylate (11):** 1 N hydrochloric acid (2.0 mL) was added to a solution of **5a** (100.7mg, 0.2 mmol) in THF (2.0 mL) at 0 °C, and stirring was maintained for 2 h. The resulting mixture was neutralized by addition of solid NaHCO<sub>3</sub> and extracted with CH<sub>2</sub>Cl<sub>2</sub>. The organic extracts were dried over MgSO<sub>4</sub> and concentrated. The residue was purified by column chromatography on silica gel (AcOEt/petroleum ether = 1/20 as eluant) to afford (2*R*,3*S*)-*tert*-butyl 3,5-diphenyl-3,4-dihydro-2*H*-pyrrole-2-carboxylate in



quantitative yield. To a solution of (2*R*,3*S*)-*tert*-butyl 3,5-diphenyl-3,4-dihydro-2*H*-pyrrole-2-carboxylate (64.3 mg, 0.2 mmol) in 2 mL of MeOH was added NaBH<sub>4</sub> (37.8 mg 1.0 mmol) in portions at 0 °C. The resultant mixture was stirred for 4 h at room temperature (monitored by TLC). The mixture was evaporated *in vacuo*, added water (5 mL), and extracted with dichloromethane (5 mL × 3), washed with brine and dried with MgSO<sub>4</sub>. Concentration and flash chromatography (AcOEt/petroleum ether = 1/20 as eluant) afforded (2*R*,3*S*,5*R*)-*tert*-butyl 3,5-diphenylpyrrolidine-2-carboxylate **11** (37.6 mg, 0.116 mmol, 58% yield) as a colorless oil.  $[\alpha]_D^{20} +18.6$  (*c* 1.0, CH<sub>2</sub>Cl<sub>2</sub>); <sup>1</sup>H NMR (400 MHz, CDCl<sub>3</sub>) δ 1.44 (s, 9H), 2.01–2.10 (m, 1H), 2.62–2.65 (m, 1H), 2.81 (s, 1H), 3.45 (d, *J* = 7.2 Hz, 1H), 3.95 (d, *J* = 3.6 Hz, 1H), 4.56 (d, *J* = 5.2 Hz, 1H), 7.29 (d, *J* = 4.8 Hz, 2H), 7.39 (s, 6H), 7.52 (s, 2H); <sup>13</sup>C NMR (100 MHz, CDCl<sub>3</sub>) δ 174.3, 144.1, 142.7, 128.5, 128.4, 127.6, 127.0, 126.6, 126.5, 81.2, 67.9, 62.4, 51.1, 45.1, 28.0; MS (ESI) *m/z* 324.19 [M + 1]<sup>+</sup>; IR (KBr) ν 3344, 3061, 3028, 2977, 2932, 1725, 1603, 1492, 1457, 1367, 1228, 1157, 1028, 846, 753, 699 cm<sup>-1</sup>; *er* = 96/4 determined by HPLC analysis (Chiralpak AD-H, *n*-hexane/2-propanol = 95/5, 1.0 ml/min, 254 nm UV detector), *t*<sub>R</sub> = 7.4 min (major) and *t*<sub>R</sub> = 10.7 min (minor).

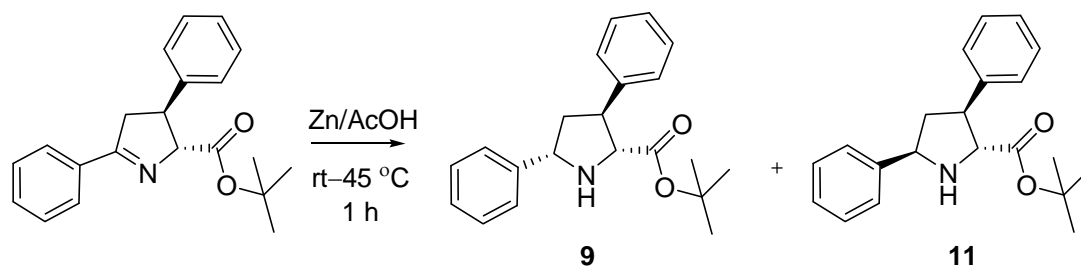

***tert*-Butyl 3,5-diphenylpyrrolidine-2-carboxylate:** To a solution of (2*R*,3*S*)-*tert*-butyl 3,5-diphenyl-3,4-dihydro-2*H*-pyrrole-2-carboxylate (64.3 mg, 0.2 mmol) in 2 mL of AcOH was added Zinc powder (30 equiv) in portions at room temperature. The resultant mixture was stirred for 1 h at 45 °C (monitored by TLC). After Zinc powder was filtered off, the filtrate was cooled to 0 °C. The filtrate was diluted with ethyl acetate and neutralized by the addition of sodium hydrogen carbonate (70% saturated *aq*). The mixture was extracted with dichloromethane (10

mL  $\times$  4), washed with brine and dried with MgSO<sub>4</sub>. Concentration and flash chromatography (AcOEt/petroleum ether = 1/20–1/4 as eluant) afforded both (2*R*,3*S*,5*S*)-*tert*-butyl 3,5-diphenylpyrrolidine-2-carboxylate **9** (35.0 mg, 0.108 mmol, 54% yield) as a colorless oil and (2*R*,3*S*,5*R*)-*tert*-butyl 3,5-diphenylpyrrolidine-2-carboxylate **11** (11.1 mg, 0.034 mmol, 17% yield).

(2*R*,3*S*,5*S*)-*tert*-Butyl 3,5-diphenylpyrrolidine-2-carboxylate (**9**):  $[\alpha]_D^{20}$  -34.5 (*c* 1.0, CH<sub>2</sub>Cl<sub>2</sub>); <sup>1</sup>H NMR (400 MHz, CDCl<sub>3</sub>)  $\delta$  1.42 (s, 9H), 2.25–2.32 (m, 1H), 2.39–2.46 (m, 1H), 2.50 (s, 1H), 3.46–3.52 (m, 1H), 3.90 (d, *J* = 7.6 Hz, 1H), 4.55 (t, *J* = 7.6 Hz, 1H), 7.28–7.31 (m, 2H), 7.34–7.41 (m, 6H), 7.51 (d, *J* = 7.6 Hz, 2H); <sup>13</sup>C NMR (100 MHz, CDCl<sub>3</sub>)  $\delta$  173.2, 143.9, 142.8, 128.6, 128.5, 127.5, 127.2, 126.7, 126.6, 81.3, 68.8, 62.4, 49.9, 43.4, 28.0; MS (ESI) *m/z* 324.07 [M + 1]<sup>+</sup>; IR (KBr)  $\nu$  3375, 3067, 2970, 2929, 1724, 1603, 1501, 1454, 1367, 1244, 1153, 1029, 845, 756, 700 cm<sup>-1</sup>; *er* = 96/4, determined by HPLC analysis (Chiralpak AD-H, *n*-hexane/2-propanol = 95/5, 1.0 ml/min, 254 nm UV detector), *t*<sub>R</sub> = 10.4 min (minor) and *t*<sub>R</sub> = 16.8 min (major).

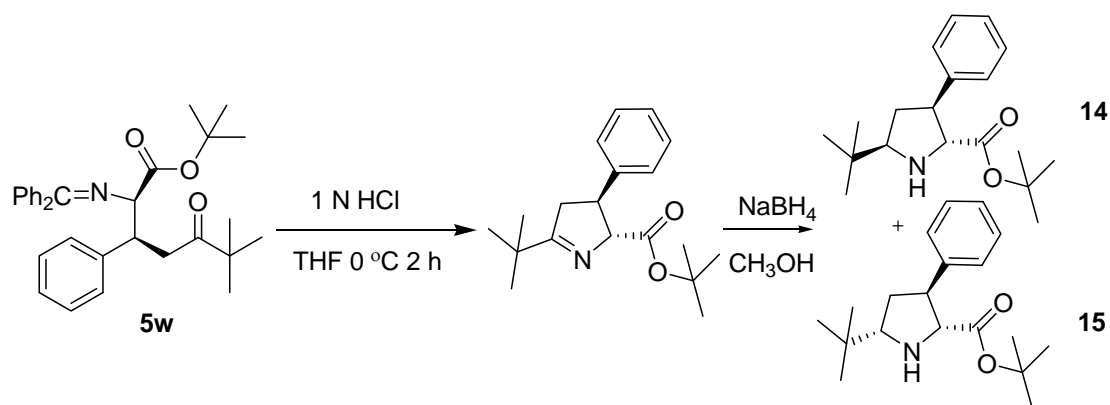

***tert*-Butyl 5-*tert*-butyl-3-phenylpyrrolidine-2-carboxylate:** 1 N hydrochloric acid (2.0 mL) was added to a solution of **5w** (96.6 mg, 0.2 mmol) in THF (2.0 mL) at 0 °C, and stirring was maintained for 2 h. The resulting mixture was neutralized by addition of solid NaHCO<sub>3</sub> and extracted with CH<sub>2</sub>Cl<sub>2</sub>. The organic extracts were dried over MgSO<sub>4</sub> and concentrated. The residue was purified by column chromatography on silica gel (AcOEt/petroleum ether = 1/10 as eluant) to afford (2*R*,3*S*)-*tert*-butyl 5-*tert*-butyl-3-phenyl-3,4-dihydro-2H-pyrrole-2-carboxylate in quantitative yield. To a solution of (2*R*,3*S*)-*tert*-butyl 5-*tert*-butyl-3-phenyl-3,4-dihydro-2H-pyrrole-2-

carboxylate (60.2 mg, 0.2 mmol) in 2 mL of MeOH was added NaBH<sub>4</sub> (37.8 mg 1.0 mmol) in portions at 0 °C. The resultant mixture was stirred for 3 h at room temperature (monitored by TLC). The mixture was evaporated *in vacuo*, added water (5 mL), and extracted with dichloromethane (5 mL × 3), washed with brine and dried with MgSO<sub>4</sub>. Concentration and flash chromatography (AcOEt/petroleum ether = 1/10 as eluant) afforded both (2*R*,3*S*,5*R*)-*tert*-butyl 5-*tert*-butyl-3-phenylpyrrolidine-2-carboxylate **14** (36.3 mg, 0.120 mmol, 60% yield) as a colorless oil and (2*R*,3*S*,5*S*)-*tert*-butyl 5-*tert*-butyl-3-phenylpyrrolidine-2-carboxylate **15** (8.6 mg, 0.028 mmol, 14% yield) as a colorless oil.

(2*R*,3*S*,5*R*)-*tert*-butyl 5-*tert*-butyl-3-phenylpyrrolidine-2-carboxylate (**14**):  $[\alpha]_D^{20}$  -37.1 (*c* 1.0, CH<sub>2</sub>Cl<sub>2</sub>); <sup>1</sup>H NMR (400 MHz, CDCl<sub>3</sub>) δ 0.95 (s, 9H), 1.31 (s, 9H), 1.76–1.84 (m, 1H), 2.14–2.20 (m, 1H), 2.50 (s, 1H), 3.13–3.21 (m, 2H), 3.66 (d, *J* = 8.8 Hz, 1H), 7.21–7.25 (m, 1H), 7.28–7.35 (m, 4H); <sup>13</sup>C NMR (100 MHz, CDCl<sub>3</sub>) δ 174.2, 142.5, 128.3, 127.5, 126.5, 80.9, 68.2, 67.9, 51.9, 37.3, 33.5, 27.9, 26.3; MS (ESI) *m/z* 304.17 [M + 1]<sup>+</sup>; IR (KBr) ν 3351, 3029, 2955, 2867, 1726, 1478, 1455, 1367, 1227, 1158, 847, 760, 699 cm<sup>-1</sup>; *er* = 91/9, determined by HPLC analysis (Chiralpak AD-H, *n*-hexane/2-propanol = 99/1, 0.8 ml/min, 254 nm UV detector), *t*<sub>R</sub> = 13.7 min (major) and *t*<sub>R</sub> = 28.0 min (minor).

(2*R*,3*S*,5*S*)-*tert*-butyl 5-*tert*-butyl-3-phenylpyrrolidine-2-carboxylate (**15**):  $[\alpha]_D^{20}$  -43.0 (*c* 1.0, CH<sub>2</sub>Cl<sub>2</sub>); <sup>1</sup>H NMR (400 MHz, CDCl<sub>3</sub>) δ 1.00 (s, 9H), 1.35 (s, 9H), 1.87–1.94 (m, 1H), 2.04–2.11 (m, 1H), 2.19 (s, 1H), 3.13–3.21 (m, 2H), 3.66 (d, *J* = 8.0 Hz, 1H), 7.22–7.28 (m, 3H), 7.30–7.34 (m, 2H); <sup>13</sup>C NMR (100 MHz, CDCl<sub>3</sub>) δ 173.0, 143.4, 128.4, 127.5, 126.4, 81.0, 69.1, 68.5, 51.1, 36.8, 33.1, 27.9, 26.5; MS (ESI) *m/z* 304.07 [M + 1]<sup>+</sup>; IR (KBr) ν 3306, 3026, 2960, 2869, 1727, 1476, 1458, 1367, 1255, 1158, 848, 761, 699 cm<sup>-1</sup>; *er* = 91/9, determined by HPLC analysis (Chiralpak AD-H, *n*-hexane/2-propanol = 99/1, 0.8 ml/min, 254 nm UV detector), *t*<sub>R</sub> = 8.5 min (minor) and *t*<sub>R</sub> = 9.9 min (major).

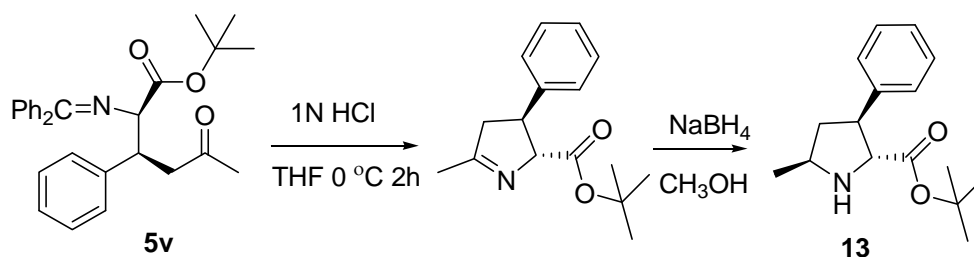

**(2R,3S,5S)-tert-Butyl 5-methyl-3-phenylpyrrolidine-2-carboxylate (13):** 1N hydrochloric acid (2.0 mL) was added to a solution of **5v** (88.4 mg, 0.2 mmol) in THF (2.0 mL) at 0 °C, and stirring was maintained for 2 h. The resulting mixture was neutralized by addition of solid NaHCO<sub>3</sub> and extracted with CH<sub>2</sub>Cl<sub>2</sub>. The organic extracts were dried over MgSO<sub>4</sub> and concentrated. The residue was purified by column chromatography on silica gel (AcOEt/petroleum ether = 1/1 as eluant) to afford (2R,3S)-tert-butyl 5-methyl-3-phenyl-3,4-dihydro-2H-pyrrole-2-carboxylate in quantitative yield. To a solution of (2R,3S)-tert-butyl 5-methyl-3-phenyl-3,4-dihydro-2H-pyrrole-2-carboxylate (51.9 mg, 0.2 mmol) in 2 mL of MeOH was added NaBH<sub>4</sub> (37.8 mg 1.0 mmol) in portions at 0 °C. The resultant mixture was stirred for 1.5 h at room temperature (monitored by TLC). The mixture was evaporated *in vacuo*, added water (5 mL), and extracted with dichloromethane (5 mL × 3), washed with brine and dried with MgSO<sub>4</sub>. Concentration and flash chromatography (AcOEt/petroleum ether = 1/1 as eluant) afforded the product **13** (30.8 mg, 0.118 mmol, 59% yield) as a colorless oil.  $[\alpha]_D^{20} -45.1$  (*c* 1.0, CH<sub>2</sub>Cl<sub>2</sub>); <sup>1</sup>H NMR (400 MHz, CDCl<sub>3</sub>) δ 1.23 (d, *J* = 6.0 Hz, 3H), 1.35 (s, 9H), 1.59–1.67 (m, 1H), 2.26–2.33 (m, 1H), 3.15 (s, 1H), 3.21–3.28 (m, 1H), 3.46–3.51 (m, 1H), 3.73 (d, *J* = 7.6 Hz, 1H), 7.18–7.22 (m, 1H), 7.30 (d, *J* = 4.4 Hz, 4H); <sup>13</sup>C NMR (100 MHz, CDCl<sub>3</sub>) δ 174.2, 142.9, 128.4, 127.5, 126.5, 81.0, 67.6, 54.3, 51.4, 43.9, 27.9, 21.3; MS (ESI) *m/z* 262.16 [M + 1]<sup>+</sup>; IR (KBr) ν 3342, 3063, 3029, 2967, 2929, 1725, 1603, 1494, 1456, 1368, 1229, 1160, 1137, 958, 848, 760, 700 cm<sup>-1</sup>; *er* = 90/10, determined by HPLC analysis (Chiralpak AD-H, *n*-hexane/2-propanol = 95/5, 1.0 ml/min, 254 nm UV detector), *t<sub>R</sub>* = 8.4 min (major) and *t<sub>R</sub>* = 9.7 min (minor).

## 7. References:

1. a) M.-Q. Hua, H.-F. Cui, L. Wang, J. Nie, J.-A. Ma, *Angew. Chem., Int. Ed.* 2010, **49**, 2772.  
b) T. Ooi, M. Kameda, K. Maruoka, *J. Am. Chem. Soc.* 2003, **125**, 5139.  
c) T. Ooi, K. Maruoka, *Angew. Chem. Int. Ed.* 2007, **46**, 4222.  
d) T. Hashimoto, K. Maruoka, *Chem. Rev.* 2007, **107**, 5656.
2. a) R. Viswanathan, E. N. Prabhakaran, M. A. Plotkin, J. N. Johnston, *J. Am. Chem. Soc.* 2003, **125**, 163.  
b) R. Viswanathan, C. R. Smith, E. N. Prabhakaran, J. N. Johnston, *J. Org. Chem.* 2008, **73**, 3040.

## 8. NMR Spectra and HPLC Charts for the Addition Adducts

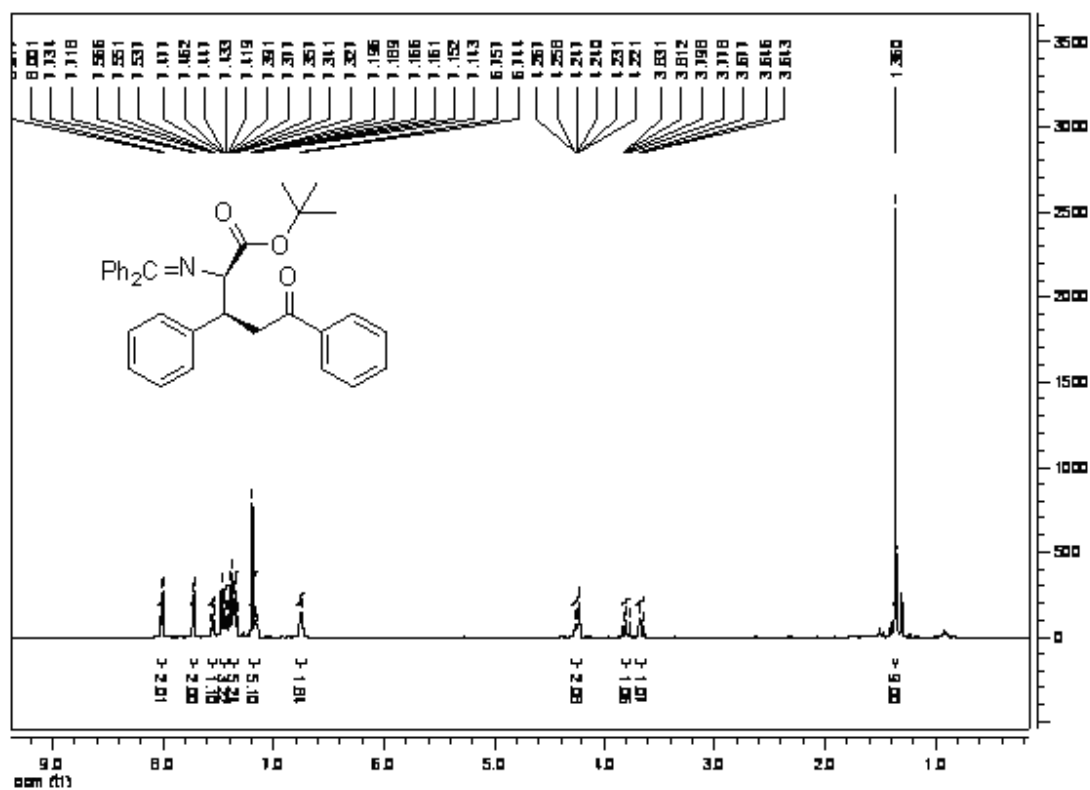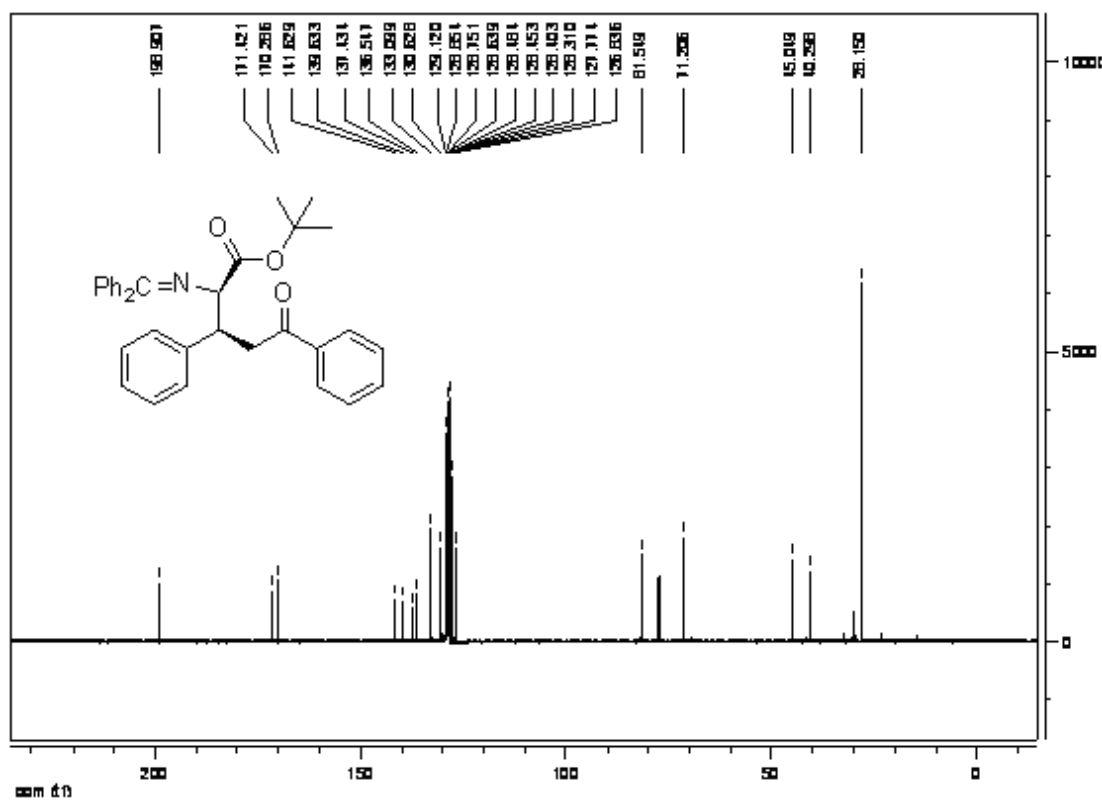

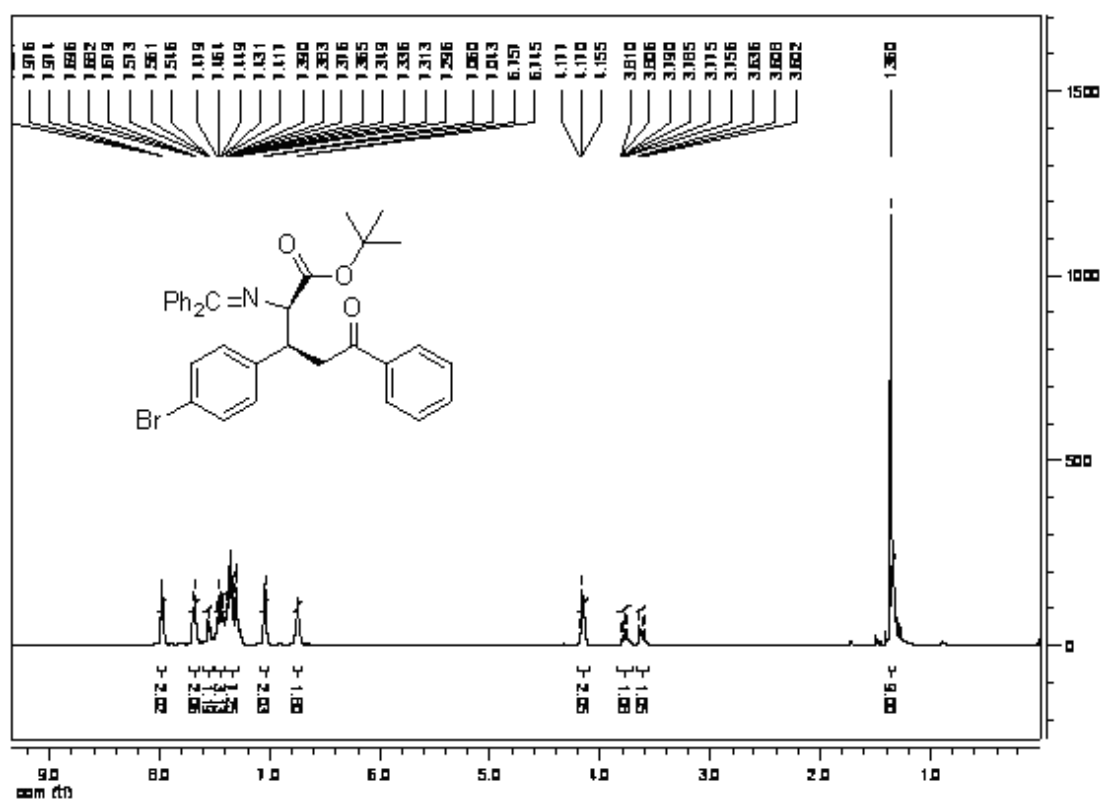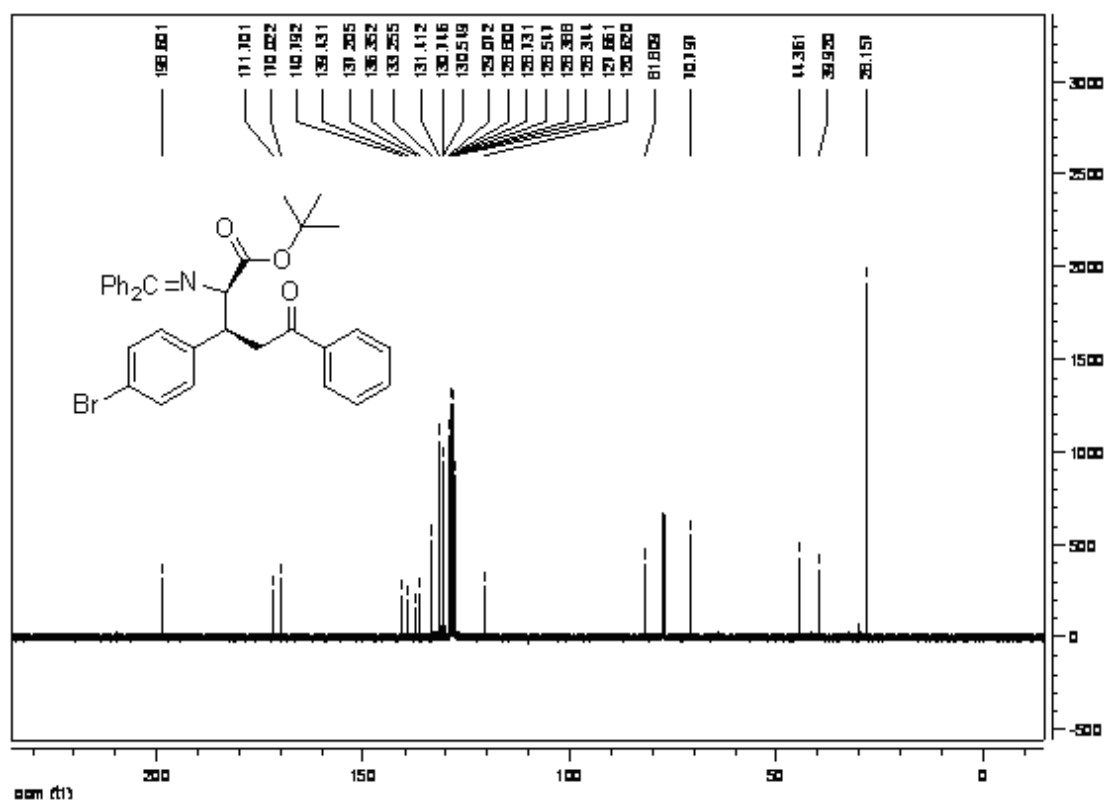

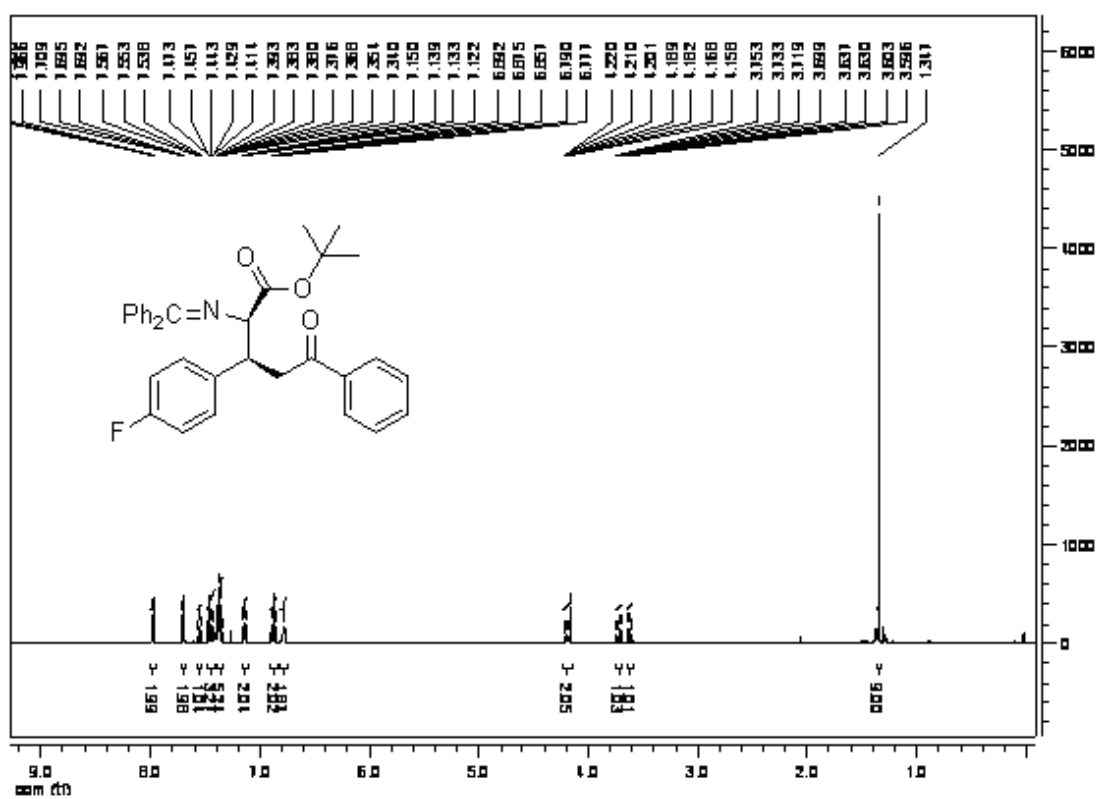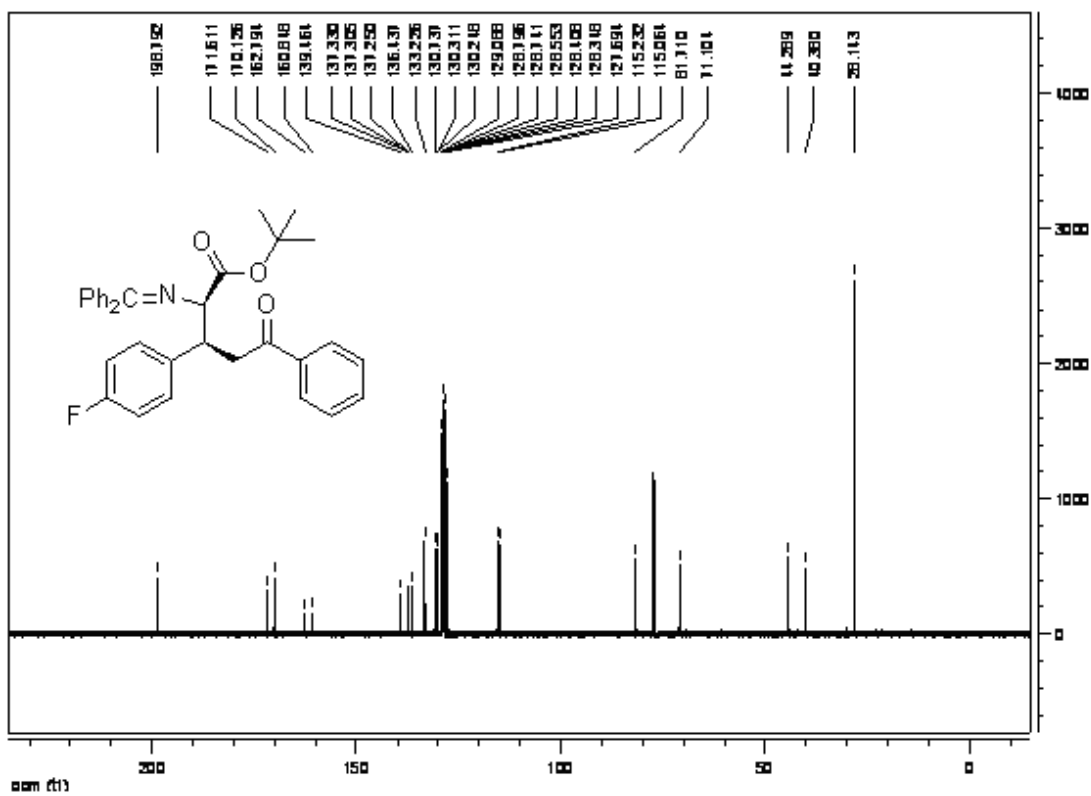



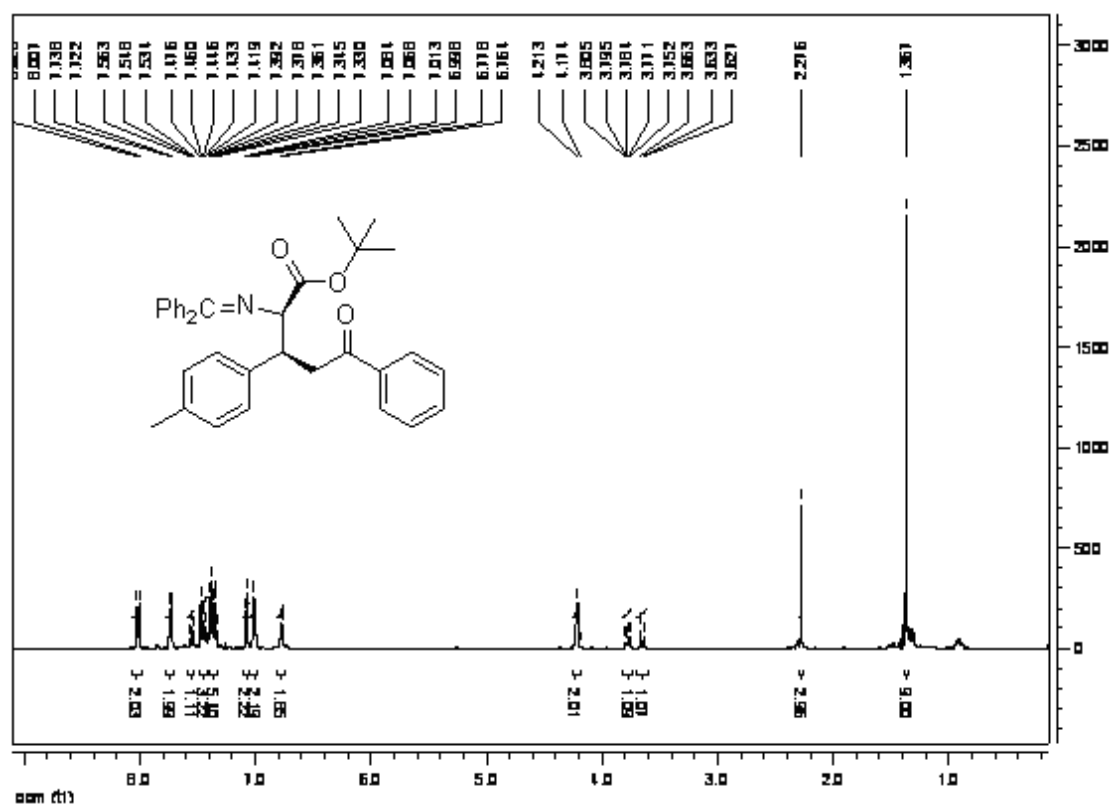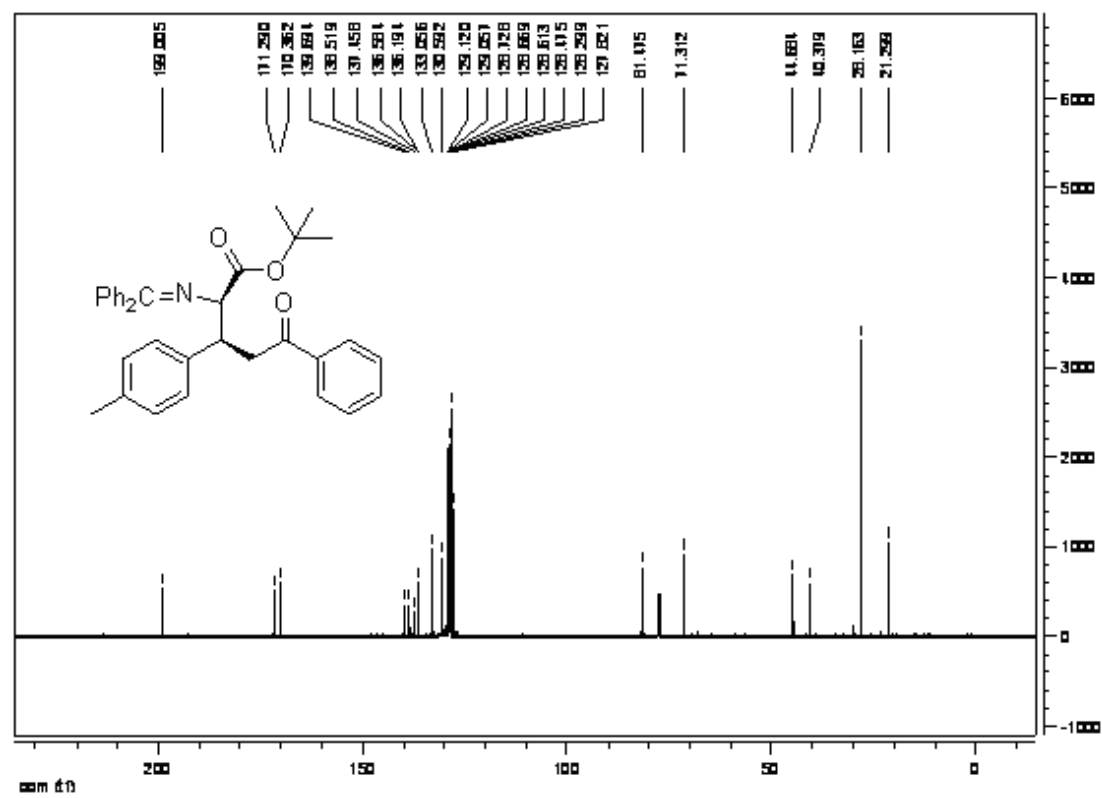

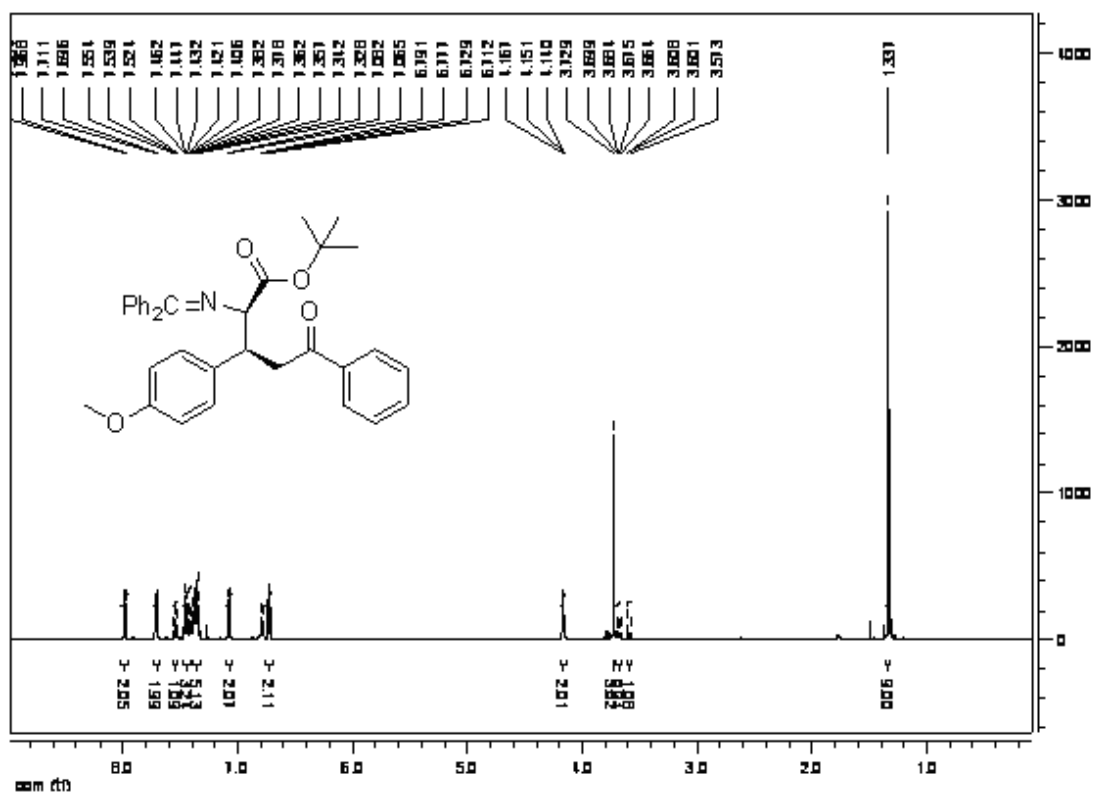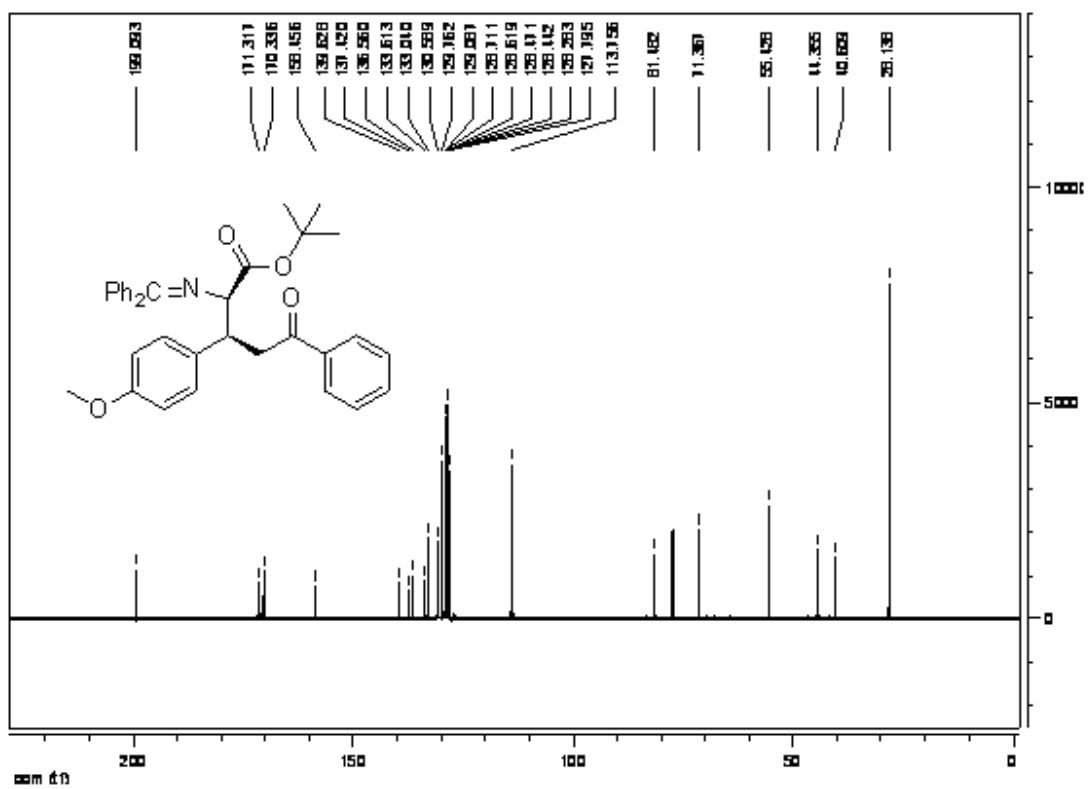

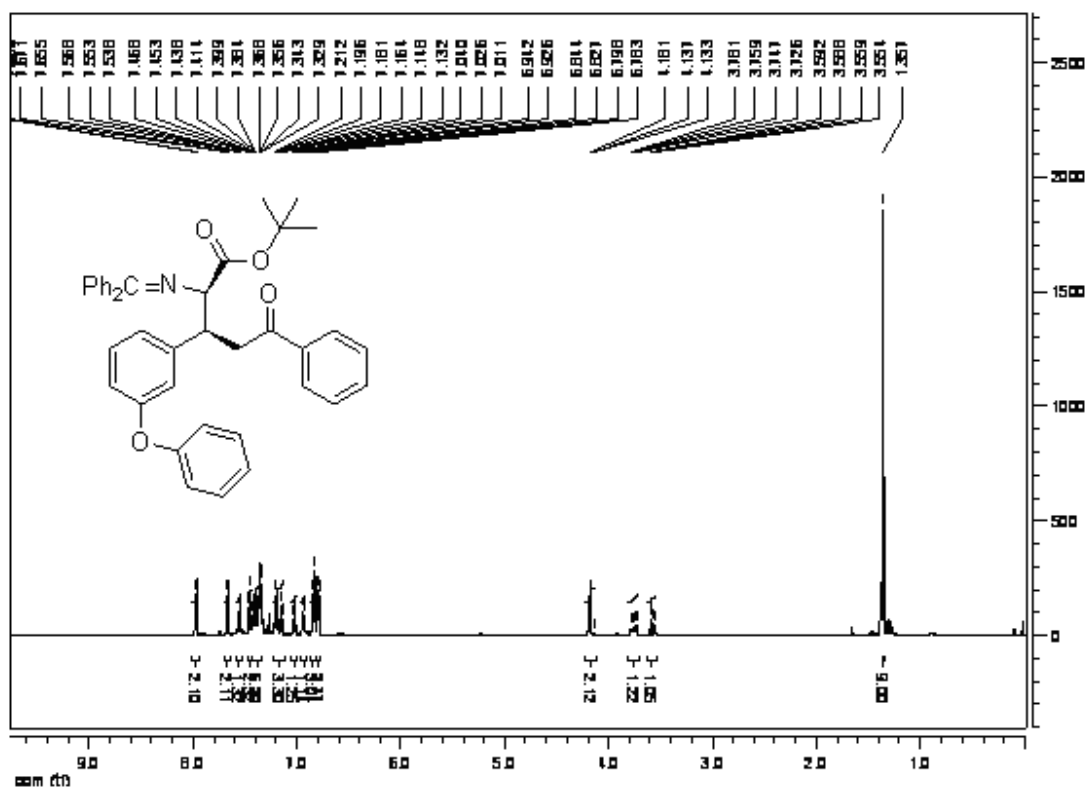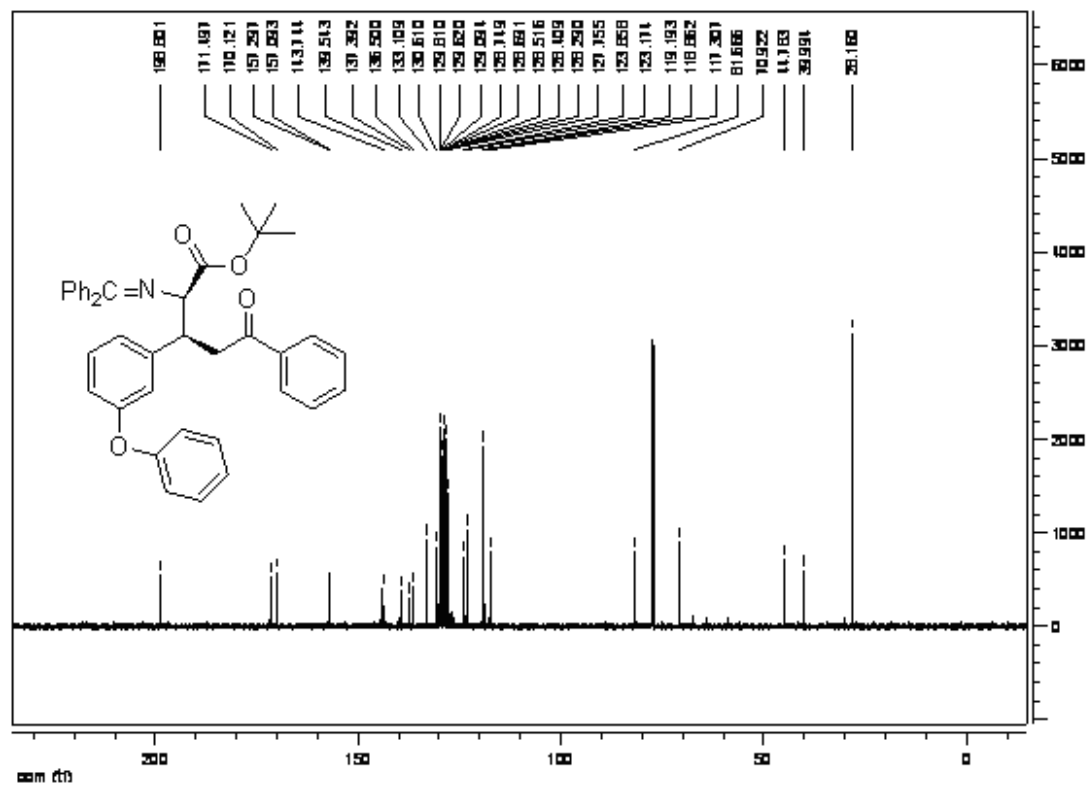

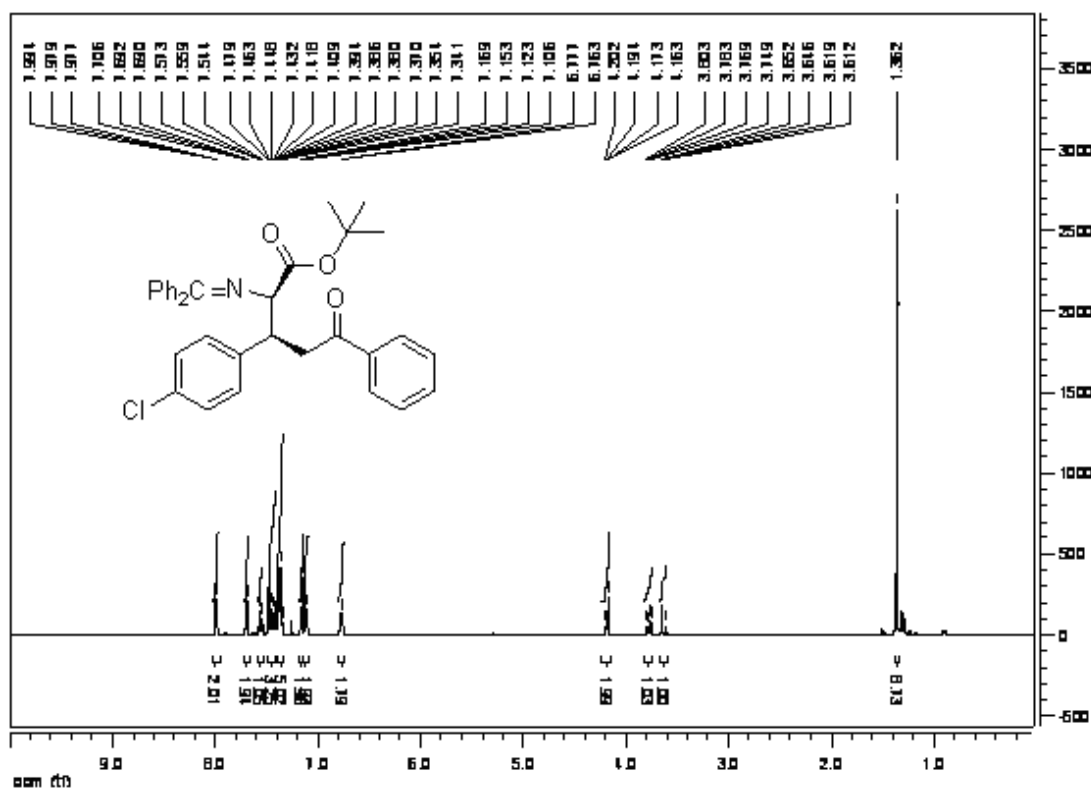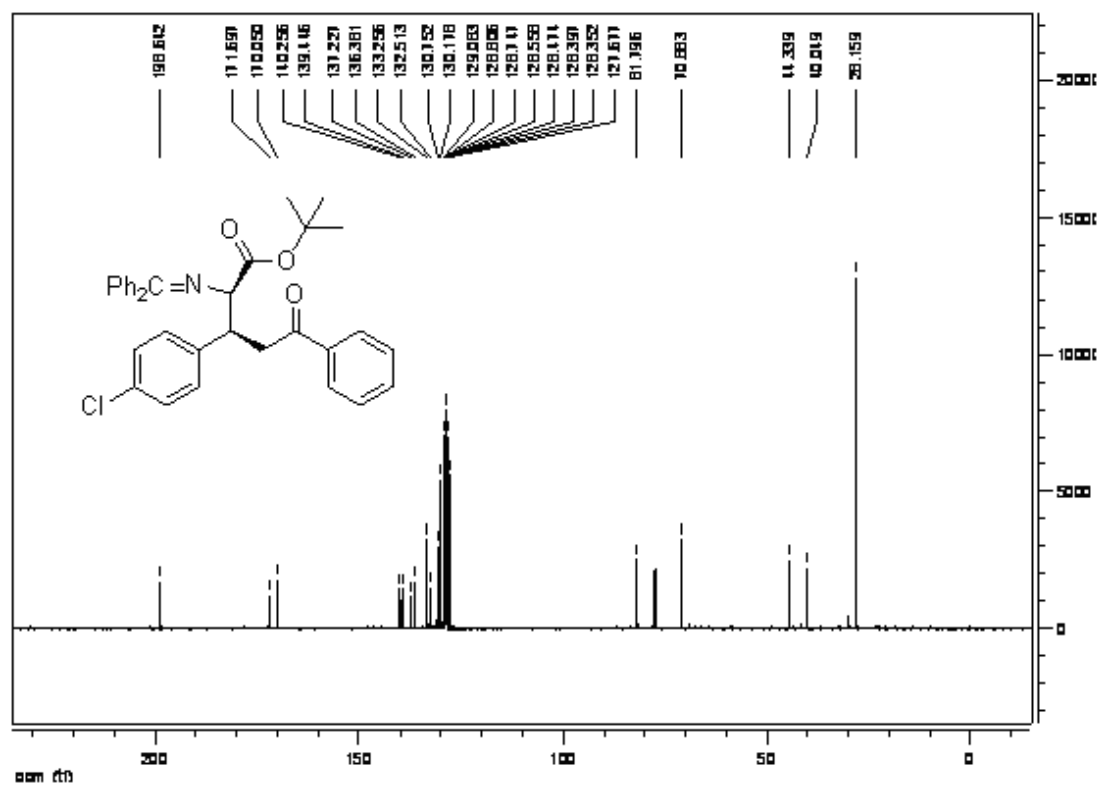

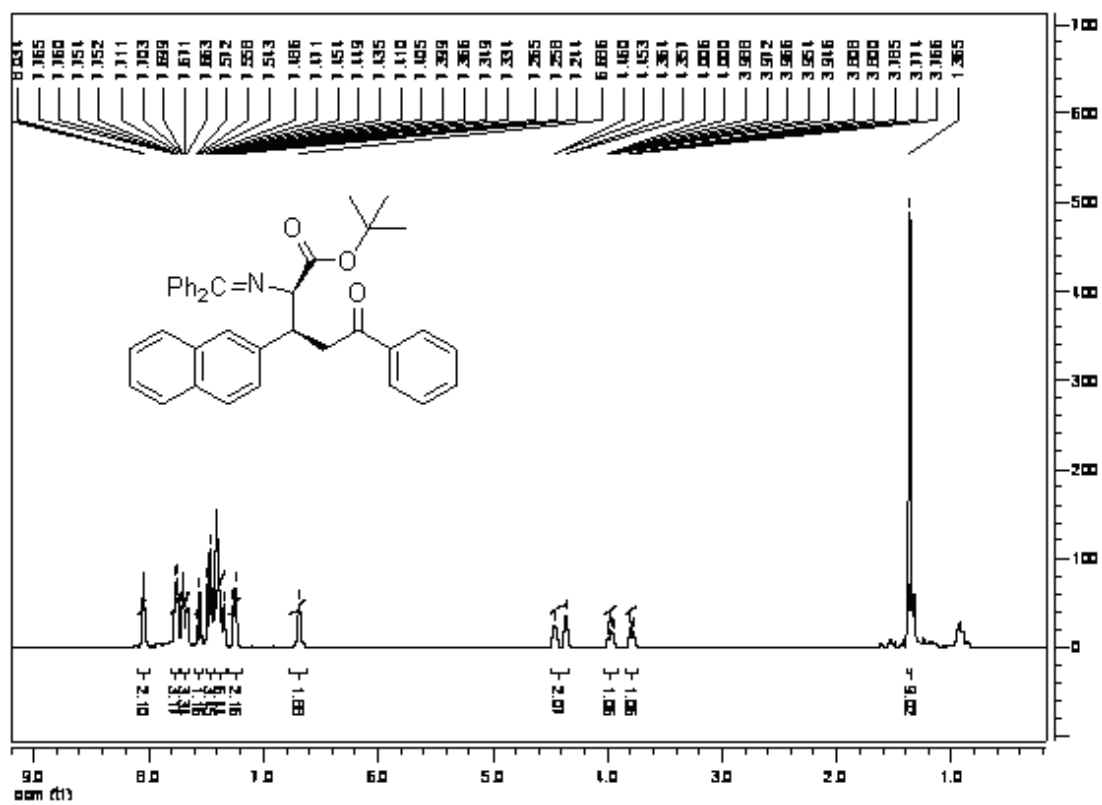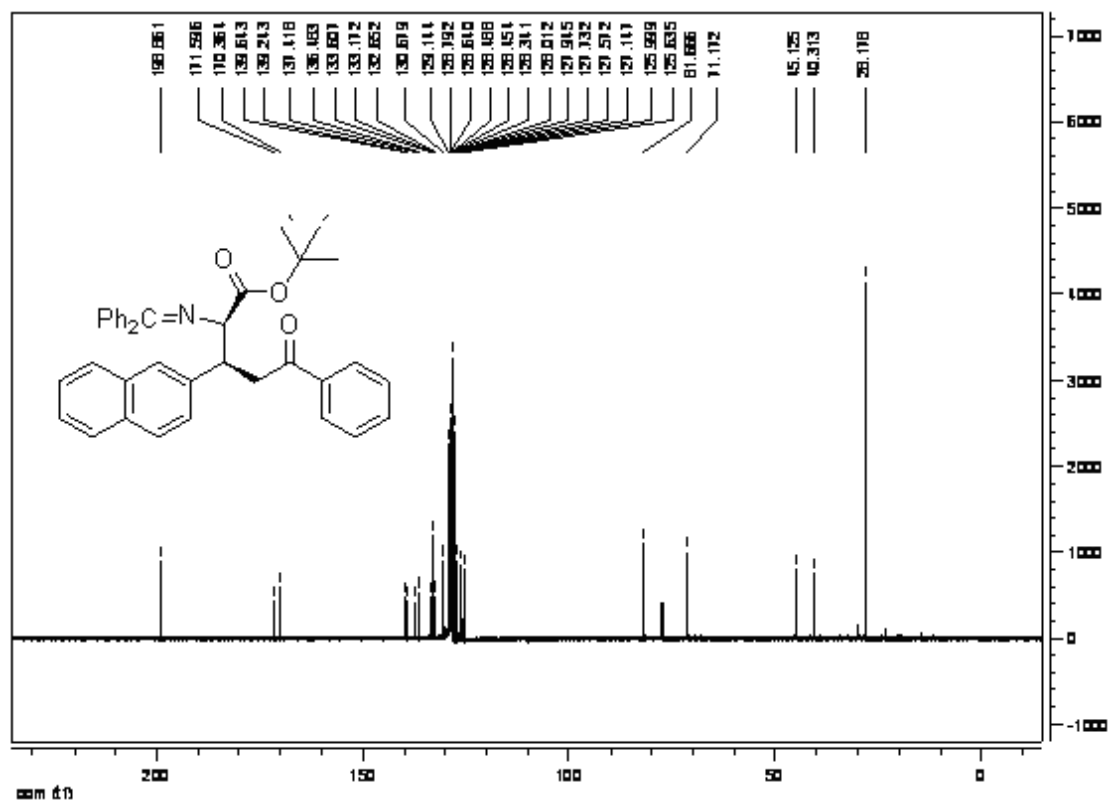

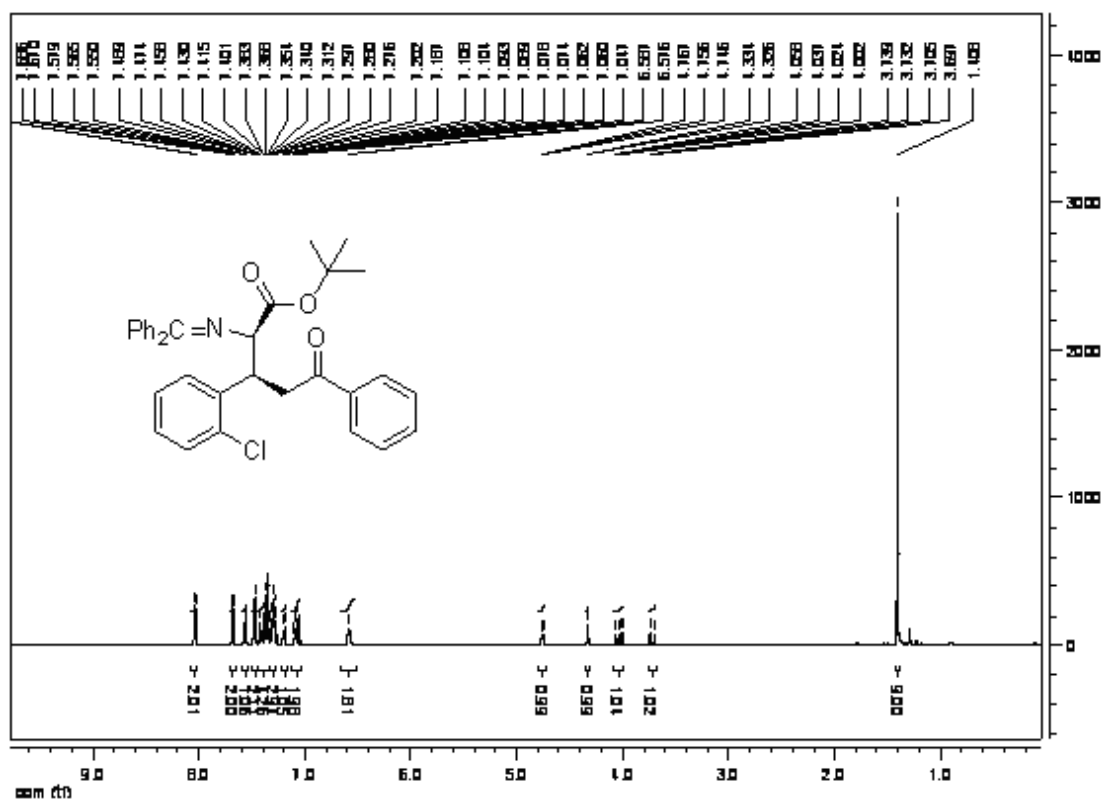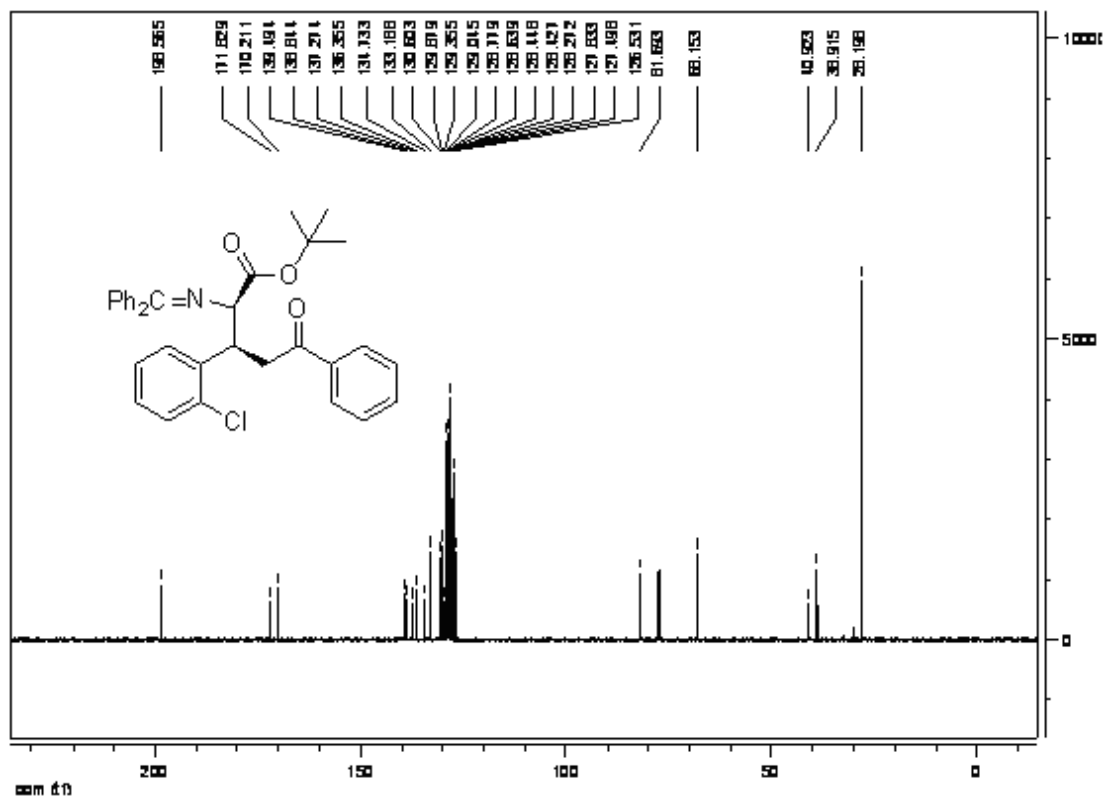

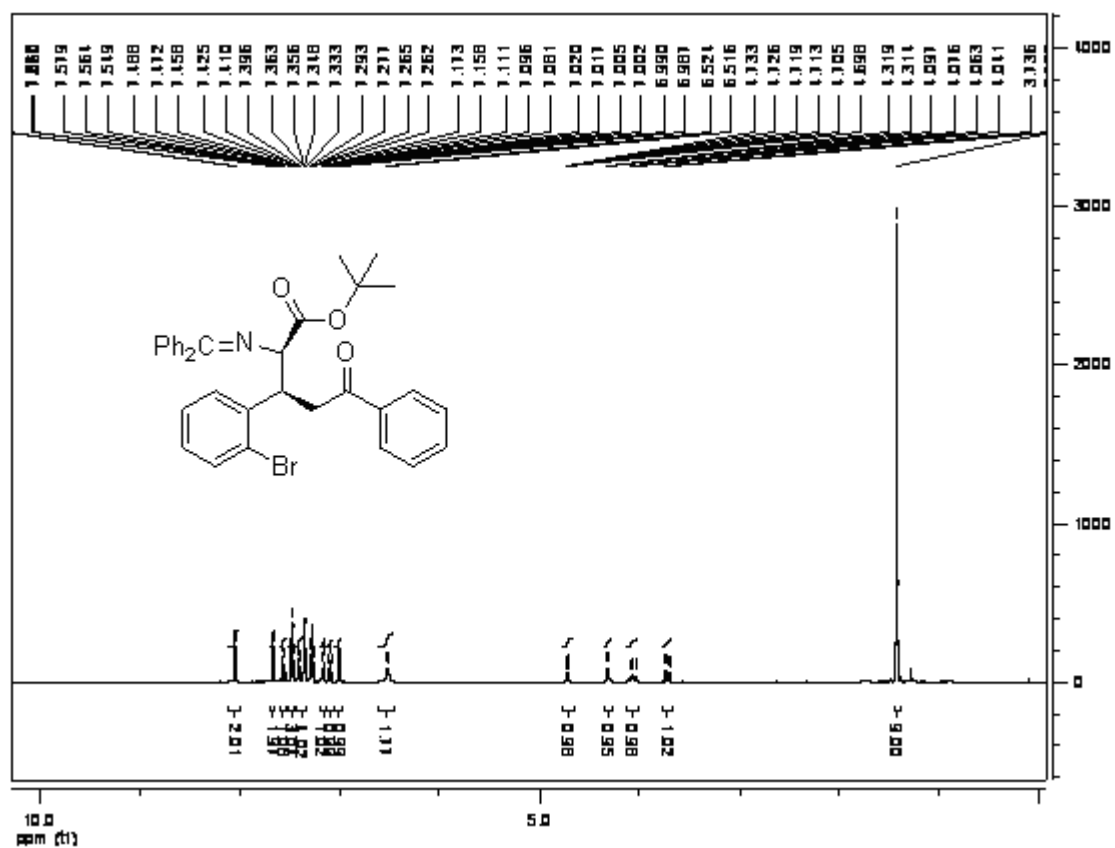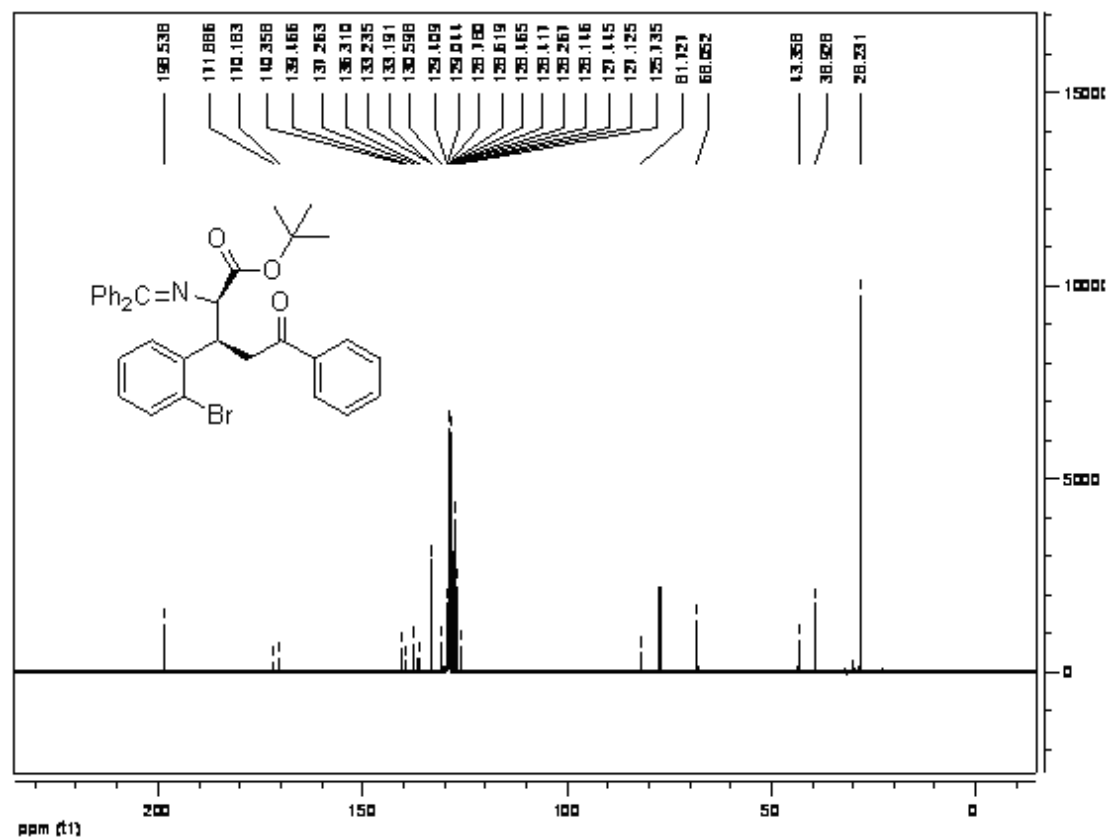

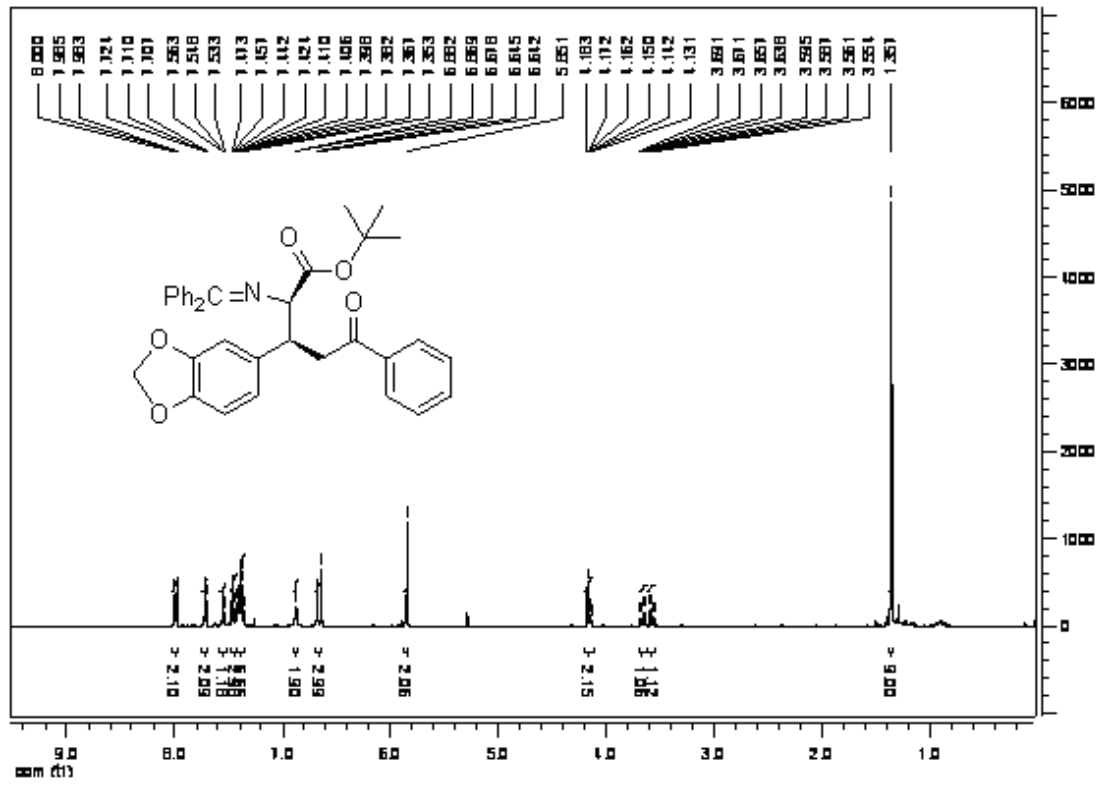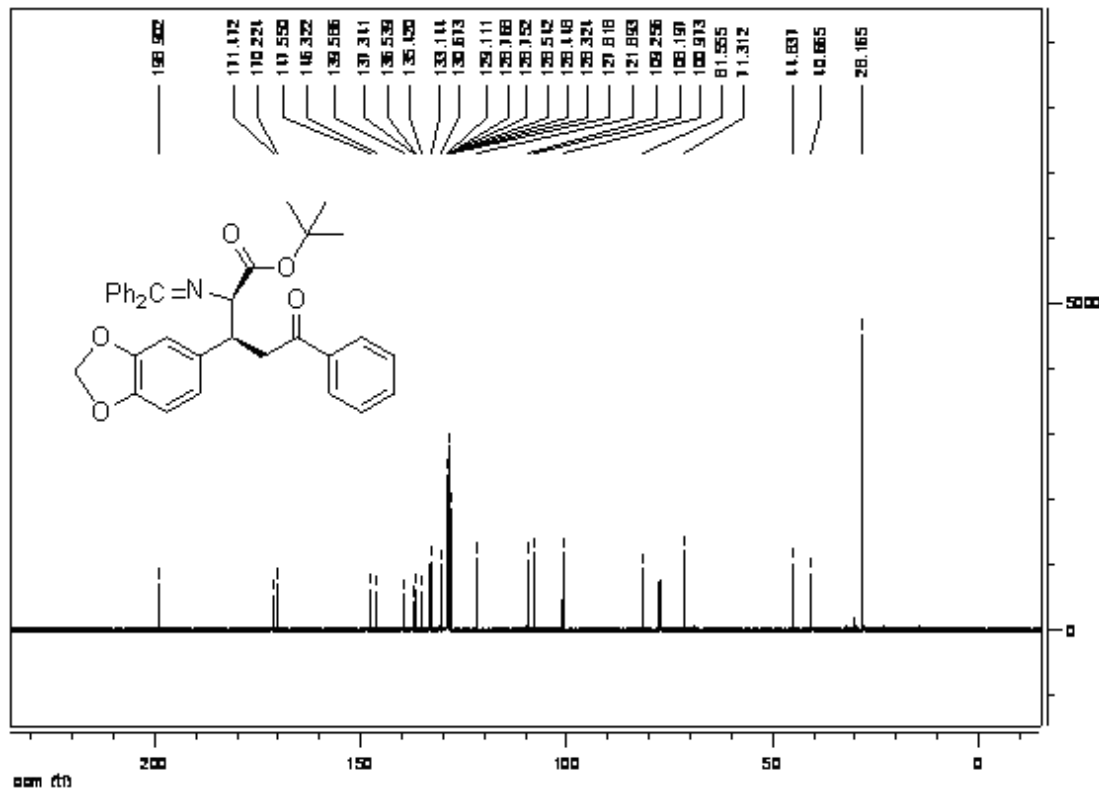





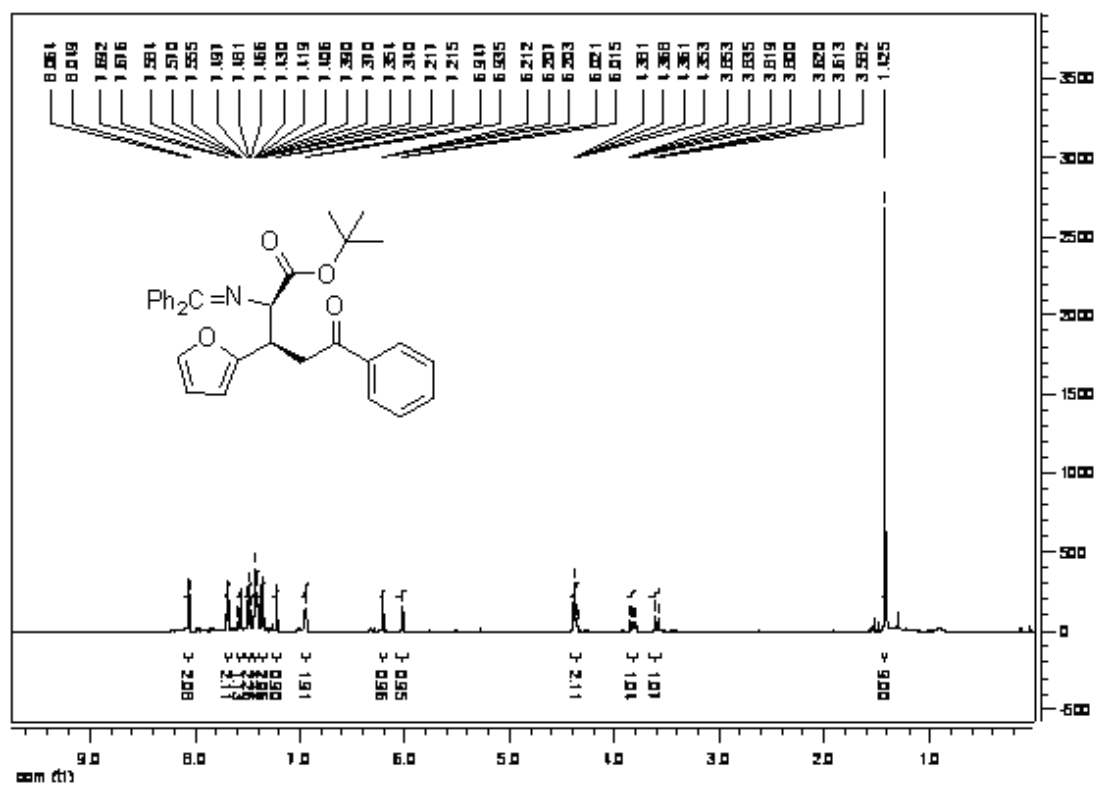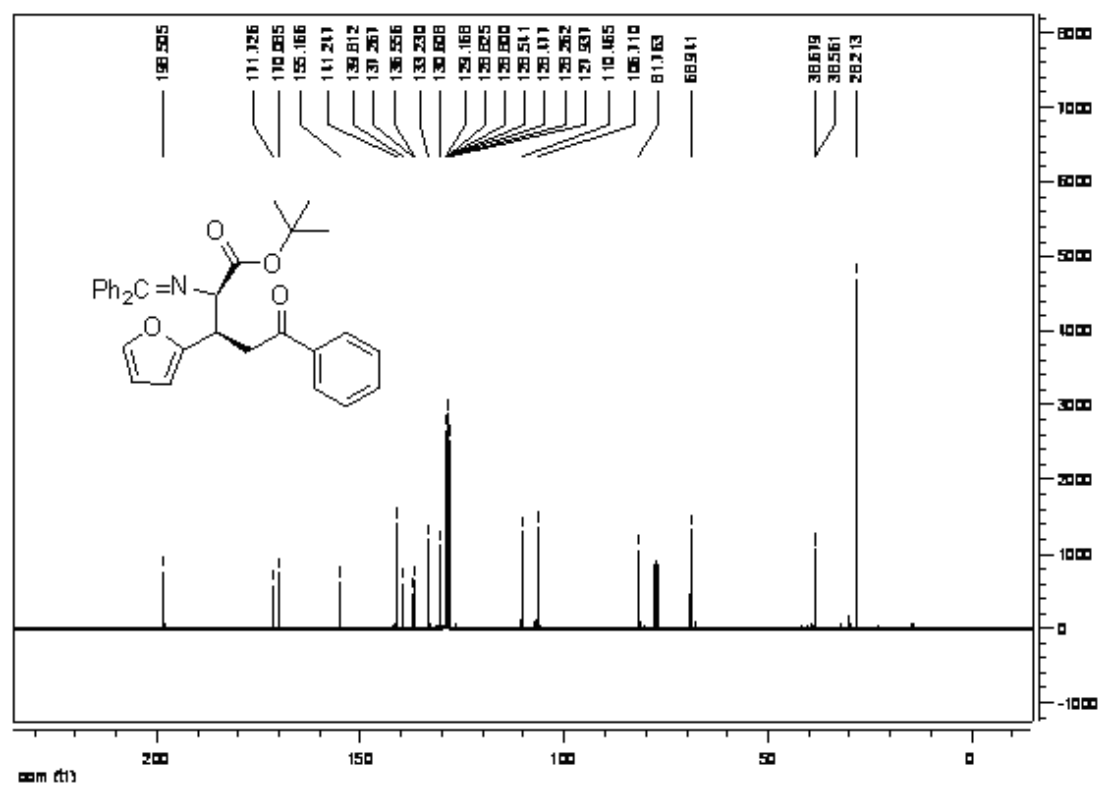

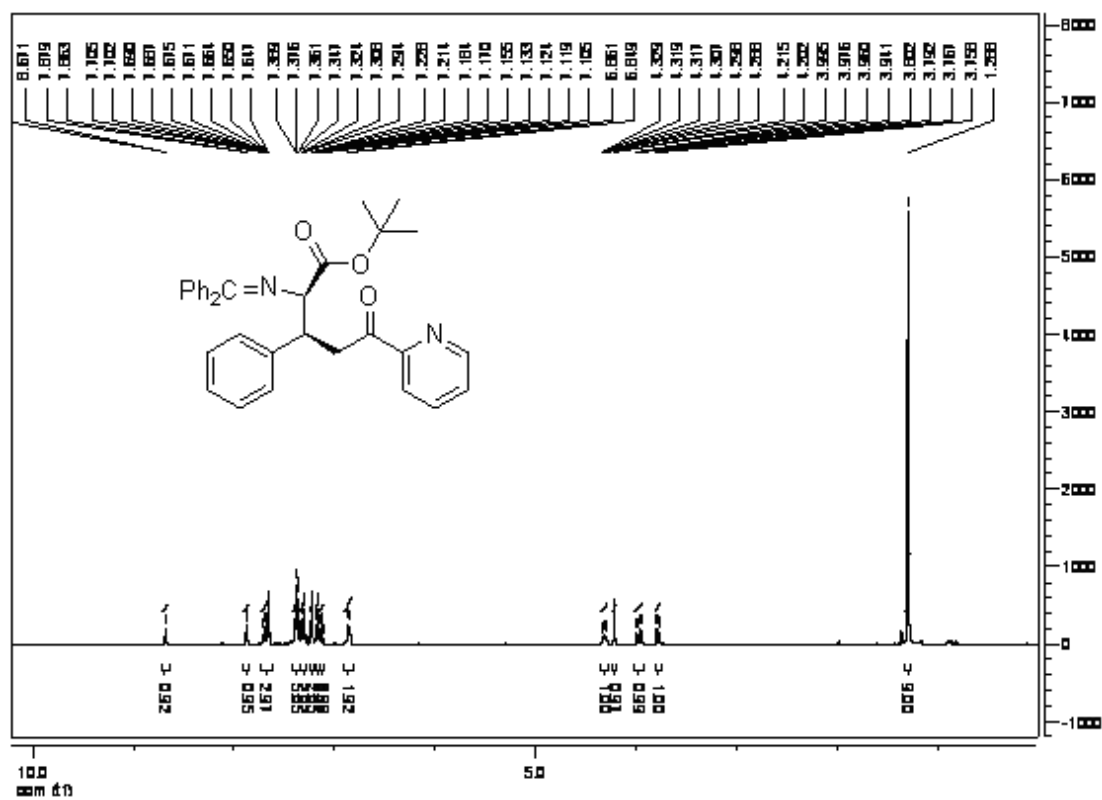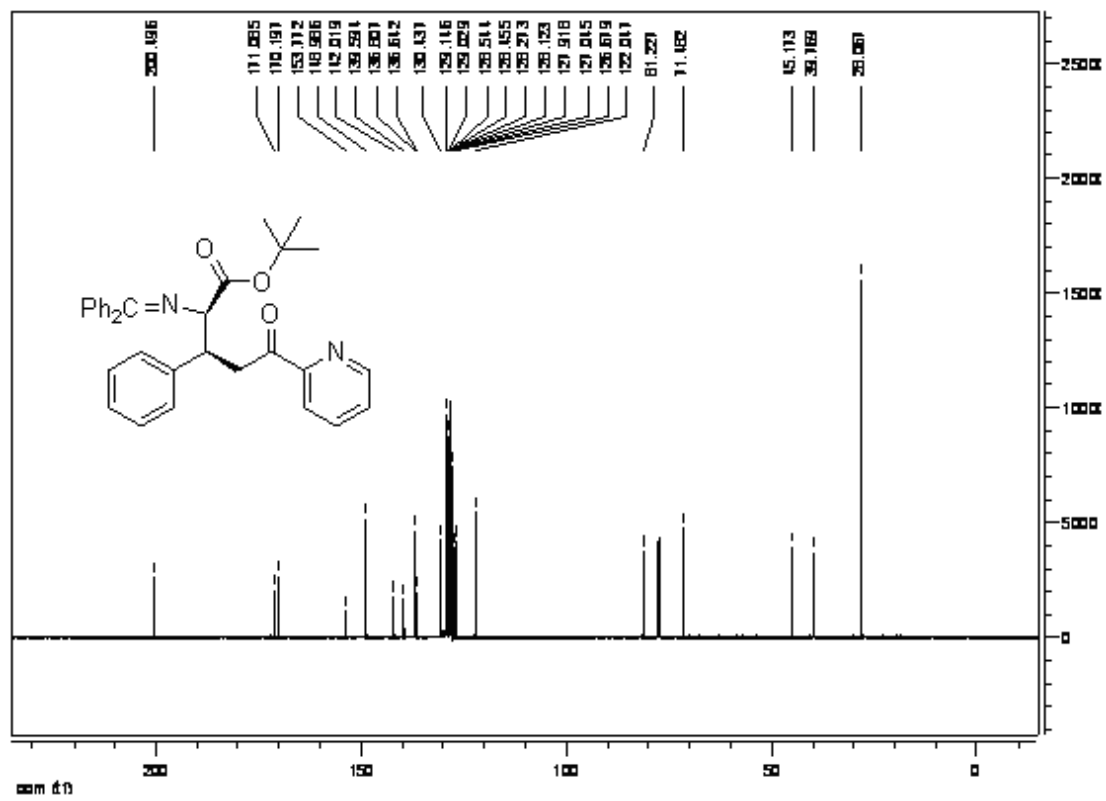

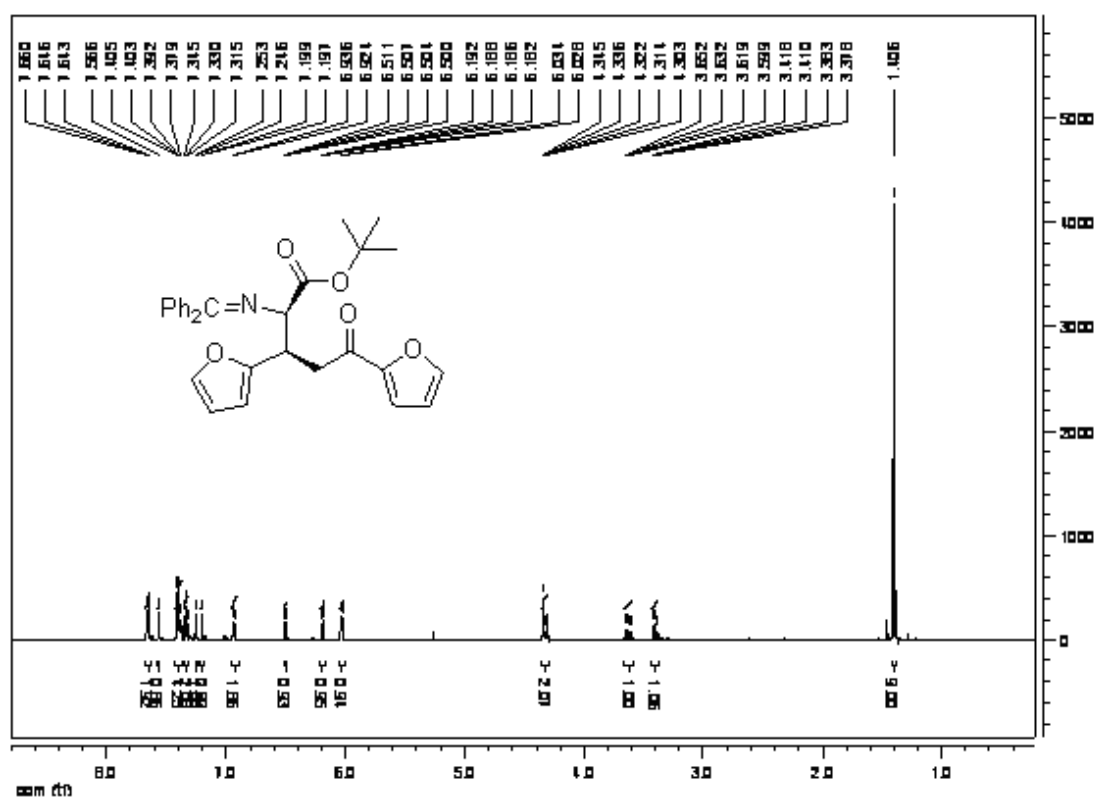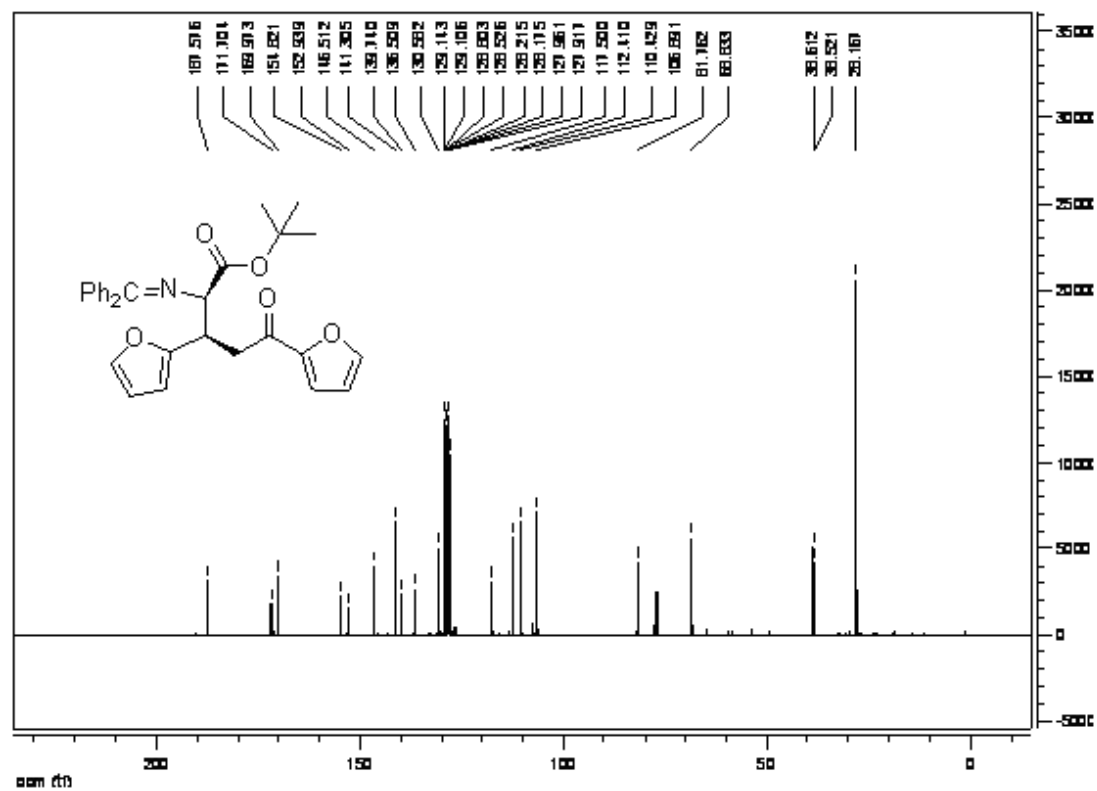

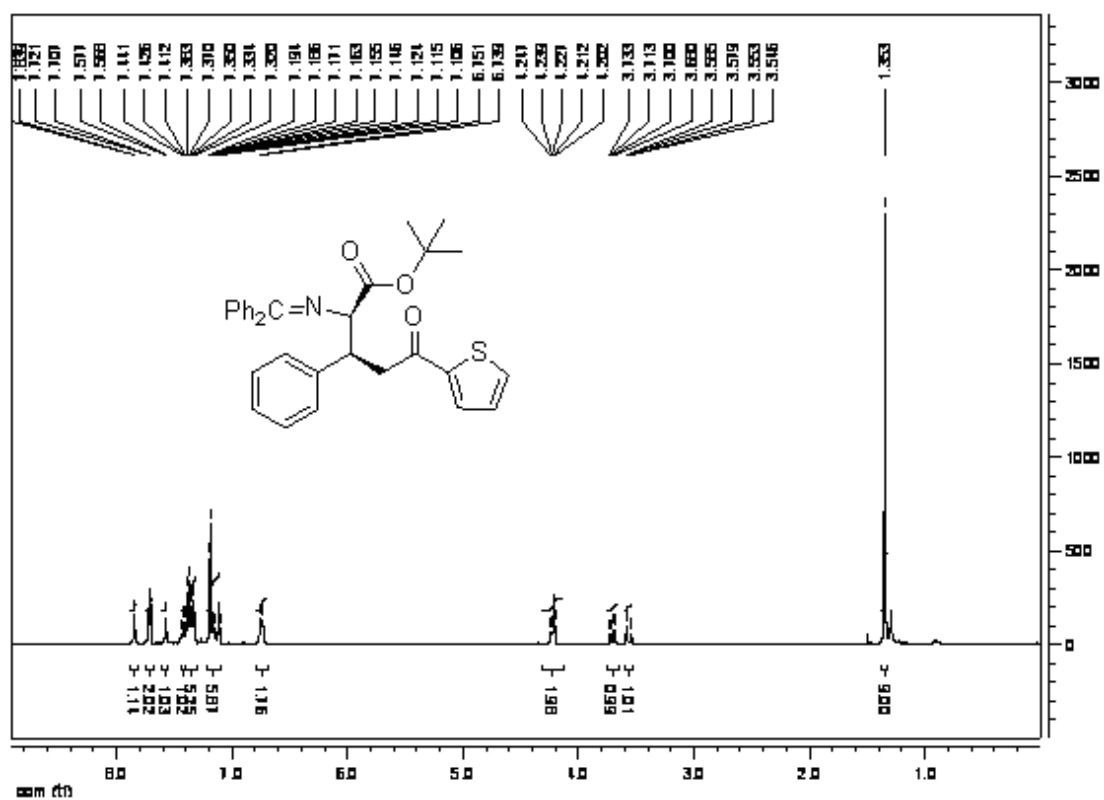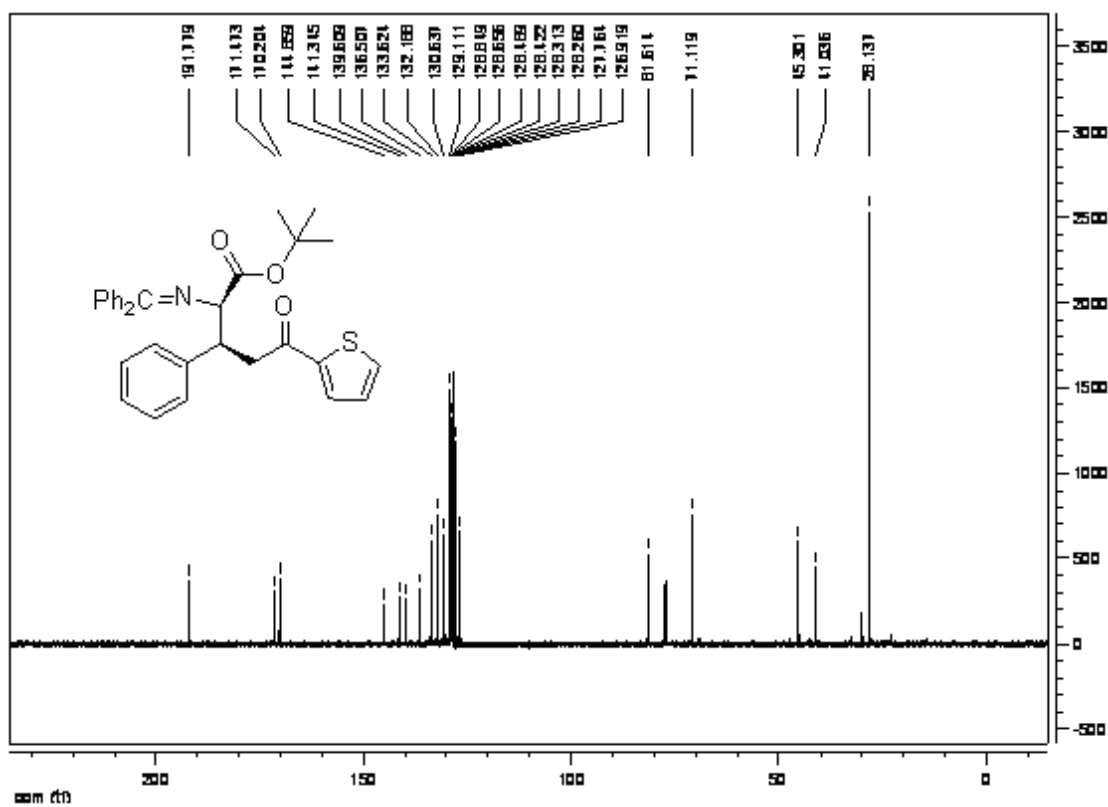

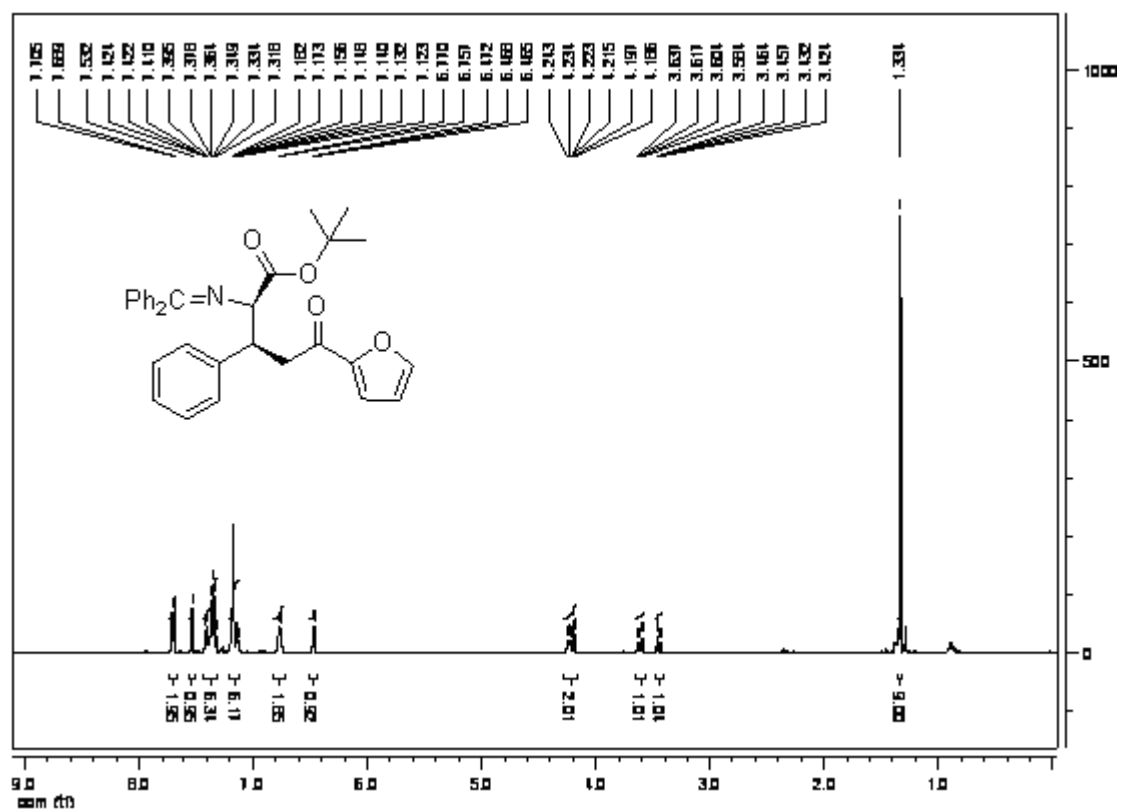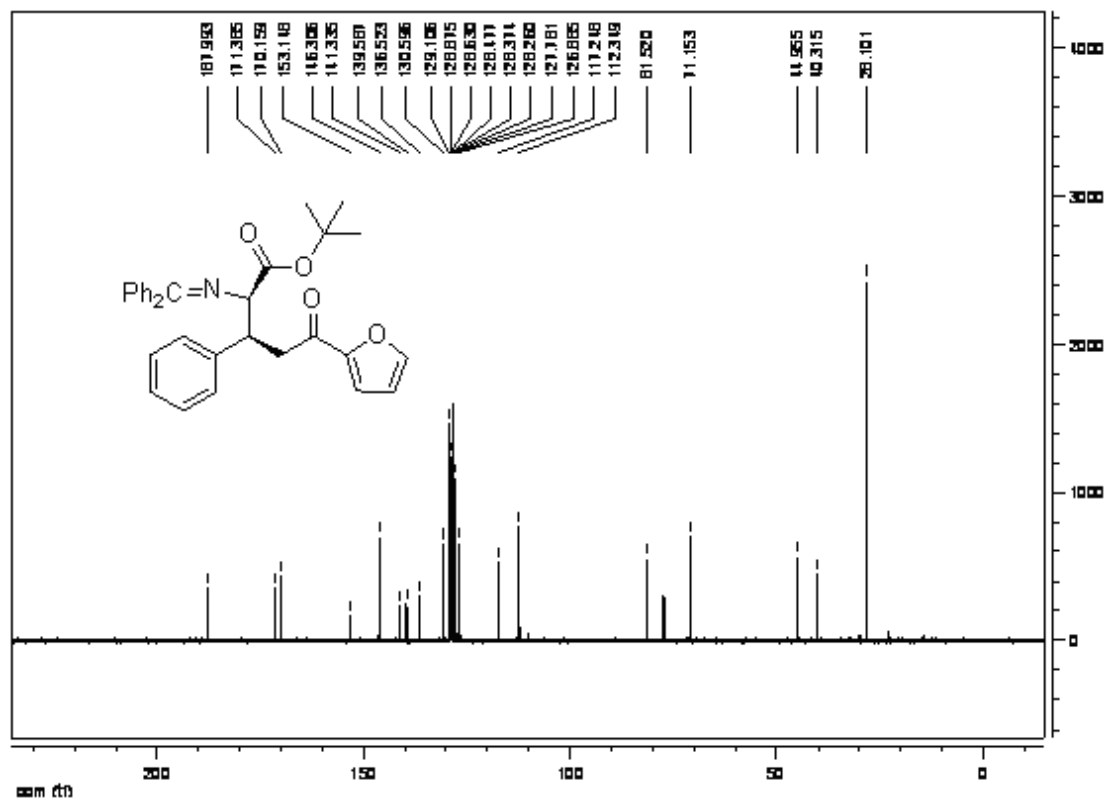



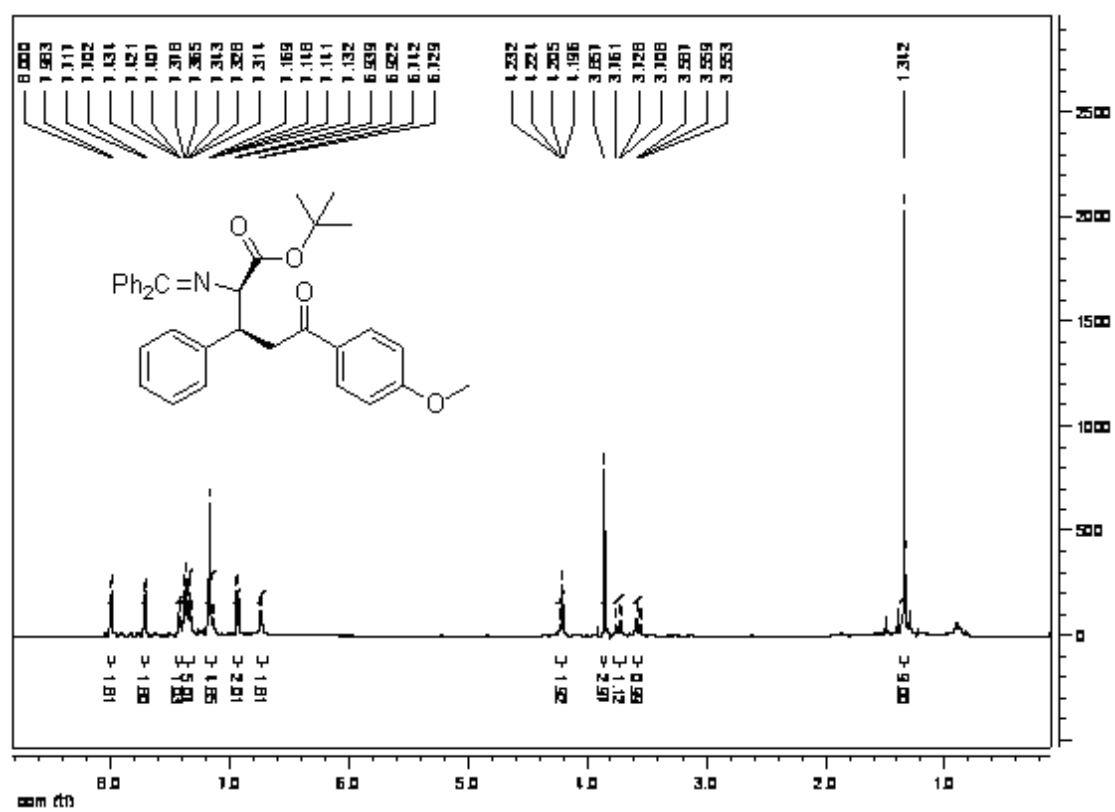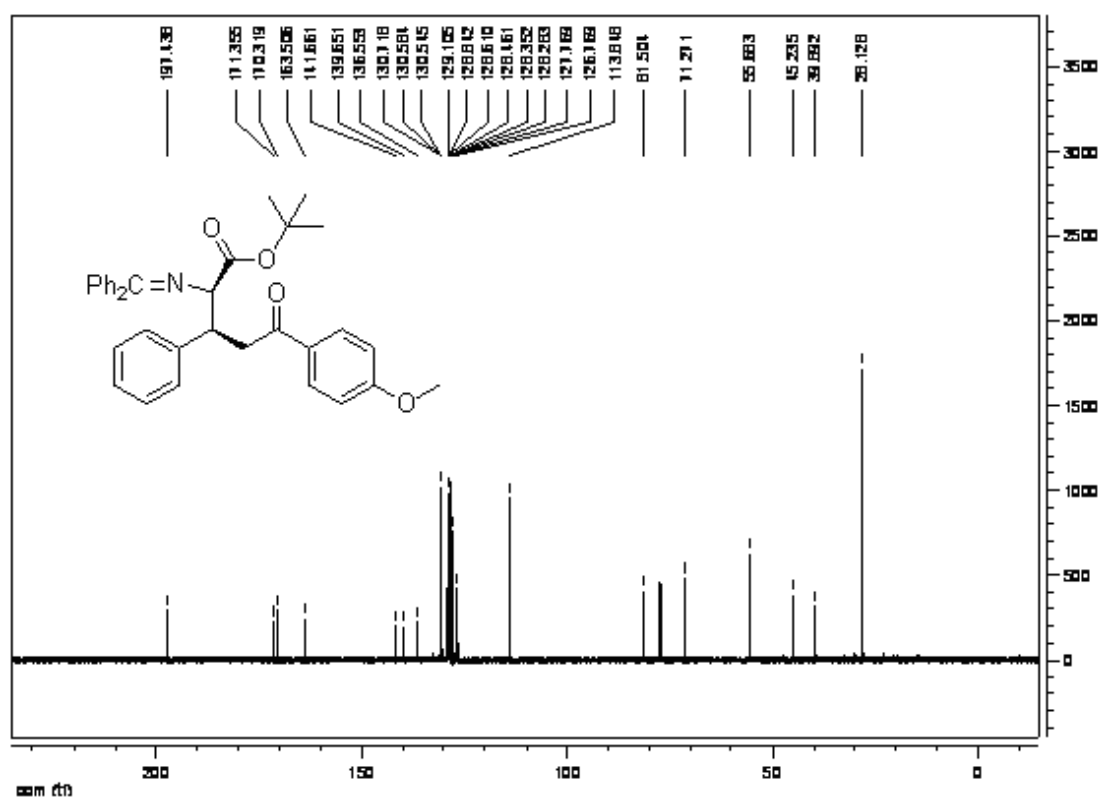





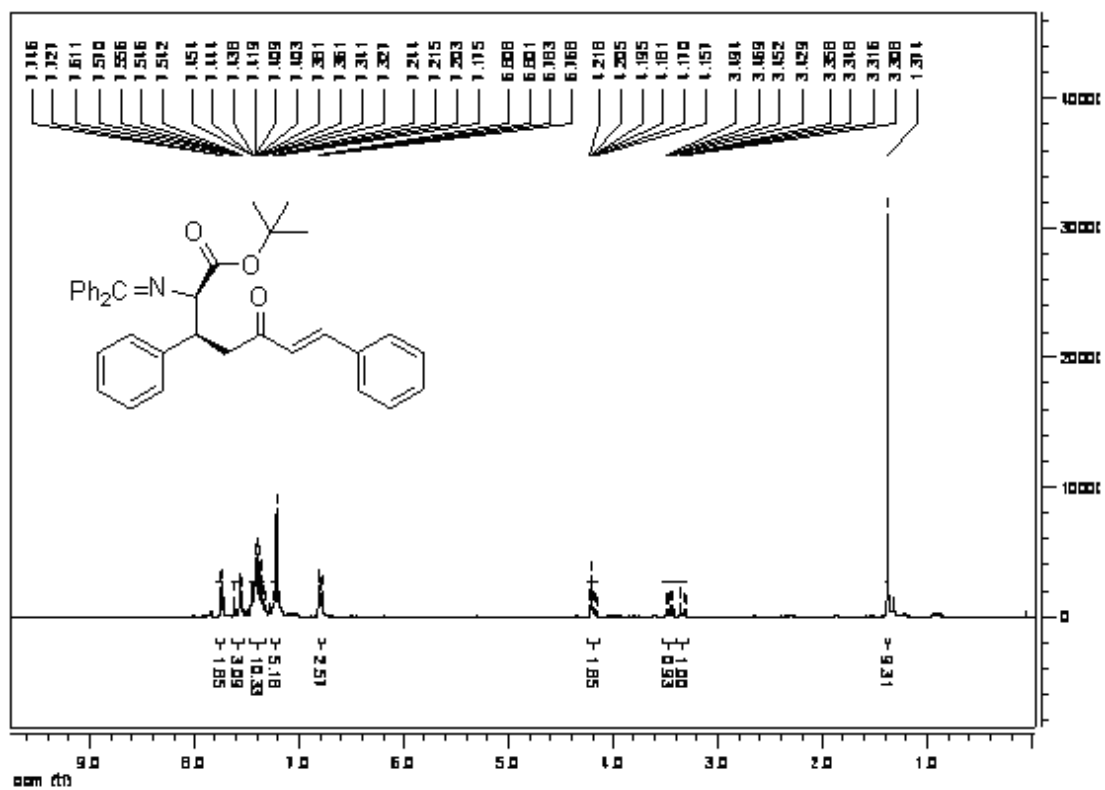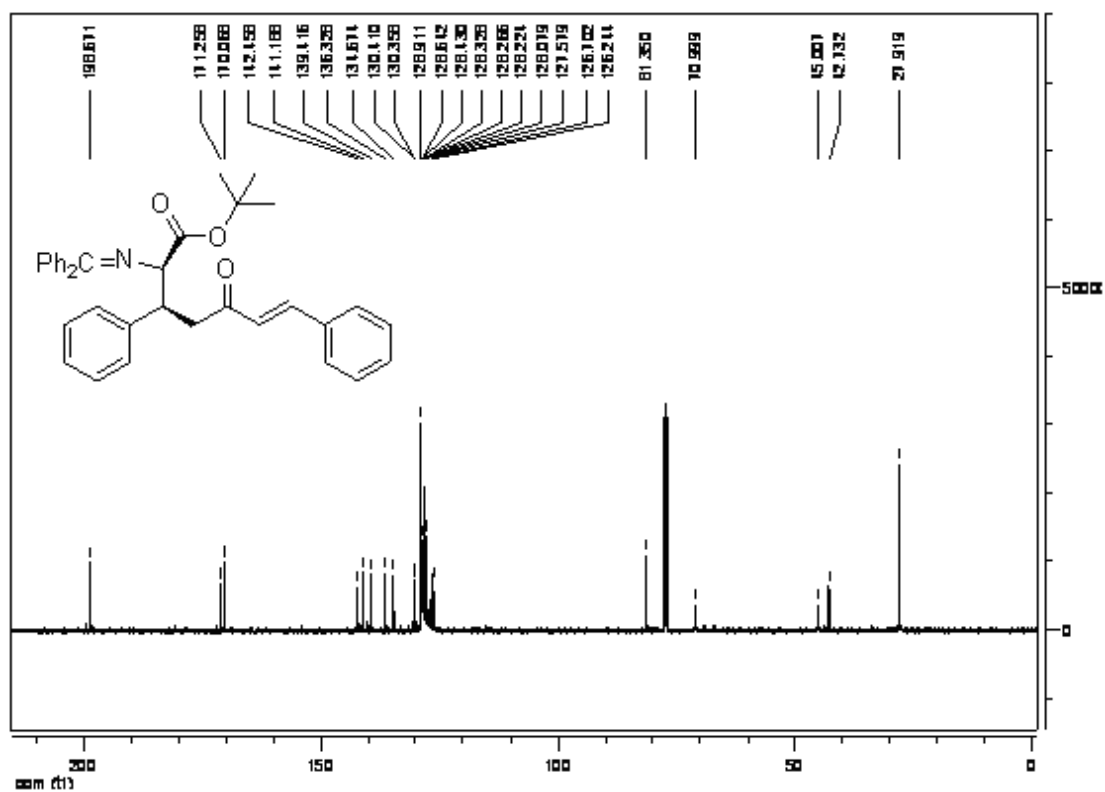



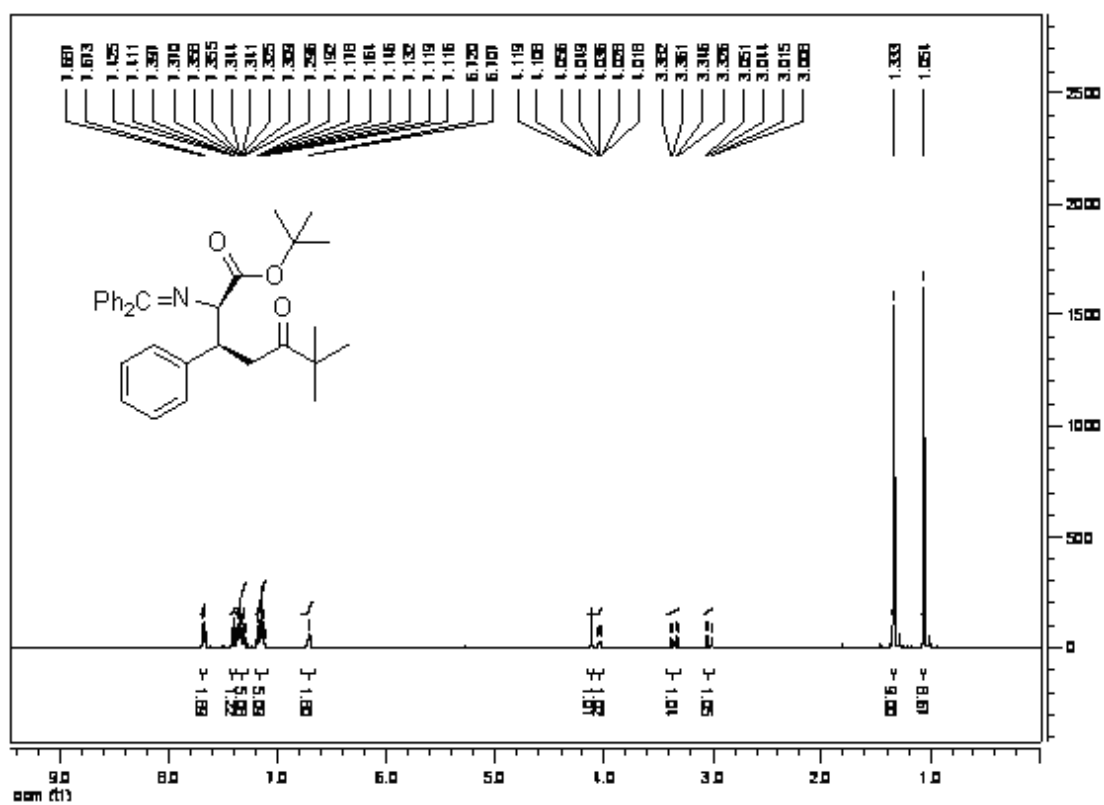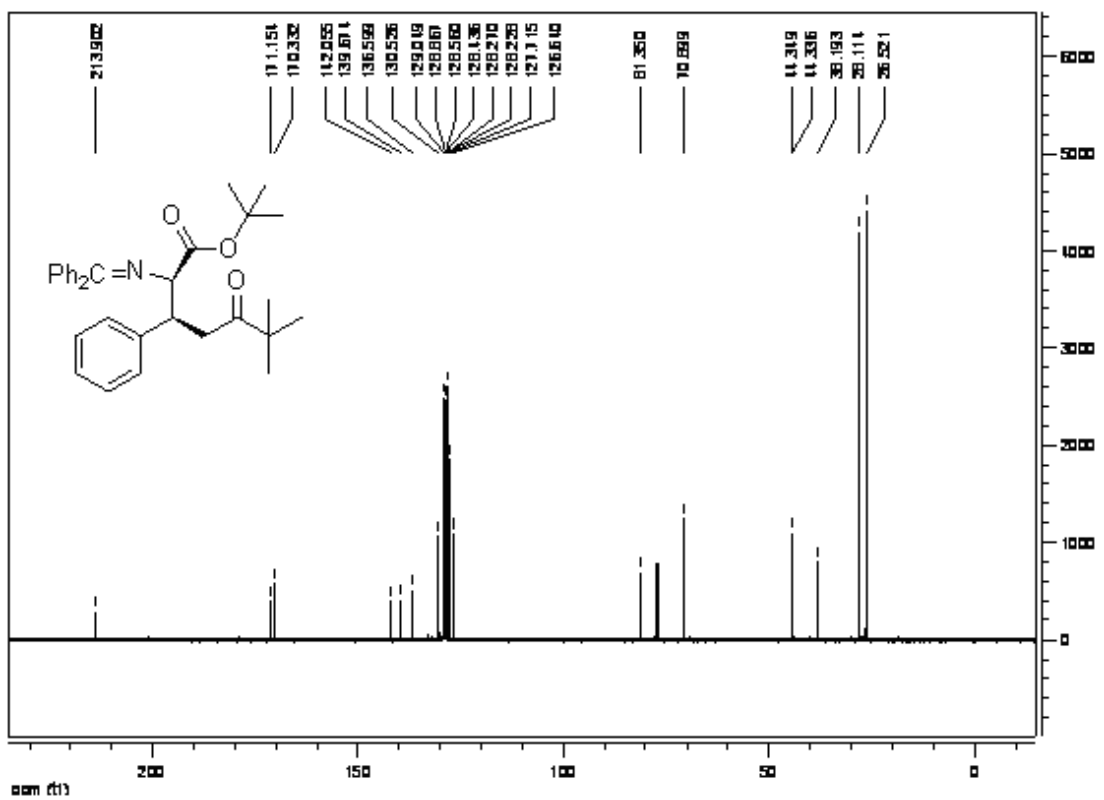



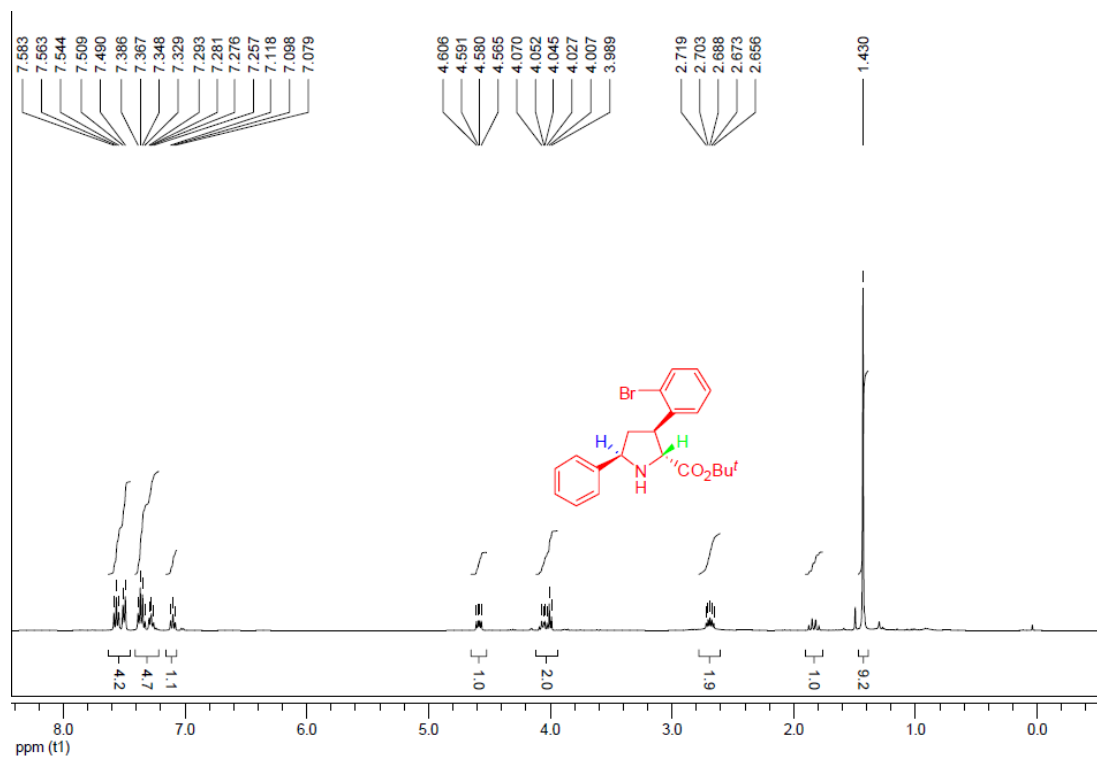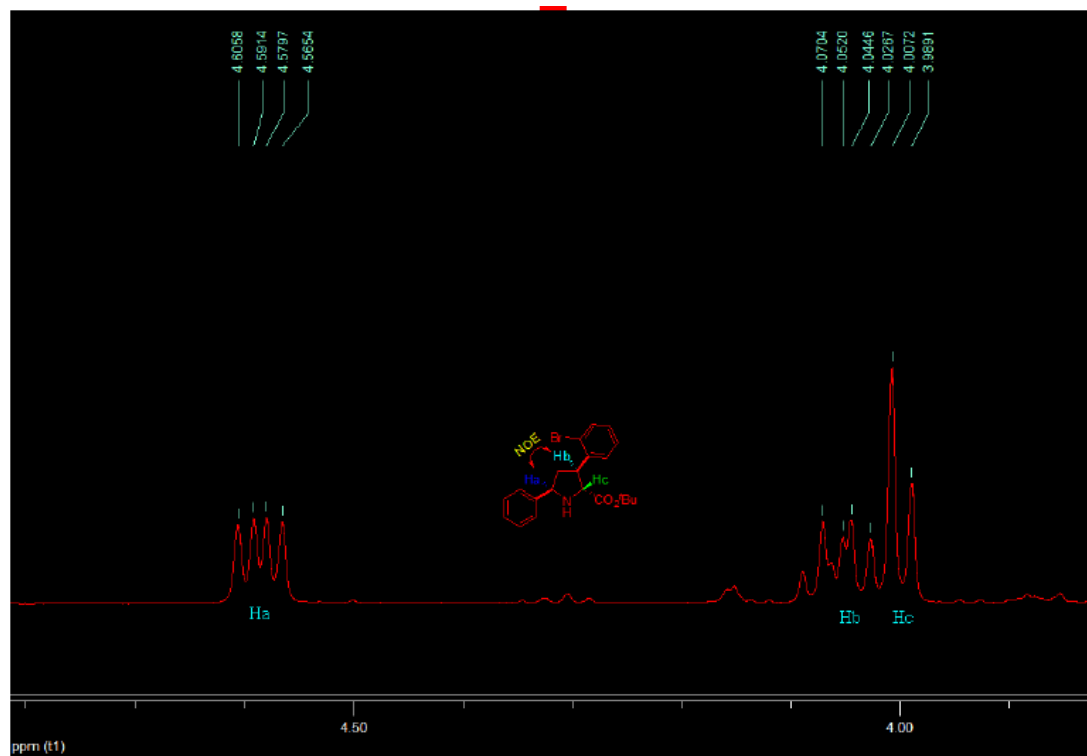

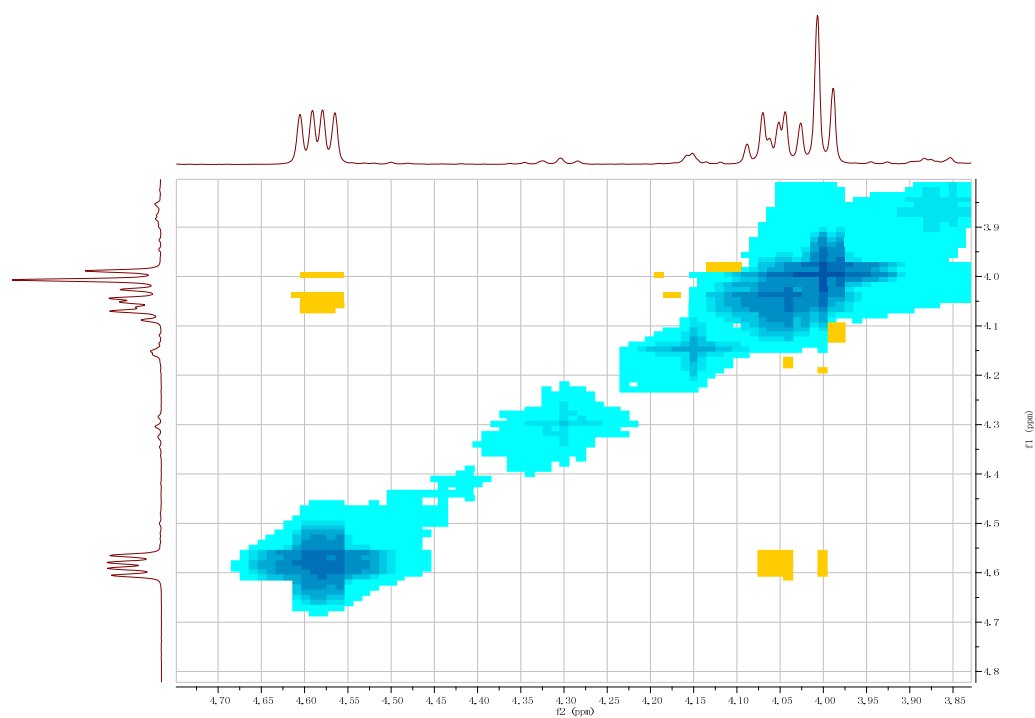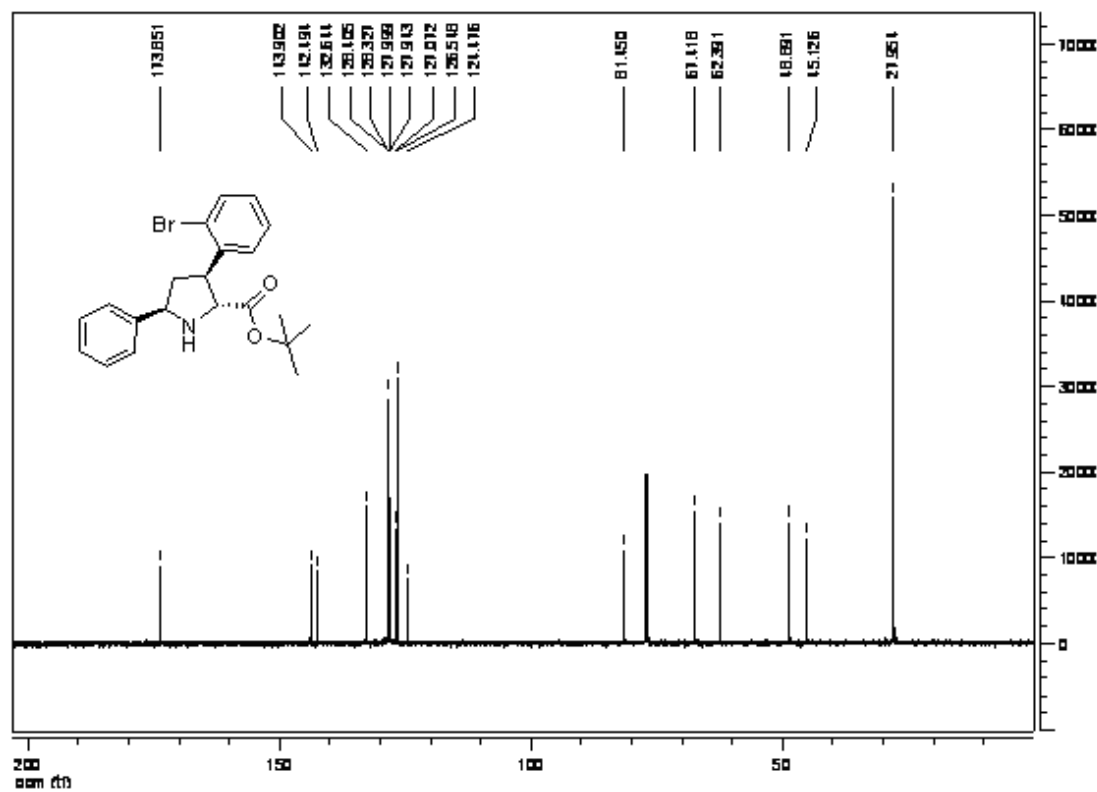

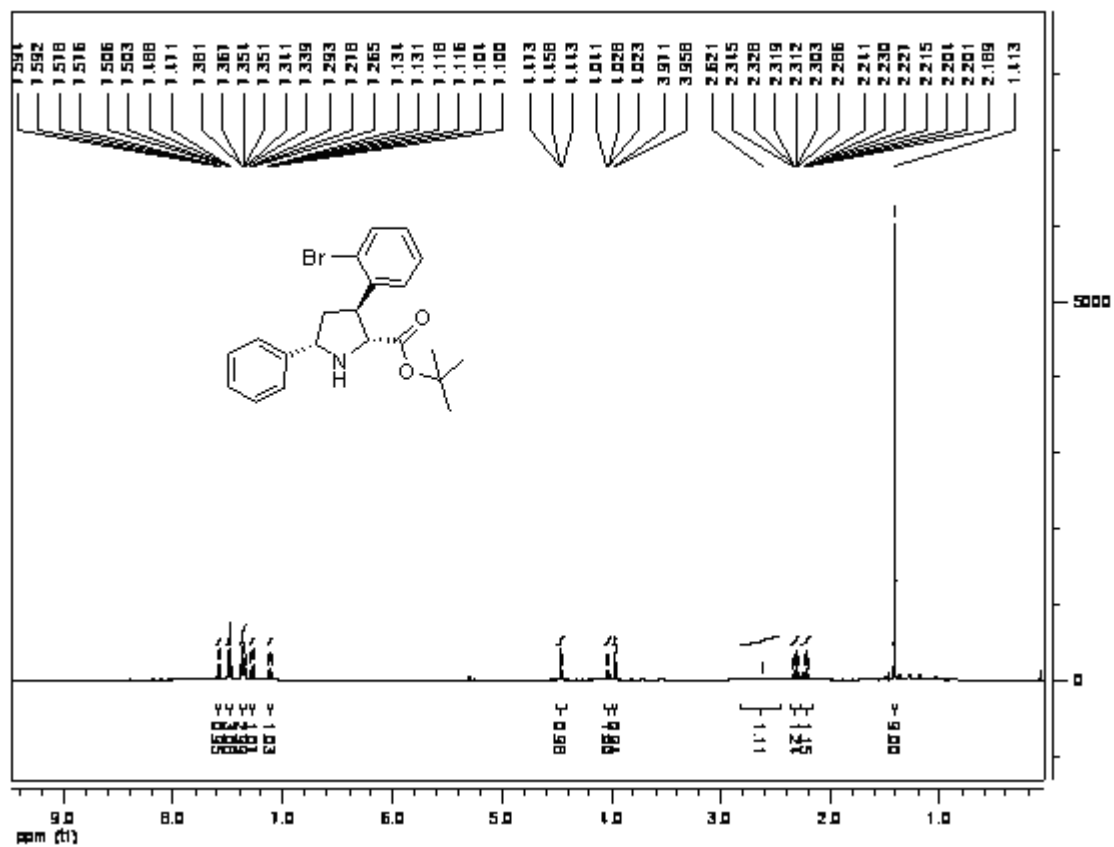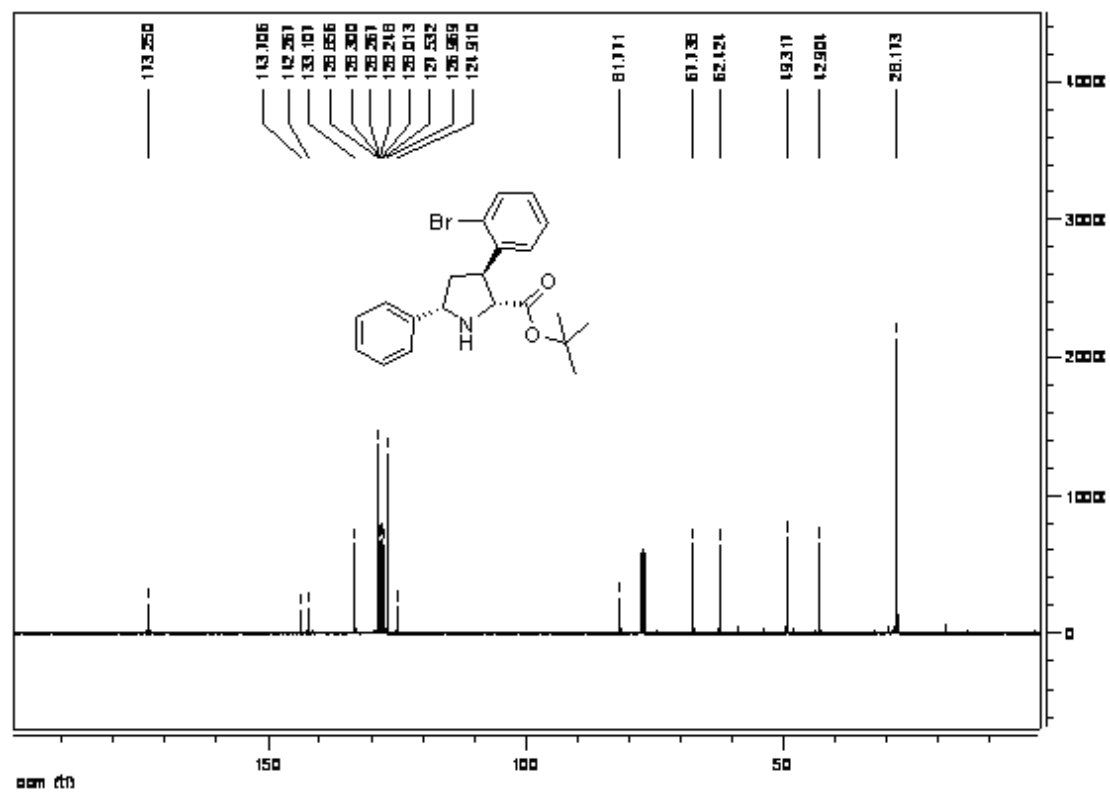





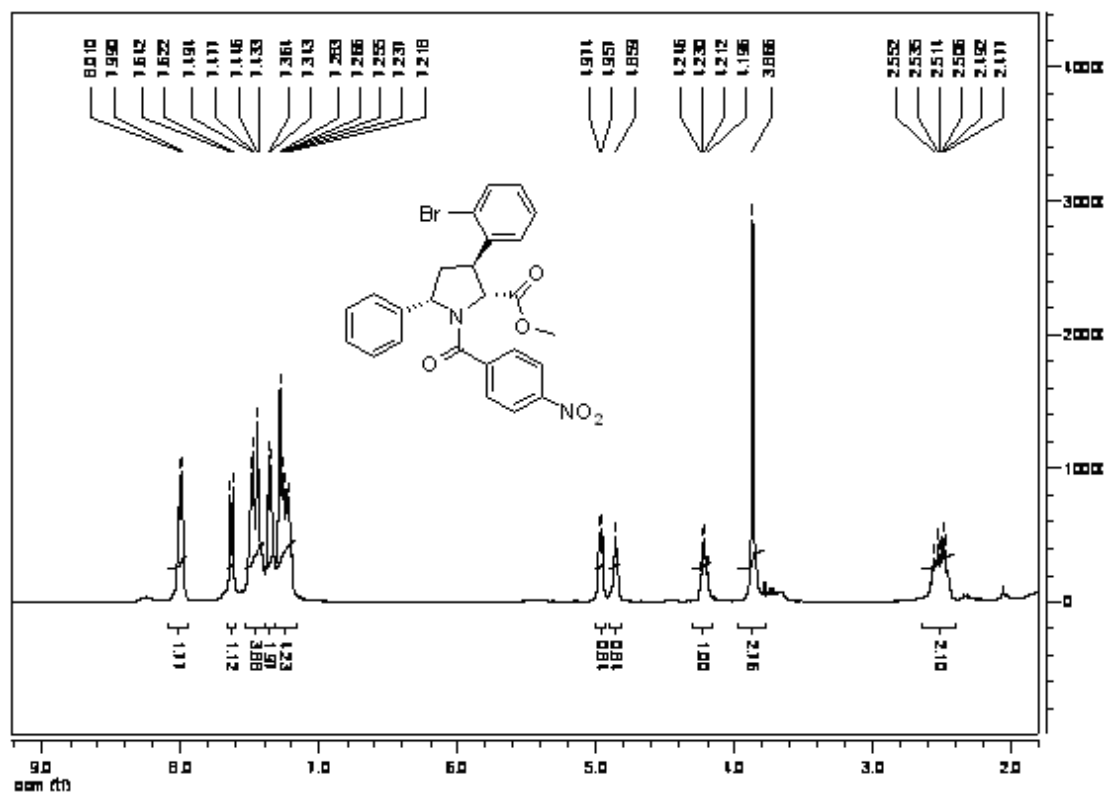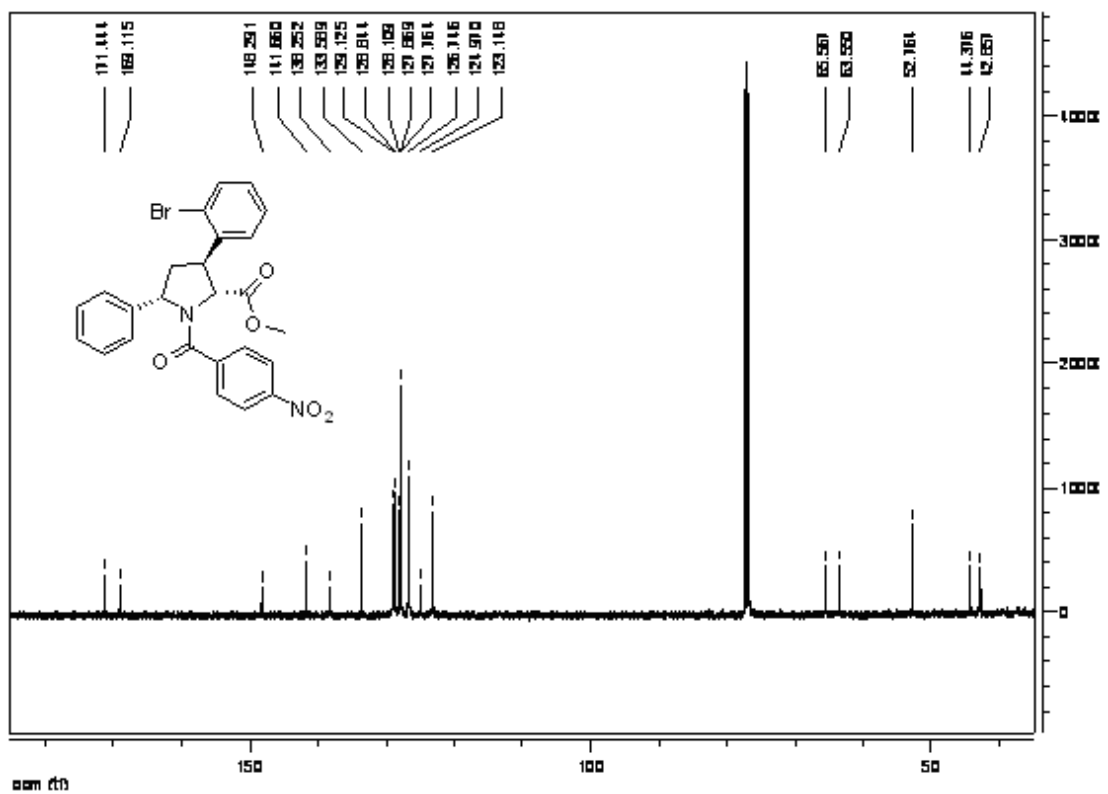



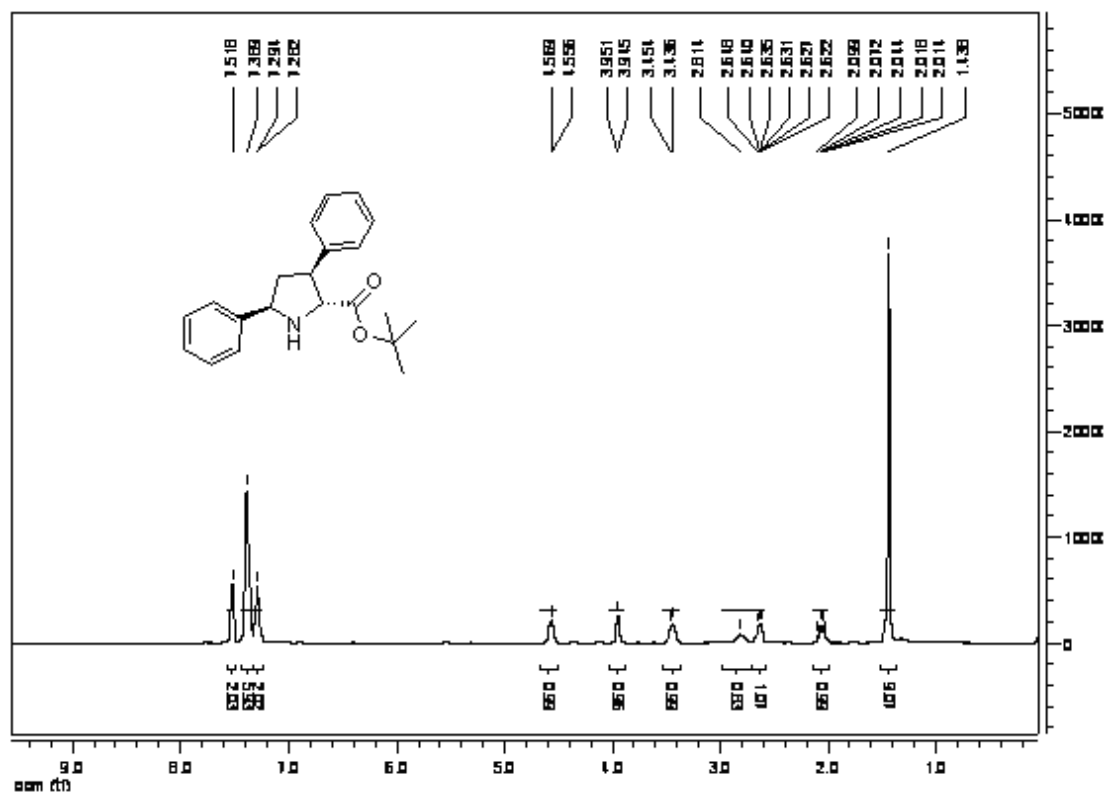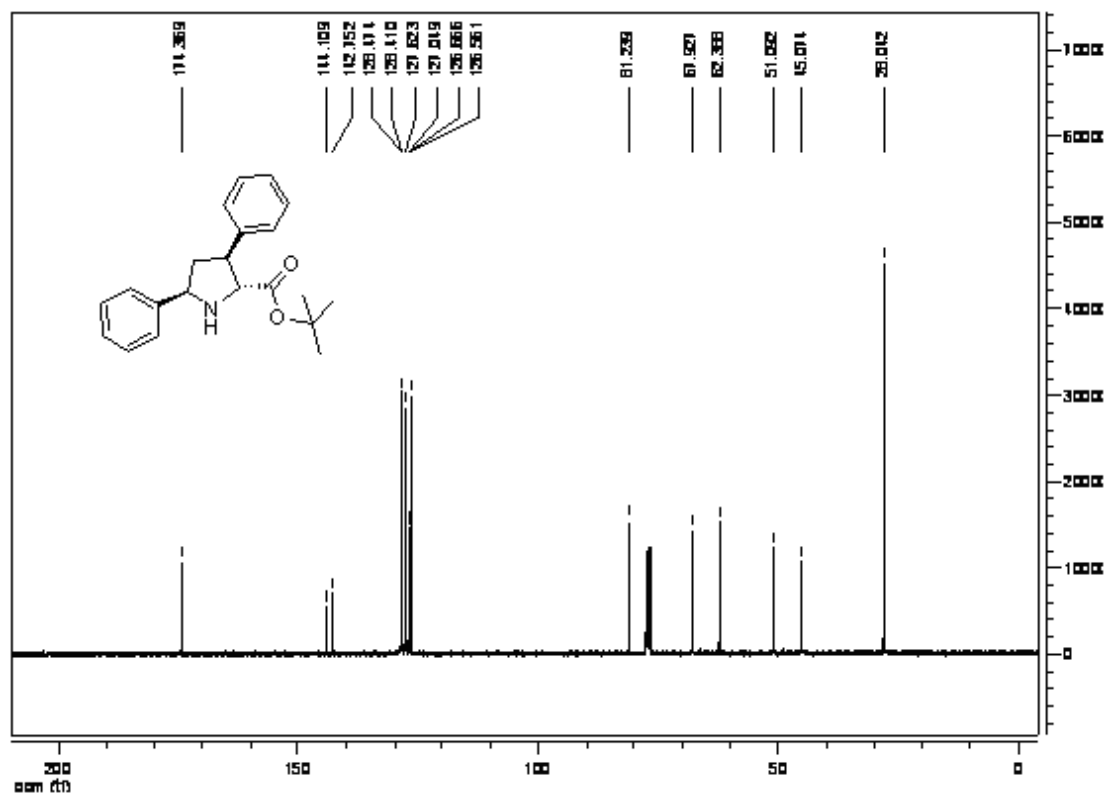

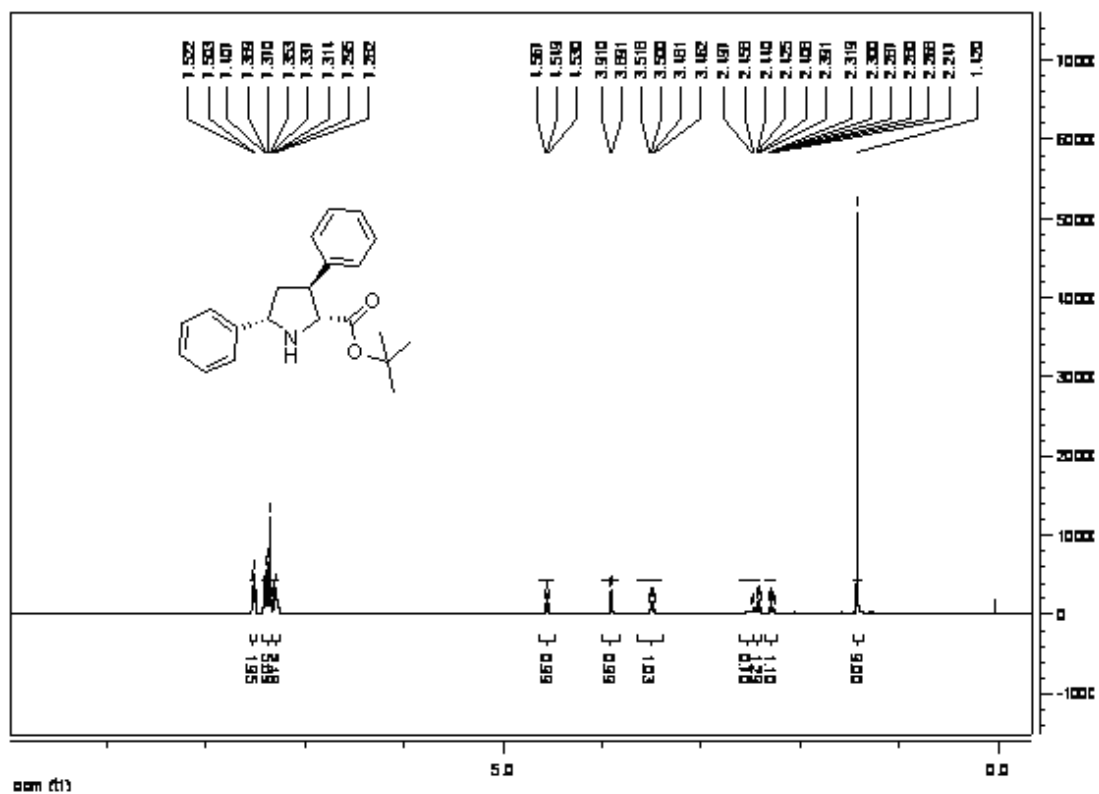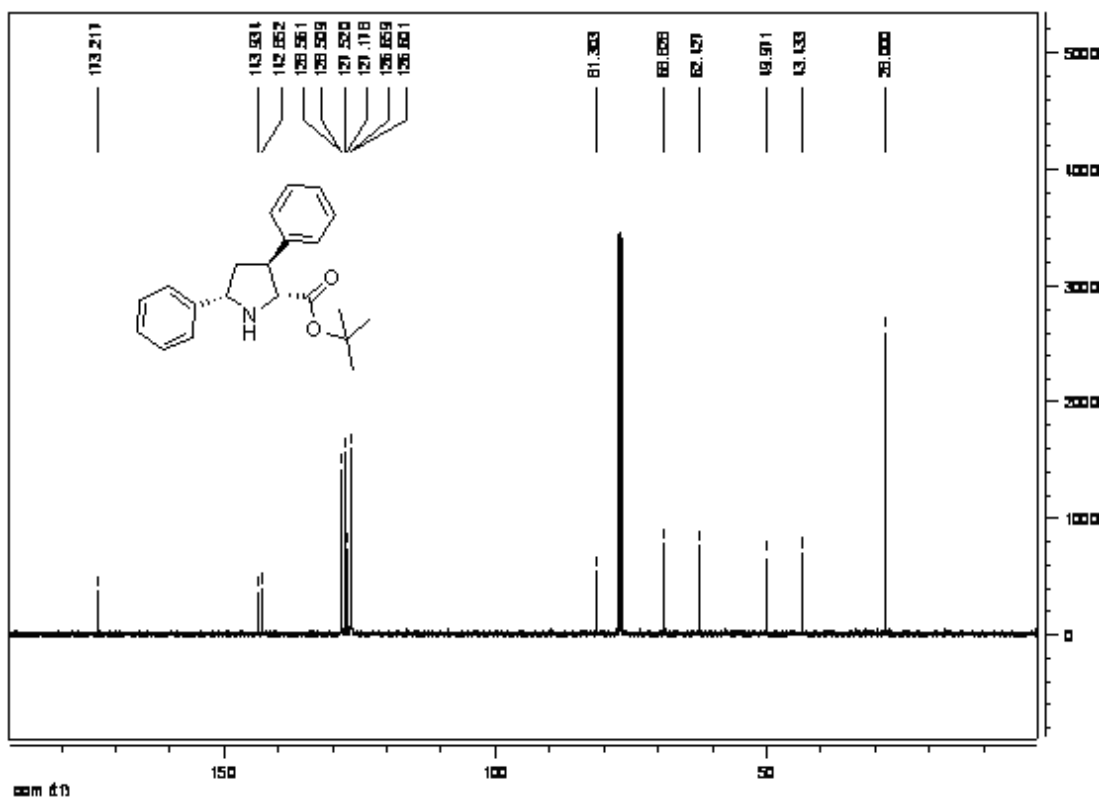

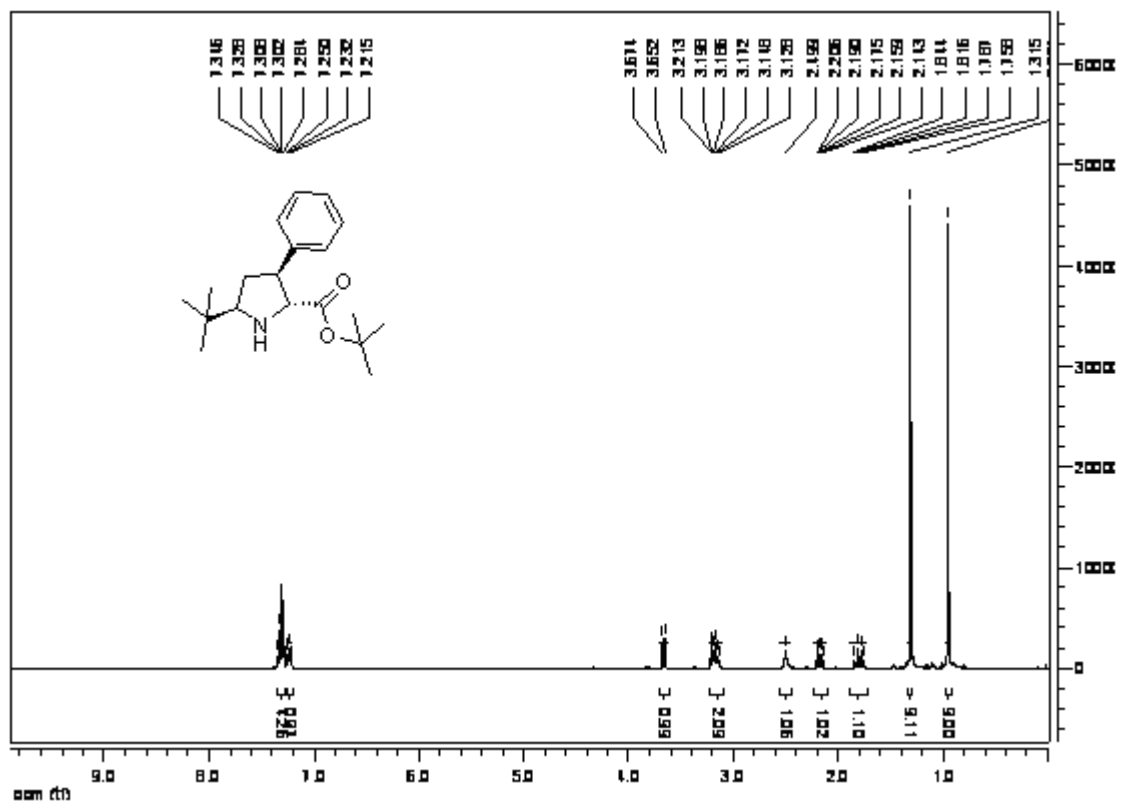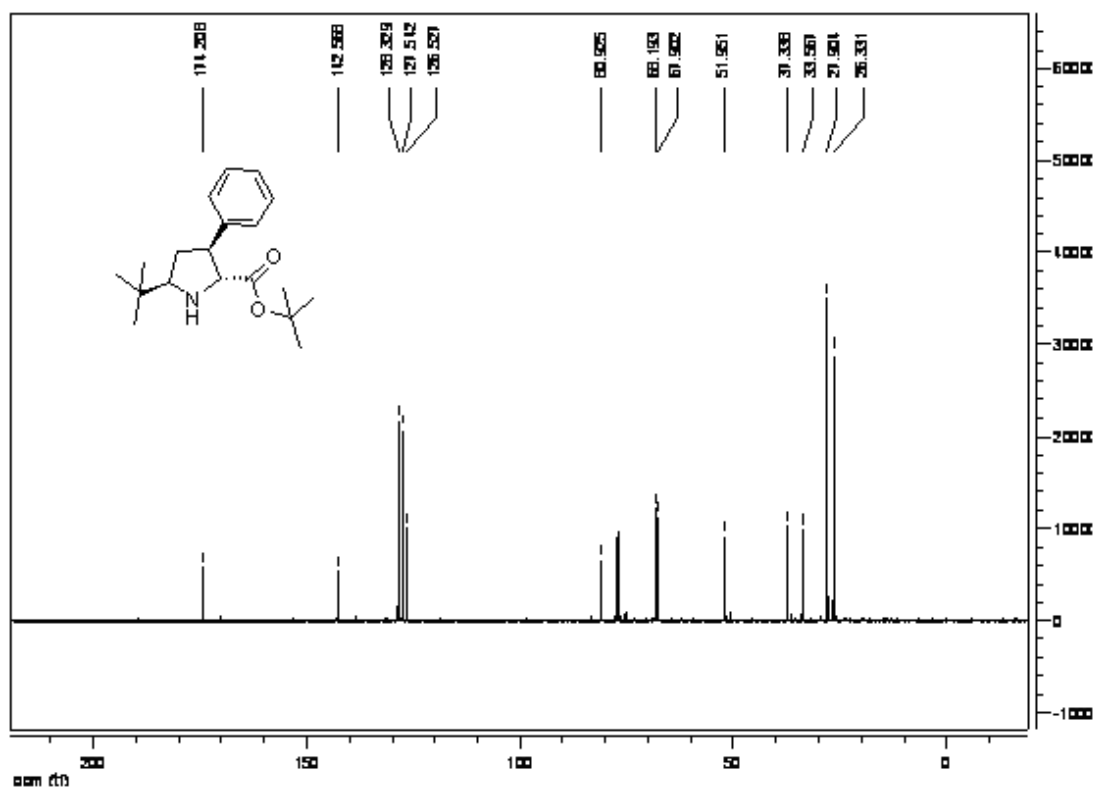

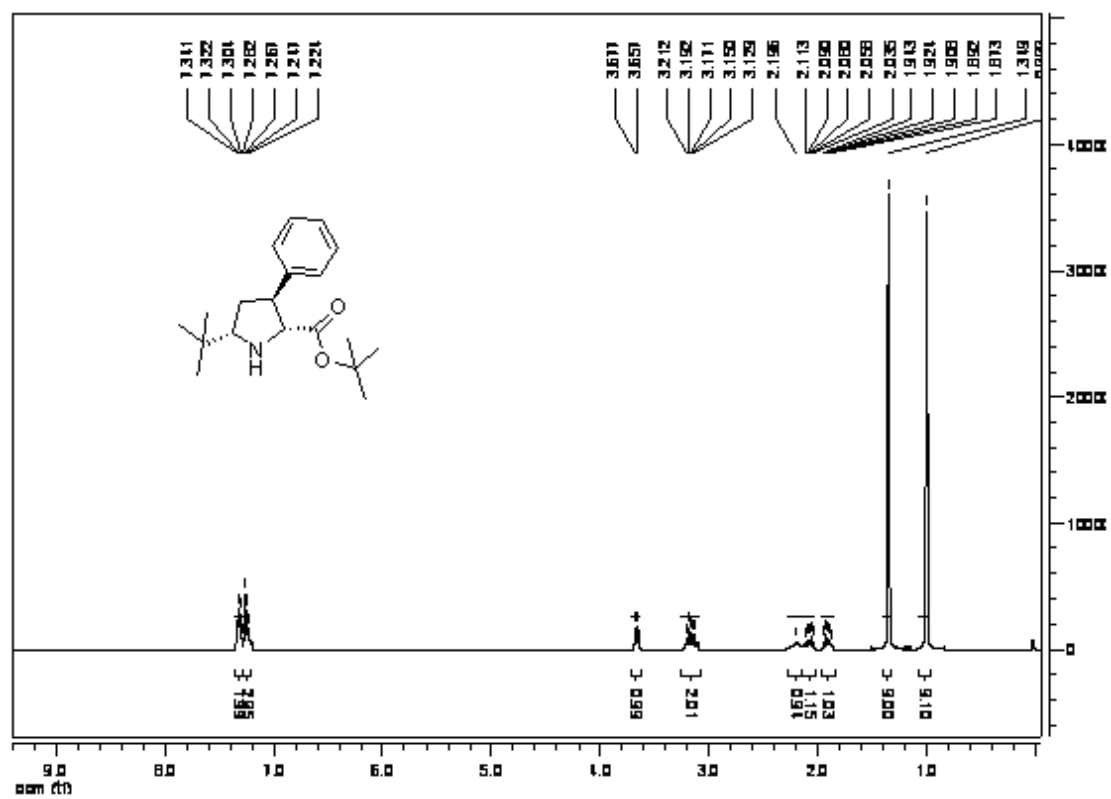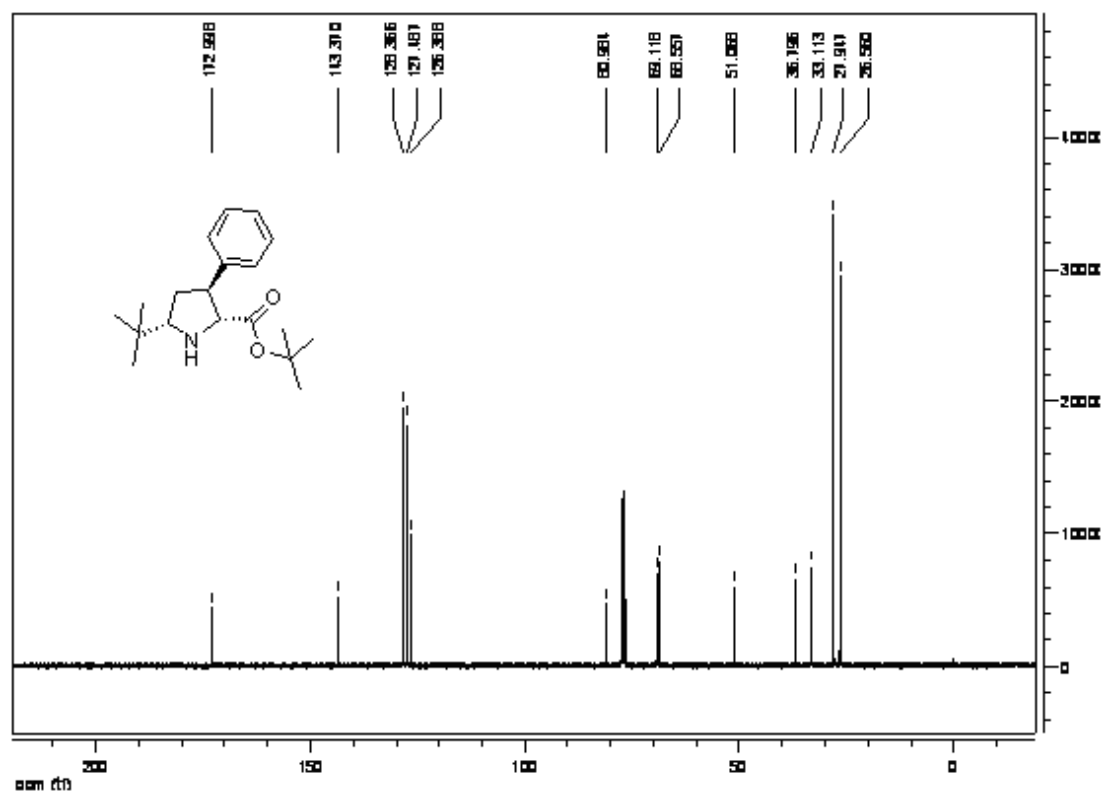





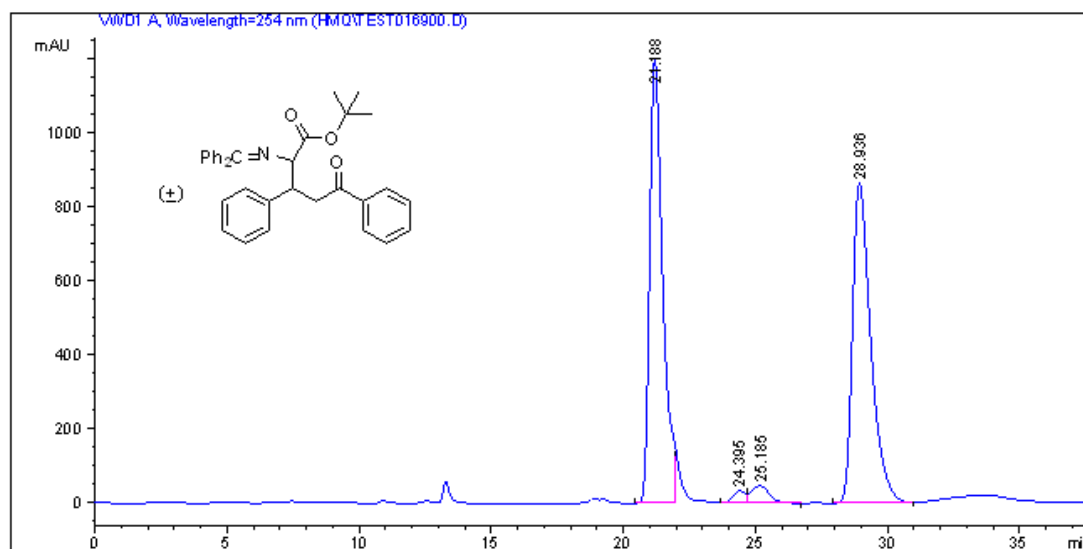

Signal 1: VWD1 A, Wavelength=254 nm

| Peak # | RetTime [min] | Type | Width [min] | Area mAU *s | Height [mAU] | Area %  |
|--------|---------------|------|-------------|-------------|--------------|---------|
| 1      | 21.188        | BBA  | 0.5196      | 4.13869e4   | 1197.79419   | 48.1231 |
| 2      | 24.395        | VV   | 0.4825      | 1043.23901  | 32.98769     | 1.2130  |
| 3      | 25.185        | VB   | 0.7334      | 2229.09375  | 46.31133     | 2.5919  |
| 4      | 28.936        | VV   | 0.7218      | 4.13429e4   | 863.34637    | 48.0720 |

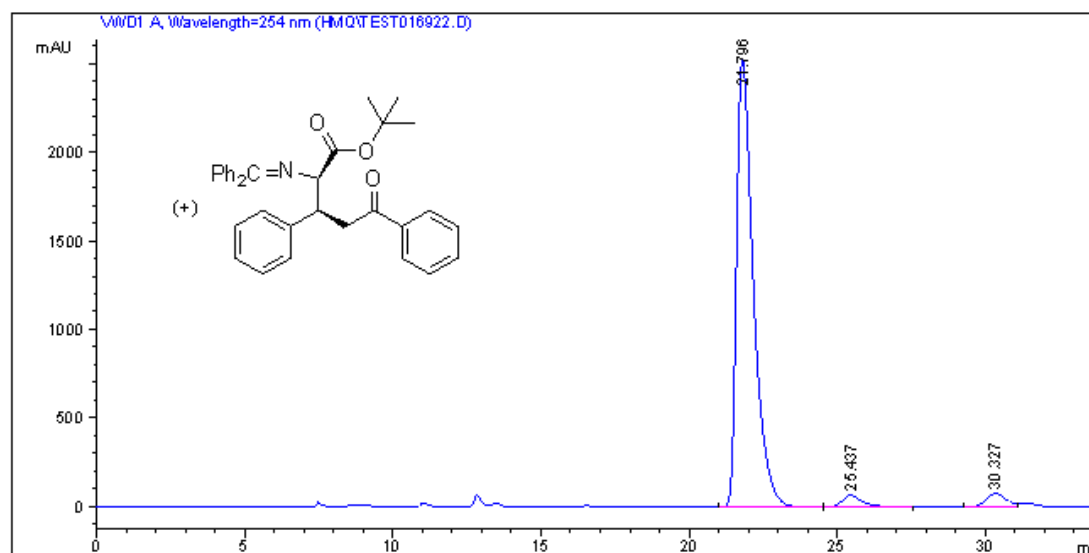

Signal 1: VWD1 A, wavelength=254 nm

| Peak # | RetTime [min] | Type | Width [min] | Area mAU *s | Height [mAU] | Area %  |
|--------|---------------|------|-------------|-------------|--------------|---------|
| 1      | 21.796        | BV   | 0.5936      | 9.92737e4   | 2519.88696   | 93.7906 |
| 2      | 25.437        | VB   | 0.6777      | 2973.49316  | 65.55968     | 2.8093  |
| 3      | 30.327        | BV   | 0.7285      | 3598.88306  | 75.42698     | 3.4001  |

Totals : 1.05846e5 2660.87363

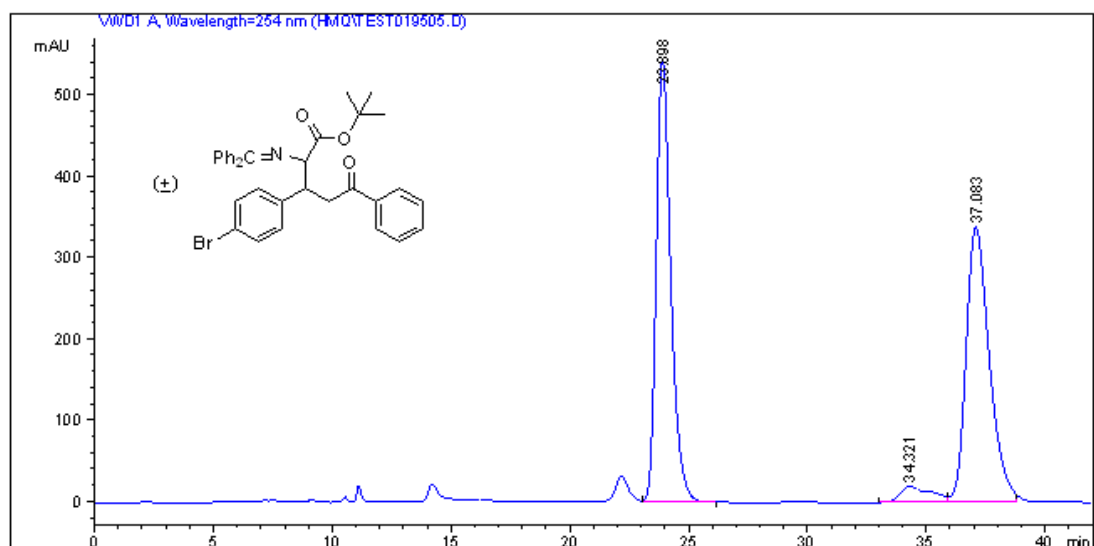

Signal 1: VWD1 A, Wavelength=254 nm

| Peak # | RetTime [min] | Type | Width [min] | Area mAU *s | Height [mAU] | Area %  |
|--------|---------------|------|-------------|-------------|--------------|---------|
| 1      | 23.898        | BB   | 0.6467      | 2.30223e4   | 542.28558    | 48.0725 |
| 2      | 34.321        | BV   | 1.2760      | 1815.20227  | 19.69900     | 3.7903  |
| 3      | 37.083        | VBA  | 1.0398      | 2.30533e4   | 338.23761    | 48.1372 |

Totals : 4.78908e4 900.22219

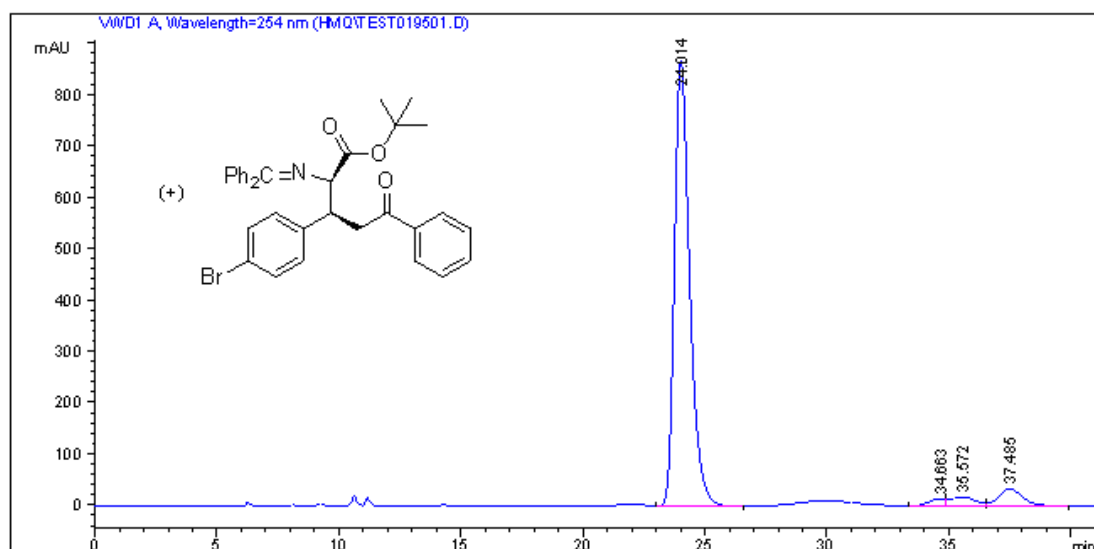

Signal 1: VWD1 A, Wavelength=254 nm

| Peak # | RetTime [min] | Type | Width [min] | Area mAU *s | Height [mAU] | Area %  |
|--------|---------------|------|-------------|-------------|--------------|---------|
| 1      | 24.014        | VB   | 0.6596      | 3.75097e4   | 866.06055    | 89.8518 |
| 2      | 34.663        | VV   | 0.7449      | 648.54541   | 13.47726     | 1.5535  |
| 3      | 35.572        | VV   | 1.0498      | 1263.17358  | 17.72588     | 3.0258  |
| 4      | 37.485        | VB   | 1.0310      | 2324.74316  | 34.10902     | 5.5688  |

Totals : 4.17461e4 931.37271

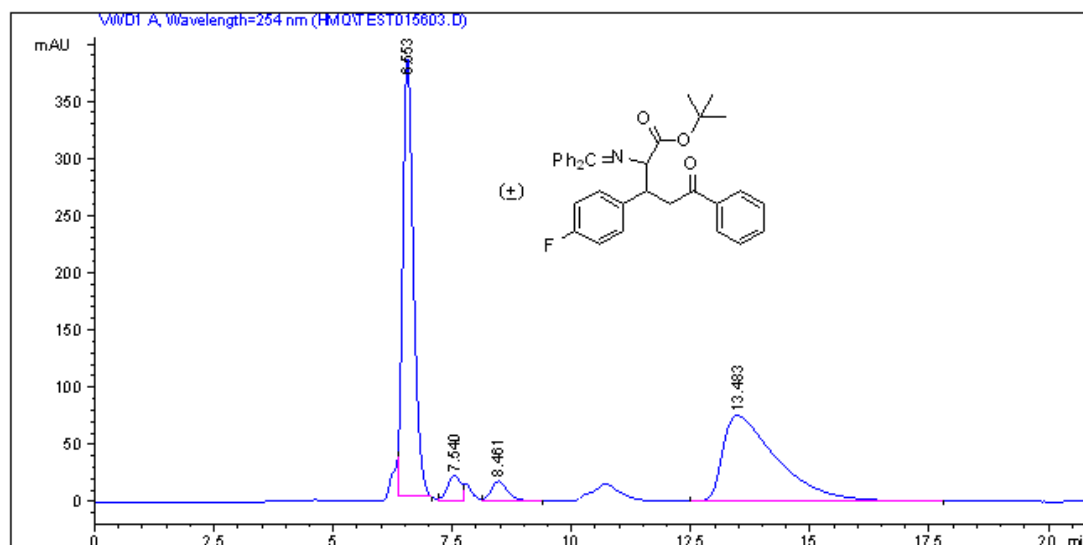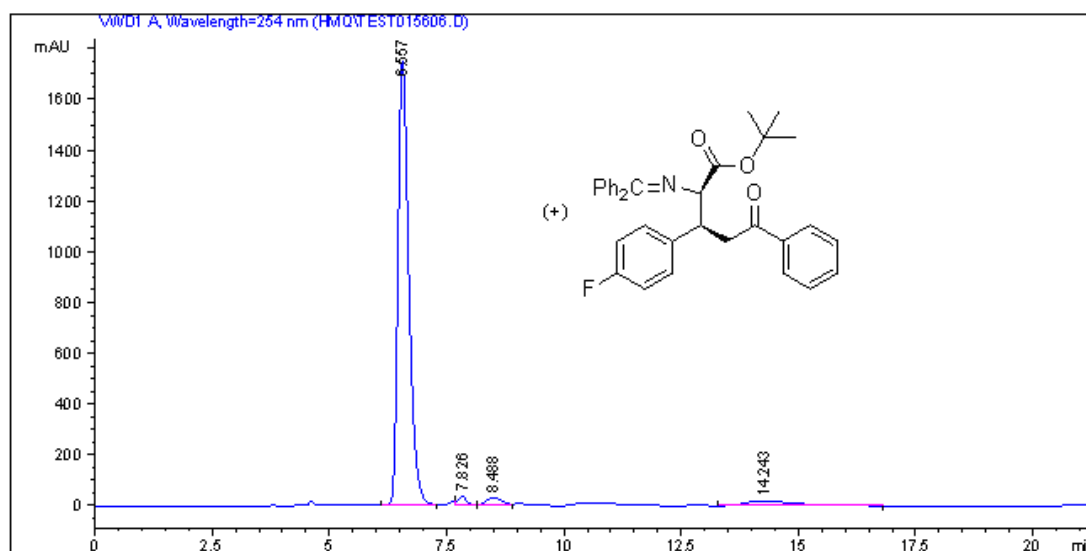

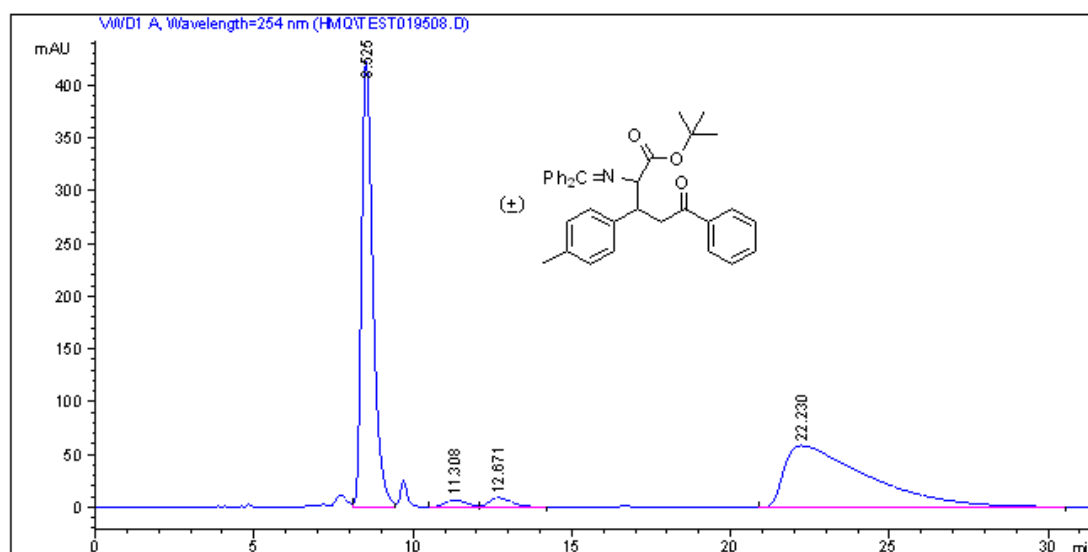

Signal 1: VWD1 A, Wavelength=254 nm

| Peak # | RetTime [min] | Type | Width [min] | Area mAU  | Height [mAU] | Area %  |
|--------|---------------|------|-------------|-----------|--------------|---------|
| 1      | 8.525         | VBA  | 0.3820      | 1.05452e4 | 421.70993    | 48.1343 |
| 2      | 11.308        | BV   | 0.7038      | 298.97260 | 6.52066      | 1.3647  |
| 3      | 12.671        | VB   | 0.7780      | 423.57214 | 8.78541      | 1.9334  |
| 4      | 22.230        | BB   | 2.5668      | 1.06401e4 | 58.35965     | 48.5676 |

Totals : 2.19078e4 495.37565

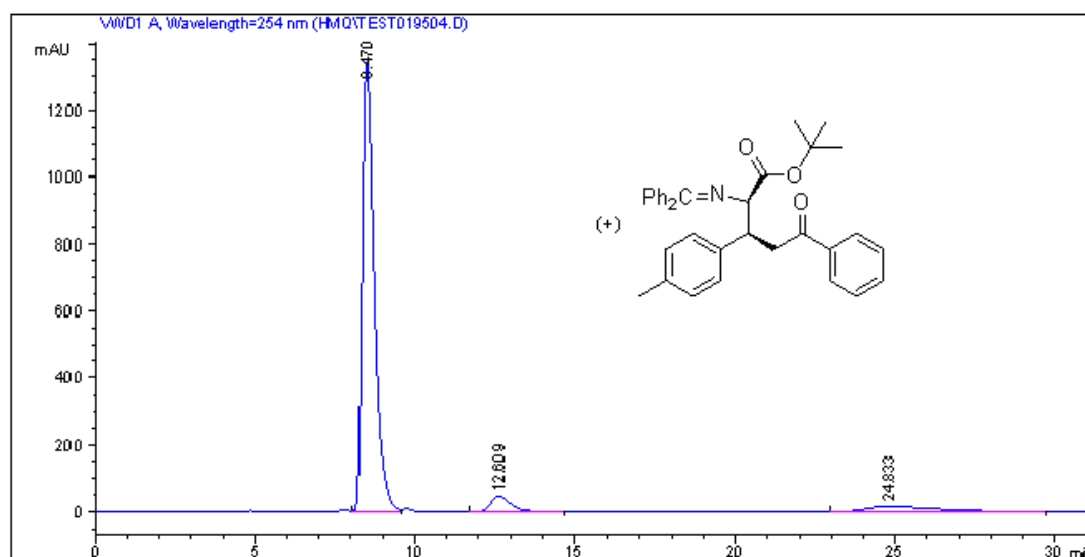

Signal 1: VWD1 A, Wavelength=254 nm

| Peak # | RetTime [min] | Type | Width [min] | Area mAU   | Height [mAU] | Area %  |
|--------|---------------|------|-------------|------------|--------------|---------|
| 1      | 8.470         | VV   | 0.3883      | 3.42749e4  | 1341.93127   | 88.8417 |
| 2      | 12.609        | VB   | 0.6261      | 1952.19739 | 46.83176     | 5.0602  |
| 3      | 24.833        | BB   | 2.0579      | 2352.63818 | 15.53568     | 6.0981  |

Totals : 3.85797e4 1404.29871

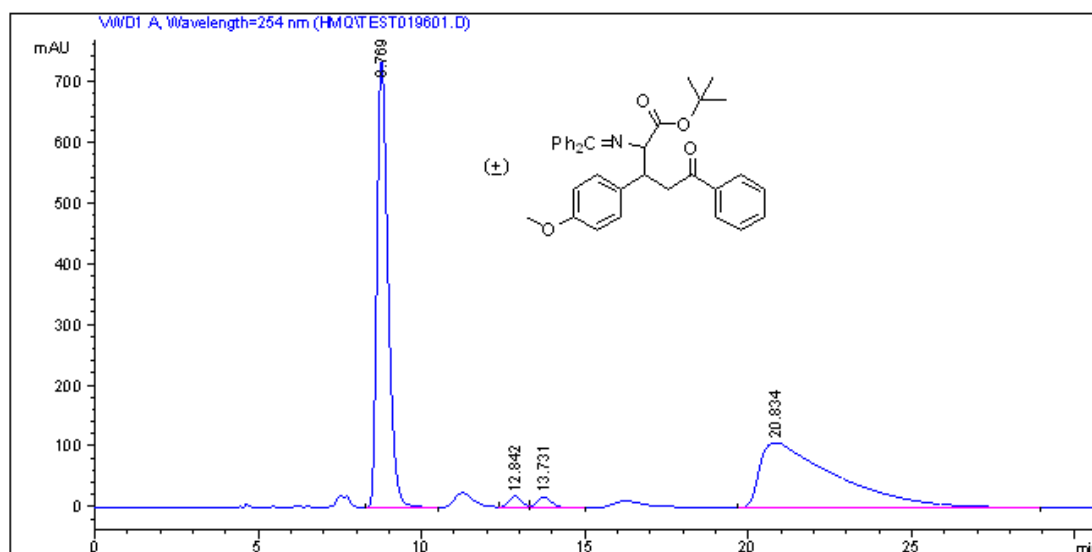

Signal 1: WWD1 A, Wavelength=254 nm

| Peak # | RetTime [min] | Type | Width [min] | Area mAU *s | Height [mAU] | Area %  |
|--------|---------------|------|-------------|-------------|--------------|---------|
| 1      | 8.769         | VBA  | 0.3620      | 1.72750e4   | 733.94446    | 48.7011 |
| 2      | 12.842        | BV   | 0.4186      | 485.11447   | 18.04025     | 1.3676  |
| 3      | 13.731        | VB   | 0.4551      | 515.12958   | 17.44913     | 1.4522  |
| 4      | 20.834        | BB   | 2.1772      | 1.71963e4   | 107.03320    | 48.4791 |

Totals : 3.54716e4 876.46704

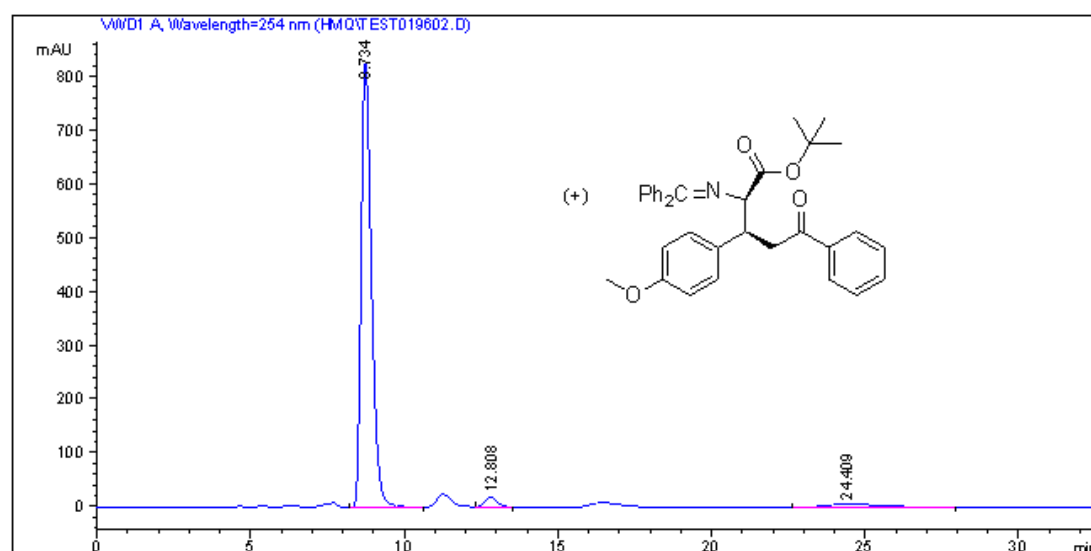

Signal 1: WWD1 A, Wavelength=254 nm

| Peak # | RetTime [min] | Type | Width [min] | Area mAU *s | Height [mAU] | Area %  |
|--------|---------------|------|-------------|-------------|--------------|---------|
| 1      | 8.734         | VV   | 0.3601      | 1.93212e4   | 826.34949    | 93.6836 |
| 2      | 12.808        | BV   | 0.4236      | 532.43567   | 19.31321     | 2.5817  |
| 3      | 24.409        | BB   | 1.7000      | 770.23920   | 6.24946      | 3.7347  |

Totals : 2.06238e4 851.91216

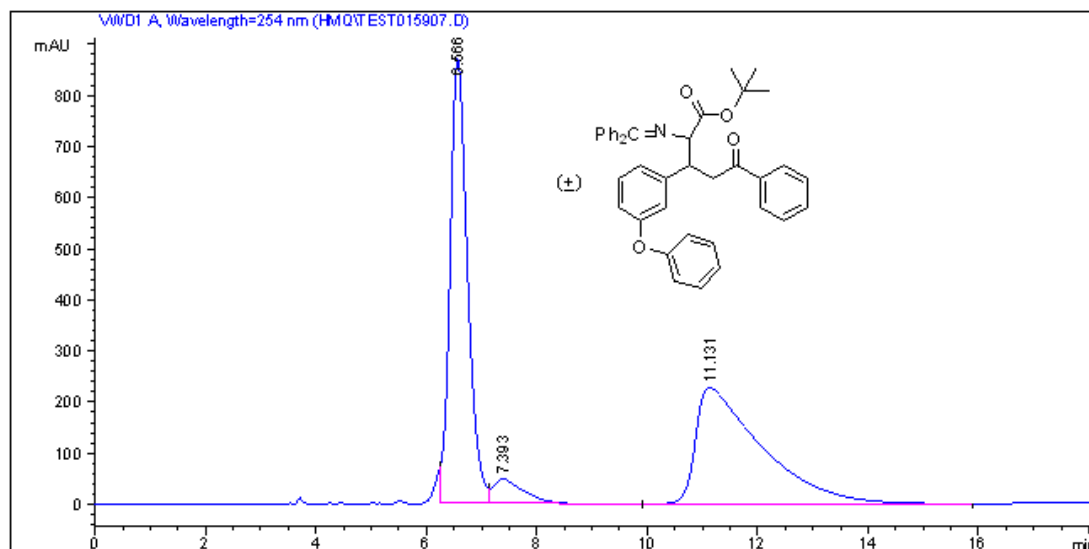

Signal 1: VWD1 A, Wavelength=254 nm

| Peak # | RetTime [min] | Type | Width [min] | Area mAU *s | Height [mAU] | Area %  |
|--------|---------------|------|-------------|-------------|--------------|---------|
| 1      | 6.566         | BV   | 0.3327      | 1.91276e4   | 868.19684    | 48.1063 |
| 2      | 7.393         | VV   | 0.5013      | 1743.82324  | 48.13354     | 4.3858  |
| 3      | 11.131        | VB   | 1.1520      | 1.88896e4   | 227.54025    | 47.5079 |

Totals : 3.97610e4 1143.87063

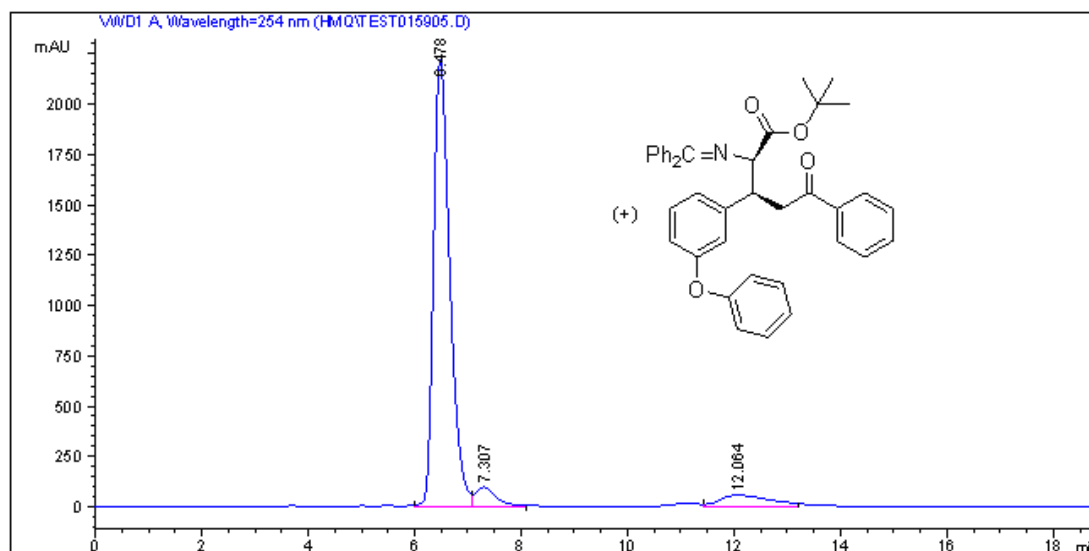

Signal 1: VWD1 A, Wavelength=254 nm

| Peak # | RetTime [min] | Type | Width [min] | Area mAU *s | Height [mAU] | Area %  |
|--------|---------------|------|-------------|-------------|--------------|---------|
| 1      | 6.478         | VV   | 0.3278      | 4.73691e4   | 2218.13989   | 88.0218 |
| 2      | 7.307         | VV   | 0.3953      | 2630.88989  | 96.92289     | 4.8888  |
| 3      | 12.064        | VBA  | 1.0022      | 3815.16650  | 56.99771     | 7.0894  |

Totals : 5.38151e4 2372.06049

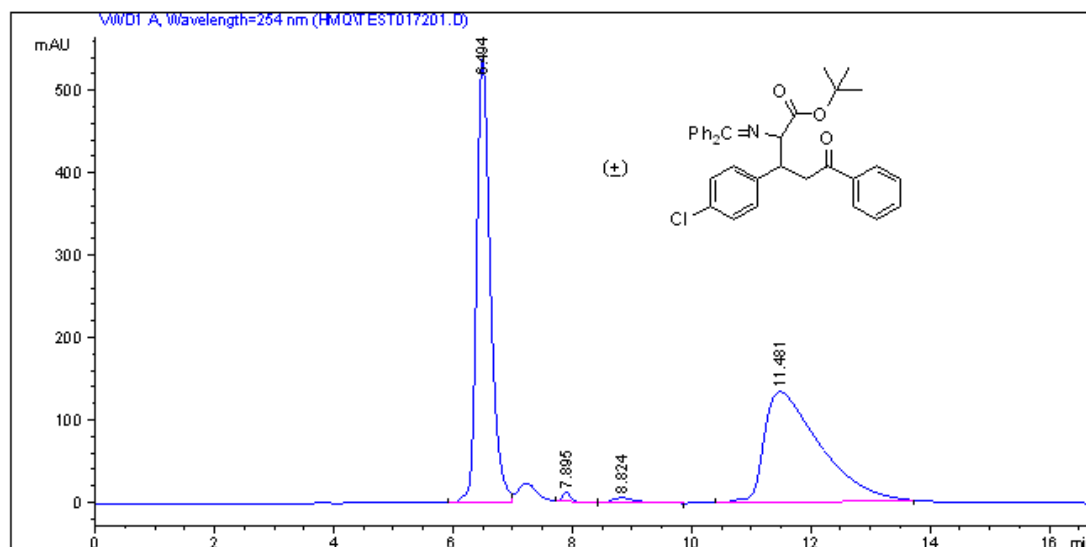

Signal 1: VWD1 A, Wavelength=254 nm

| Peak # | RetTime [min] | Type | Width [min] | Area mAU *s | Height [mAU] | Area %  |
|--------|---------------|------|-------------|-------------|--------------|---------|
| 1      | 6.494         | VBA  | 0.2469      | 8719.17187  | 539.16956    | 49.1664 |
| 2      | 7.895         | BV   | 0.1430      | 96.75677    | 10.73397     | 0.5456  |
| 3      | 8.824         | VV   | 0.4089      | 164.02328   | 6.11796      | 0.9249  |
| 4      | 11.481        | VBA  | 0.9691      | 8754.05566  | 133.96846    | 49.3631 |

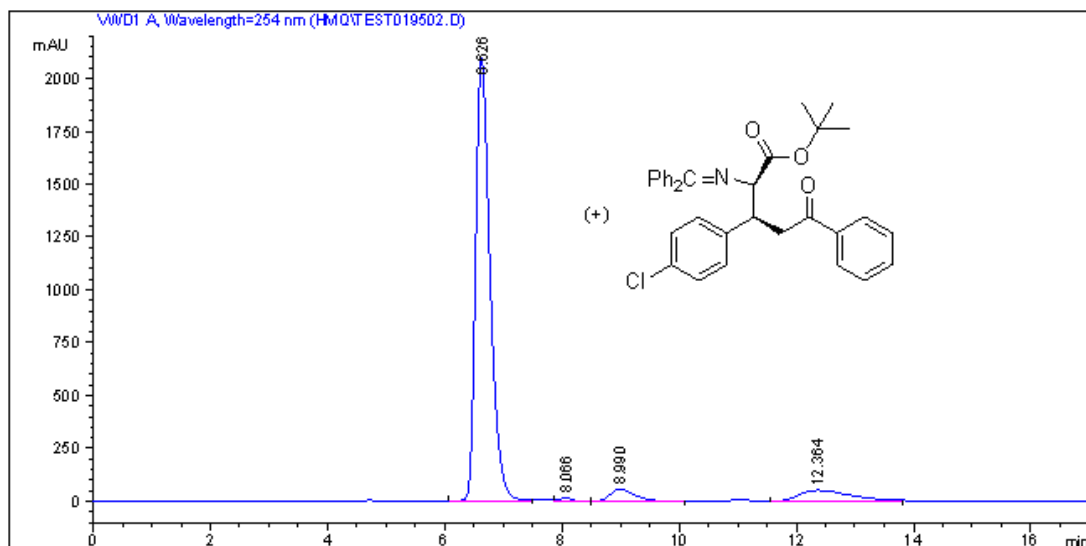

Signal 1: VWD1 A, Wavelength=254 nm

| Peak # | RetTime [min] | Type | Width [min] | Area mAU *s | Height [mAU] | Area %  |
|--------|---------------|------|-------------|-------------|--------------|---------|
| 1      | 6.626         | VV   | 0.2647      | 3.60430e4   | 2095.97388   | 87.2983 |
| 2      | 8.066         | VV   | 0.2118      | 254.91852   | 17.10040     | 0.6174  |
| 3      | 8.990         | VV   | 0.4372      | 1708.31287  | 57.93135     | 4.1376  |
| 4      | 12.364        | VBA  | 0.9541      | 3280.92261  | 52.02935     | 7.9466  |

Totals : 4.12872e4 2223.03498

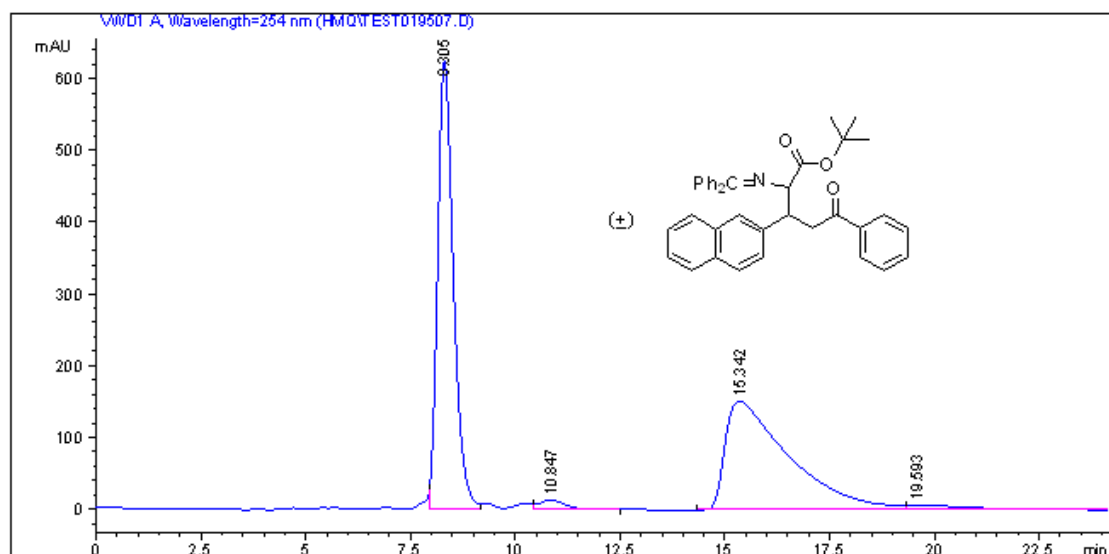

Signal 1: VWD1 A, Wavelength=254 nm

| Peak # | RetTime [min] | Type | Width [min] | Area mAU  | Area *s   | Height [mAU] | Area % |
|--------|---------------|------|-------------|-----------|-----------|--------------|--------|
| 1      | 8.305         | BV   | 0.3954      | 1.63647e4 | 625.63080 | 48.5634      |        |
| 2      | 10.847        | VV   | 0.6613      | 613.48279 | 13.64758  | 1.8206       |        |
| 3      | 15.342        | BB   | 1.4905      | 1.60691e4 | 151.54115 | 47.6865      |        |
| 4      | 19.593        | BBA  | 1.2685      | 650.20966 | 6.22297   | 1.9295       |        |

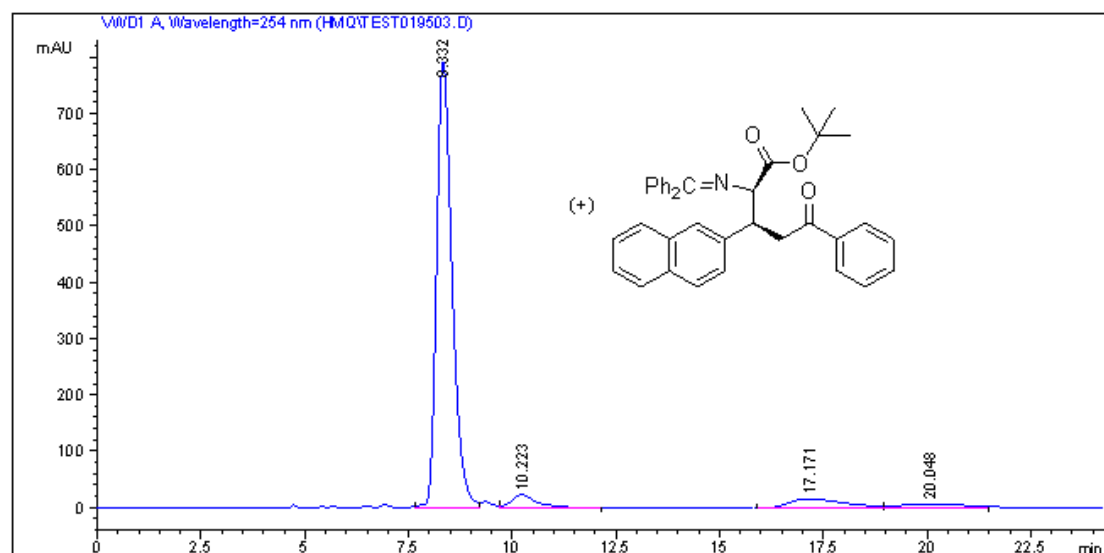

Signal 1: VWD1 A, Wavelength=254 nm

| Peak # | RetTime [min] | Type | Width [min] | Area mAU   | Area *s   | Height [mAU] | Area % |
|--------|---------------|------|-------------|------------|-----------|--------------|--------|
| 1      | 8.332         | VV   | 0.3964      | 2.06254e4  | 793.71204 | 86.3170      |        |
| 2      | 10.223        | VB   | 0.6420      | 1013.81250 | 23.14939  | 4.2428       |        |
| 3      | 17.171        | VV   | 1.3751      | 1477.55444 | 16.20851  | 6.1836       |        |
| 4      | 20.048        | VBA  | 1.4717      | 778.17010  | 7.34610   | 3.2566       |        |

Totals : 2.38949e4 840.41604



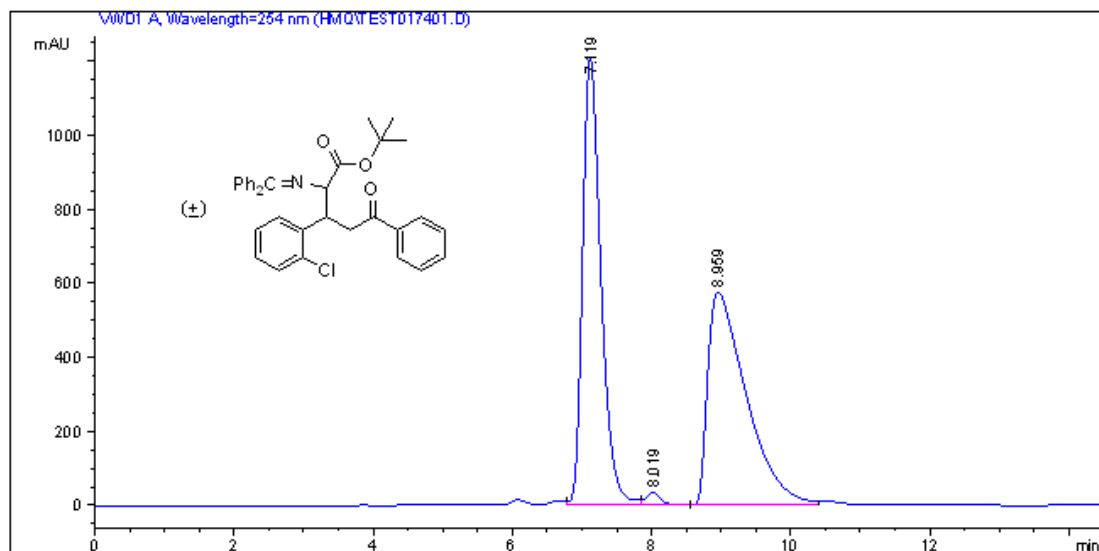

Signal 1: VWD1 A, Wavelength=254 nm

| Peak # | RetTime [min] | Type | Width [min] | Area mAU *s | Height [mAU] | Area %  |
|--------|---------------|------|-------------|-------------|--------------|---------|
| 1      | 7.119         | VV   | 0.2814      | 2.22049e4   | 1208.13550   | 49.2917 |
| 2      | 8.019         | VV   | 0.2138      | 552.38226   | 36.63074     | 1.2262  |
| 3      | 8.959         | VV   | 0.5961      | 2.22907e4   | 577.23853    | 49.4821 |

Totals : 4.50480e4 1822.00476

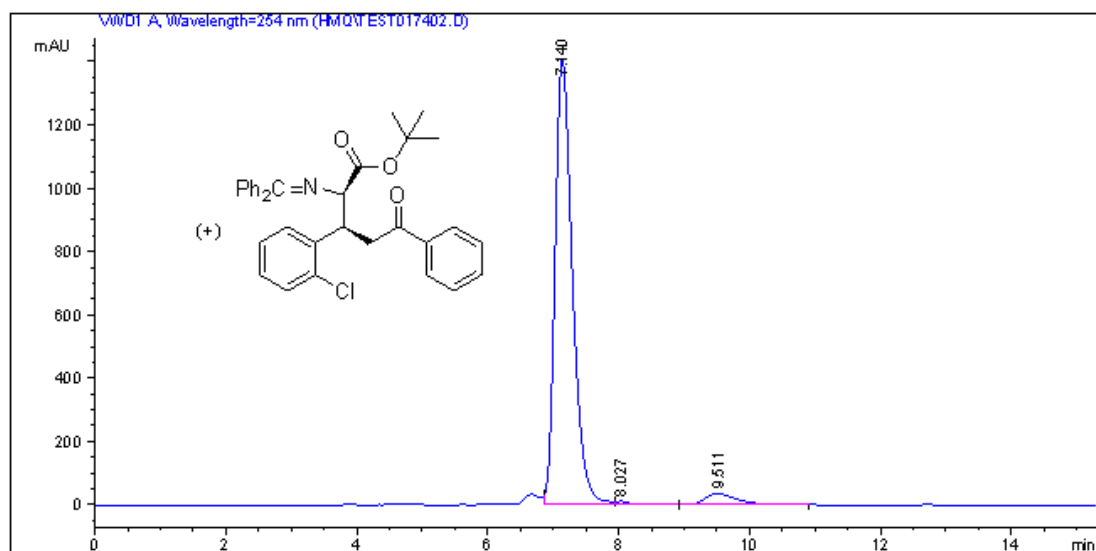

Signal 1: VWD1 A, Wavelength=254 nm

| Peak # | RetTime [min] | Type | Width [min] | Area mAU *s | Height [mAU] | Area %  |
|--------|---------------|------|-------------|-------------|--------------|---------|
| 1      | 7.140         | EV   | 0.2822      | 2.59031e4   | 1404.33374   | 94.9596 |
| 2      | 8.027         | VV   | 0.2111      | 162.79120   | 10.96045     | 0.5968  |
| 3      | 9.511         | VBA  | 0.5279      | 1212.12842  | 34.86501     | 4.4436  |

Totals : 2.72780e4 1450.15919

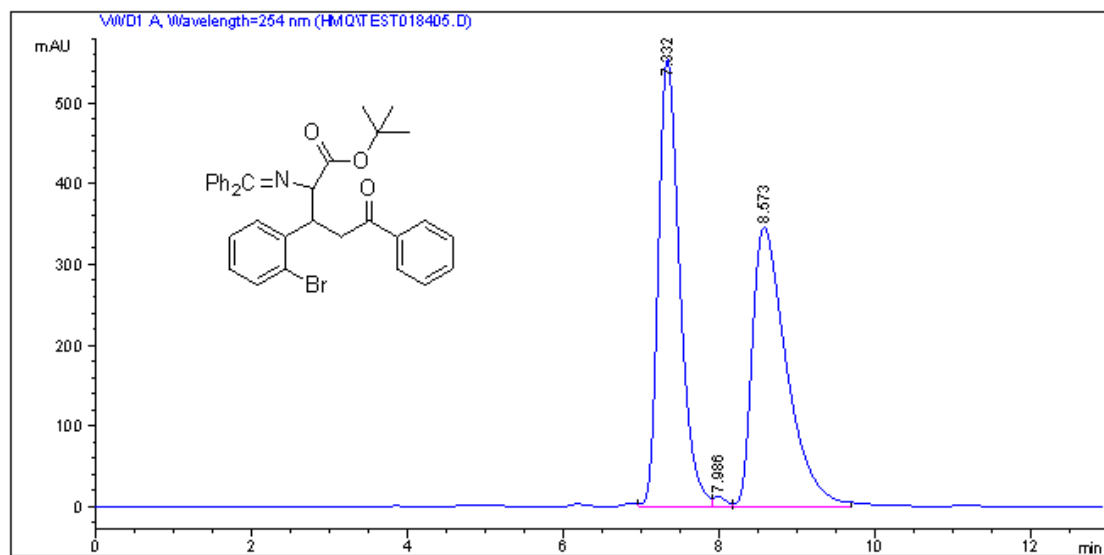

Signal 1: VWD1 A, Wavelength=254 nm

| Peak # | RetTime [min] | Type | Width [min] | Area mAU  | Area %  | Height [mAU] | Area %  |
|--------|---------------|------|-------------|-----------|---------|--------------|---------|
| 1      | 7.332         | VV   | 0.2930      | 1.05947e4 | 49.7068 | 554.08124    | 49.7068 |
| 2      | 7.986         | VV   | 0.1710      | 143.53465 | 0.6734  | 12.30884     | 0.6734  |
| 3      | 8.573         | VBA  | 0.4642      | 1.05761e4 | 49.6198 | 346.19043    | 49.6198 |

Totals : 2.13144e4 912.58050

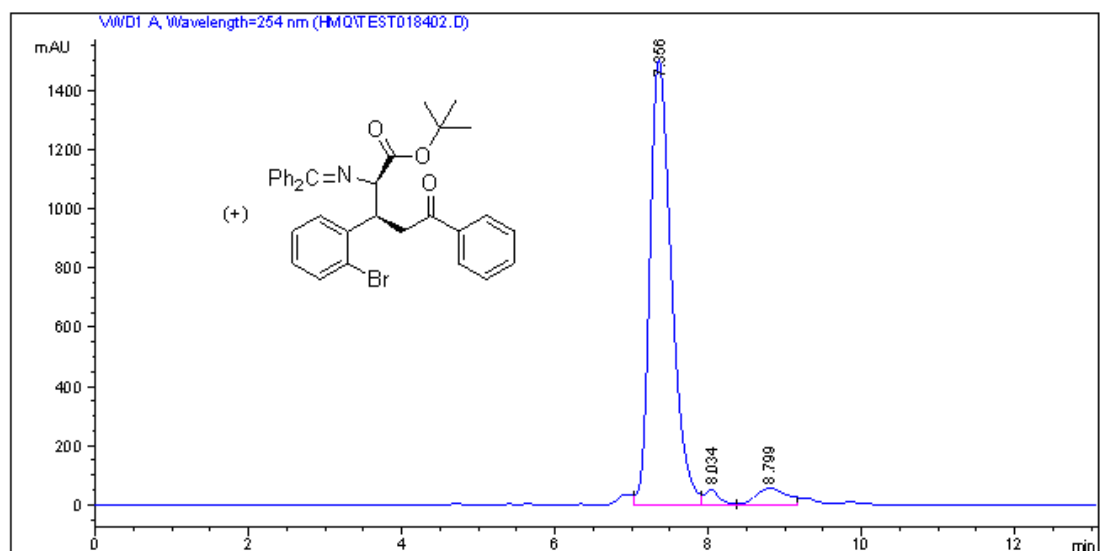

Signal 1: VWD1 A, Wavelength=254 nm

| Peak # | RetTime [min] | Type | Width [min] | Area mAU   | Area %  | Height [mAU] | Area %  |
|--------|---------------|------|-------------|------------|---------|--------------|---------|
| 1      | 7.356         | VV   | 0.2980      | 2.93257e4  | 92.7057 | 1500.04626   | 92.7057 |
| 2      | 8.034         | VV   | 0.1959      | 716.55371  | 2.2652  | 52.88936     | 2.2652  |
| 3      | 8.799         | VBA  | 0.4326      | 1590.85498 | 5.0291  | 56.62020     | 5.0291  |

Totals : 3.16331e4 1609.55583

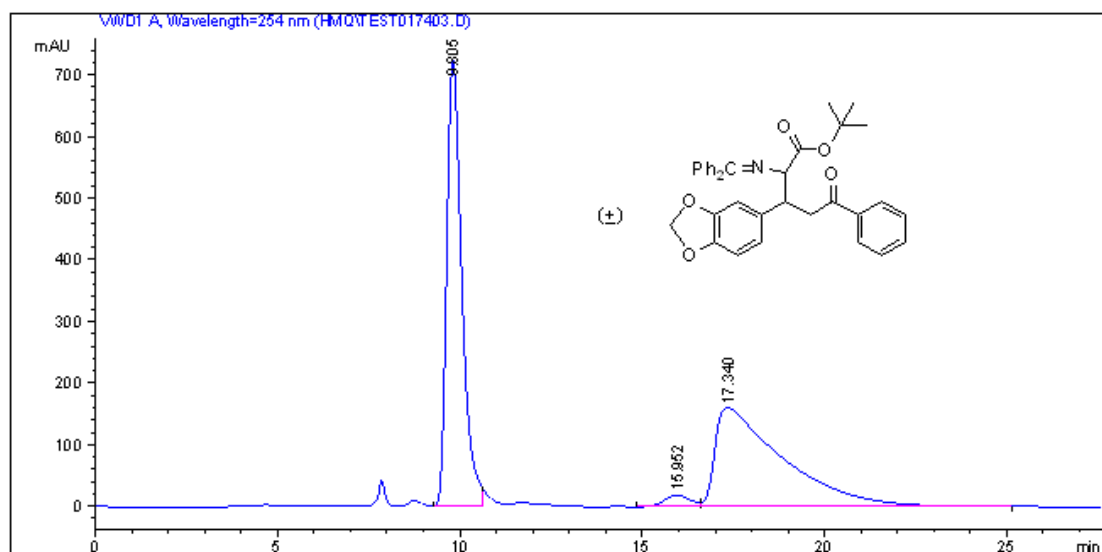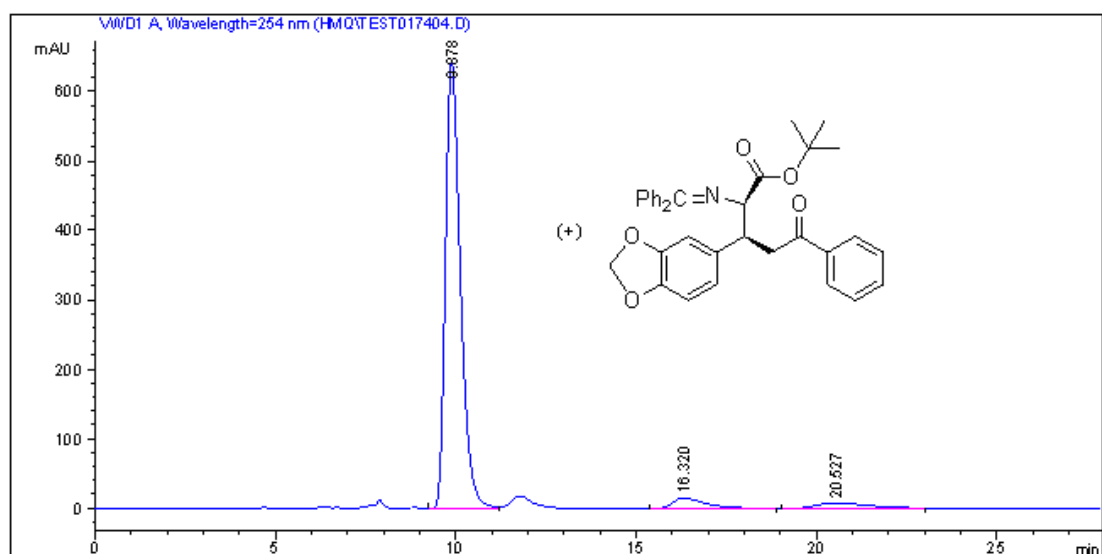

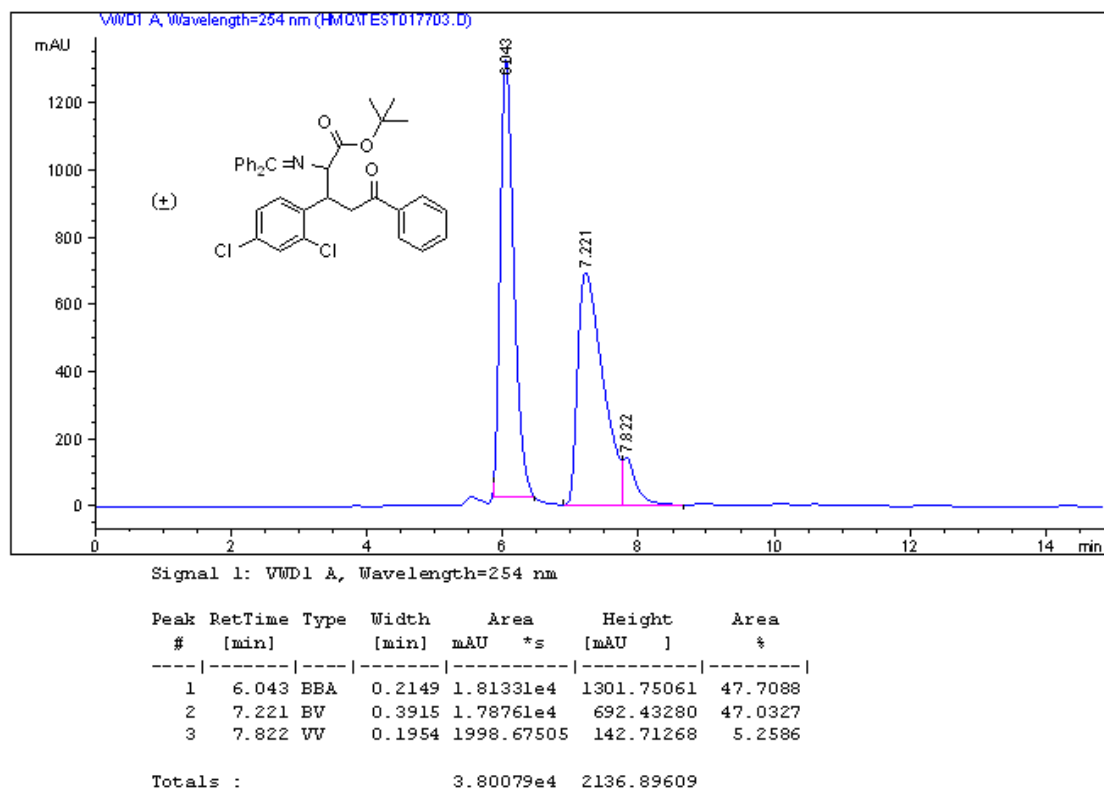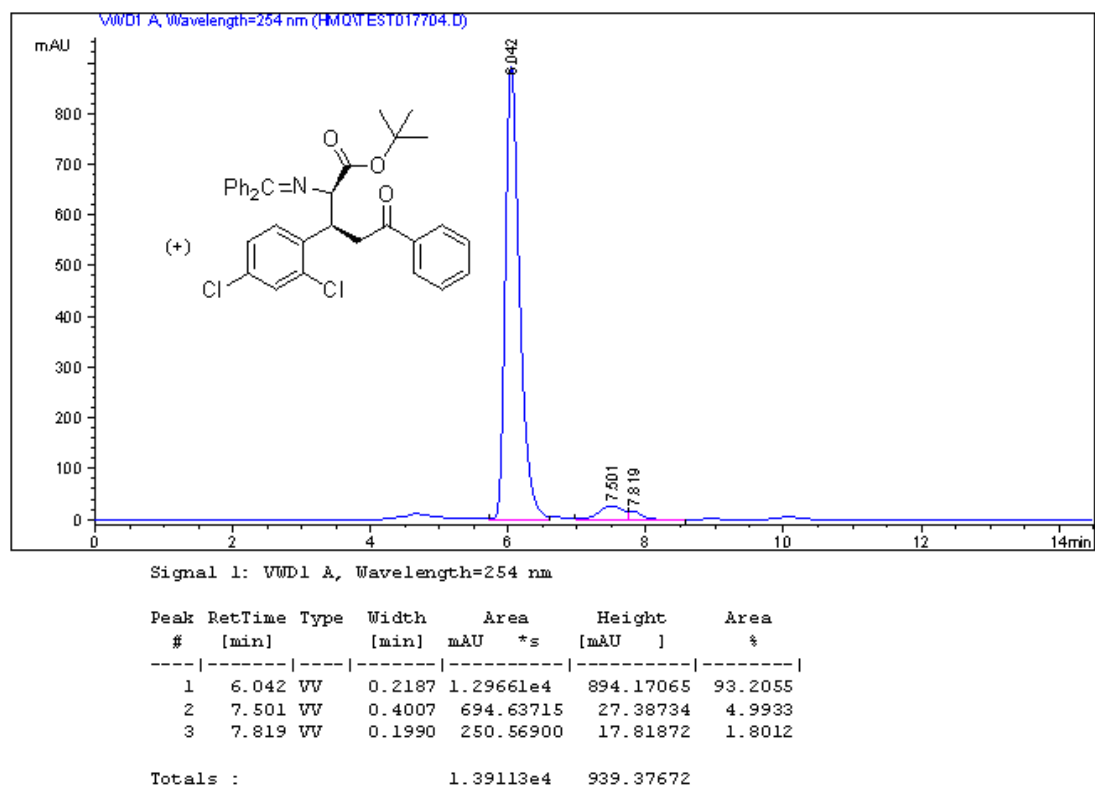

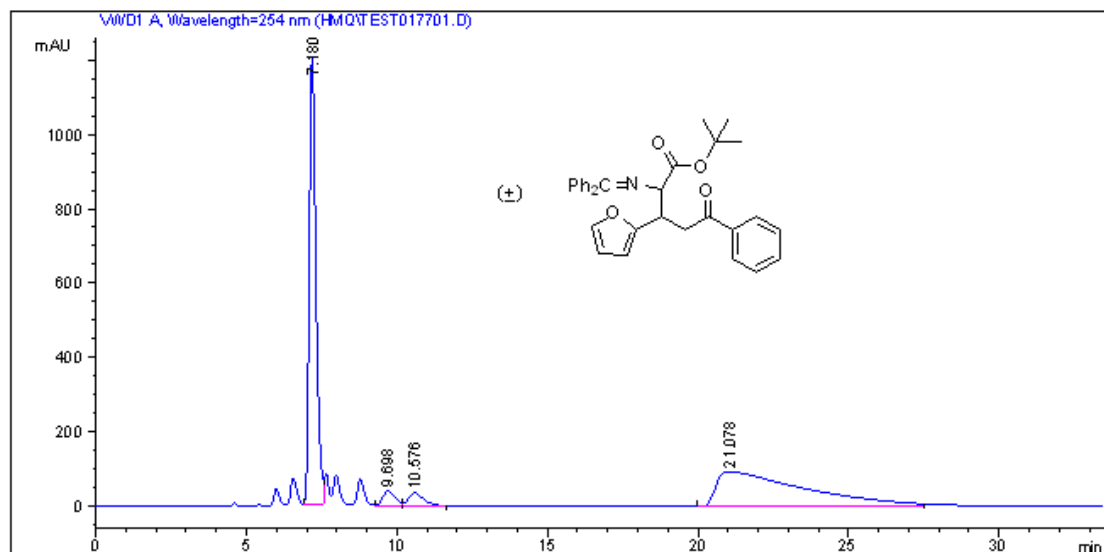

Signal 1: VWD1 A, Wavelength=254 nm

| Peak # | RetTime [min] | Type | Width [min] | Area mAU   | *s | Height [mAU] | Area %  |
|--------|---------------|------|-------------|------------|----|--------------|---------|
| 1      | 7.180         | BV   | 0.2357      | 1.85352e4  |    | 1198.77820   | 46.9936 |
| 2      | 9.698         | VV   | 0.4347      | 1053.33228 |    | 37.59023     | 2.6706  |
| 3      | 10.576        | VV   | 0.5275      | 1182.66675 |    | 34.05288     | 2.9985  |
| 4      | 21.078        | BBA  | 2.7340      | 1.86708e4  |    | 91.34817     | 47.3373 |

Totals : 3.94420e4 1361.76948

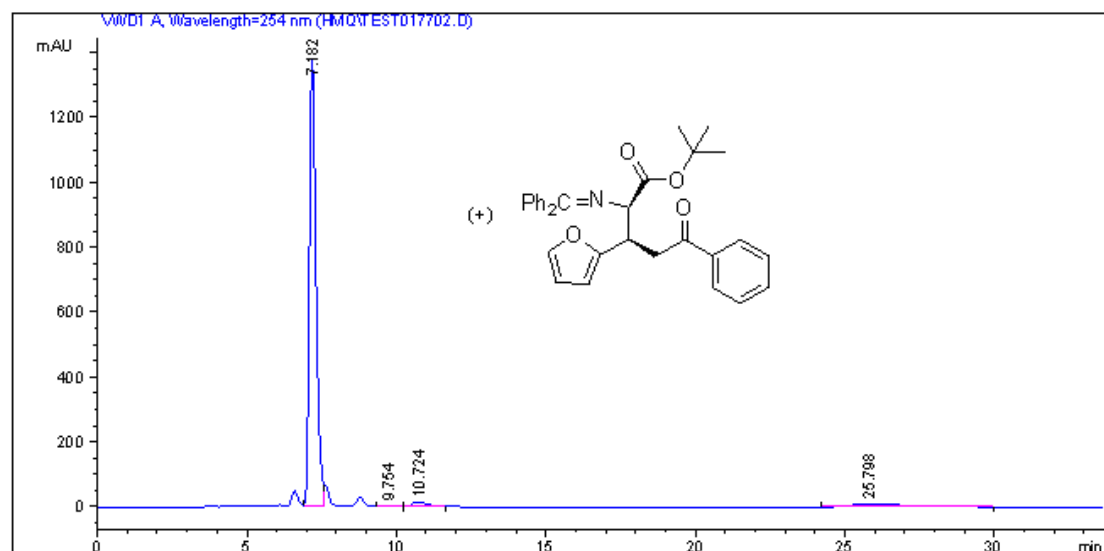

Signal 1: VWD1 A, Wavelength=254 nm

| Peak # | RetTime [min] | Type | Width [min] | Area mAU   | *s | Height [mAU] | Area %  |
|--------|---------------|------|-------------|------------|----|--------------|---------|
| 1      | 7.182         | BV   | 0.2398      | 2.13417e4  |    | 1371.27734   | 92.5832 |
| 2      | 9.754         | BV   | 0.3847      | 51.57313   |    | 2.12762      | 0.2237  |
| 3      | 10.724        | VV   | 0.5275      | 521.52295  |    | 15.12486     | 2.2624  |
| 4      | 25.798        | BB   | 1.7632      | 1136.58972 |    | 8.59979      | 4.9307  |

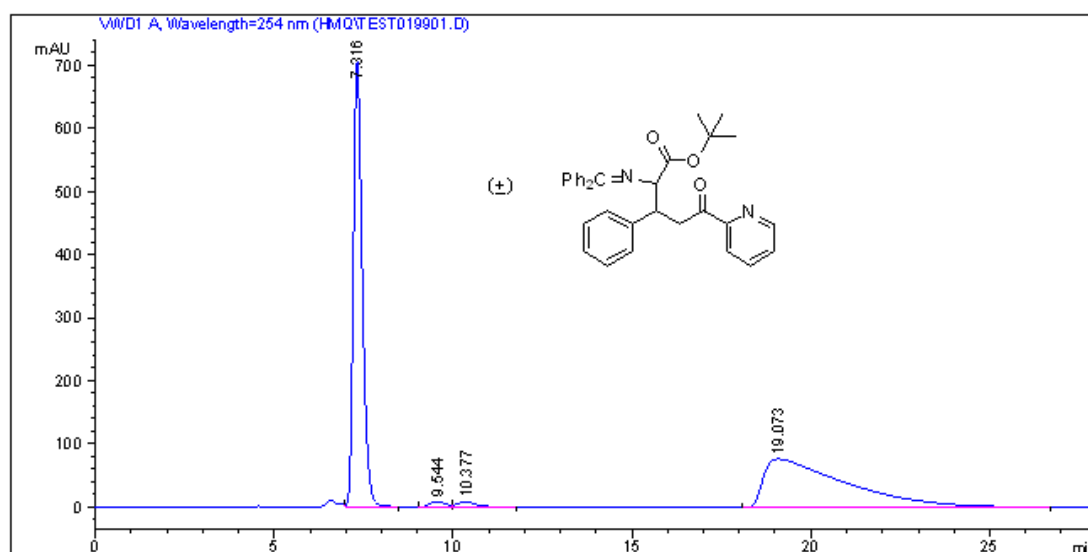

Signal 1: VWD1 A, Wavelength=254 nm

| Peak # | RetTime [min] | Type | Width [min] | Area mAU  | Area %  | Height [mAU] | Area %  |
|--------|---------------|------|-------------|-----------|---------|--------------|---------|
| 1      | 7.316         | VV   | 0.2673      | 1.23028e4 | 49.1220 | 706.23834    | 49.1220 |
| 2      | 9.544         | VV   | 0.4738      | 282.81067 | 1.1292  | 9.23348      | 1.1292  |
| 3      | 10.377        | VB   | 0.5714      | 336.54373 | 1.3437  | 8.68573      | 1.3437  |
| 4      | 19.073        | BB   | 2.1860      | 1.21233e4 | 48.4051 | 76.40735     | 48.4051 |

Totals : 2.50454e4 800.56490

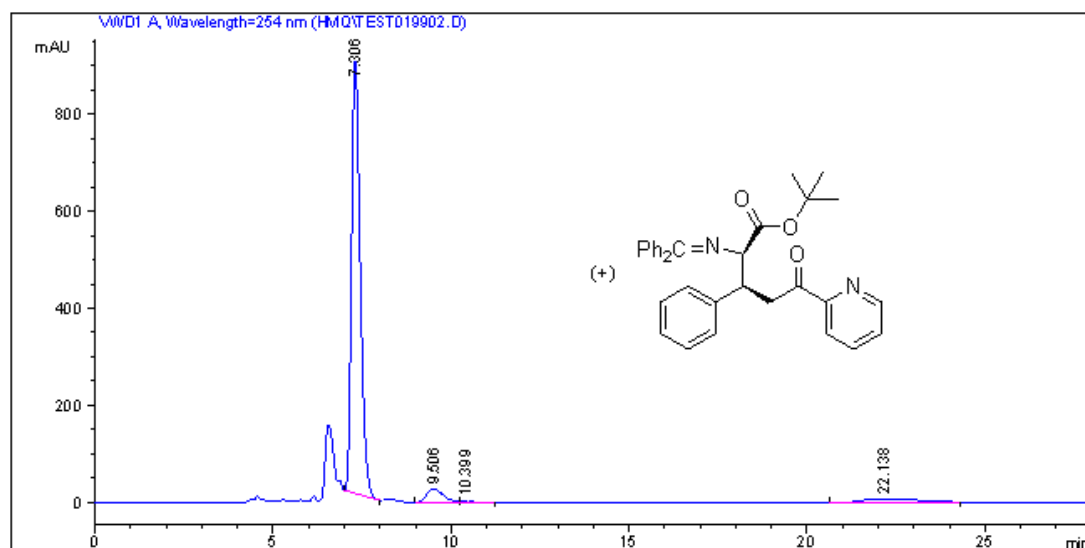

Signal 1: VWD1 A, Wavelength=254 nm

| Peak # | RetTime [min] | Type | Width [min] | Area mAU  | Area %  | Height [mAU] | Area %  |
|--------|---------------|------|-------------|-----------|---------|--------------|---------|
| 1      | 7.306         | VV   | 0.2610      | 1.50860e4 | 88.6019 | 893.59448    | 88.6019 |
| 2      | 9.506         | VV   | 0.5046      | 890.00354 | 5.2271  | 27.37225     | 5.2271  |
| 3      | 10.399        | VV   | 0.3064      | 84.95107  | 0.4989  | 3.90174      | 0.4989  |
| 4      | 22.138        | BBA  | 1.6860      | 965.77838 | 5.6721  | 8.54176      | 5.6721  |

Totals : 1.70268e4 933.41024

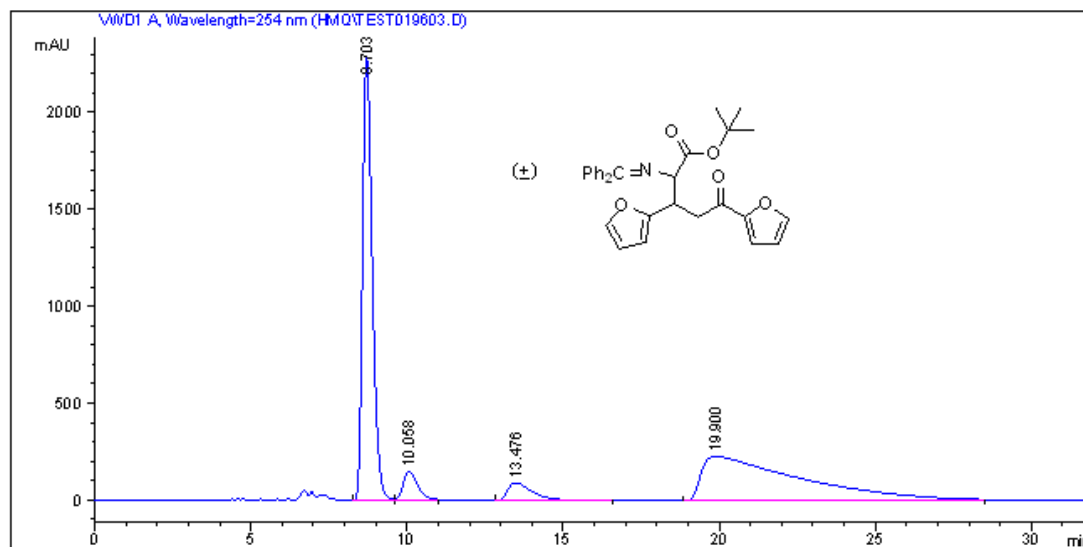

Signal 1: WVD1 A, Wavelength=254 nm

| Peak # | RetTime [min] | Type | Width [min] | Area mAU *s | Height [mAU] | Area %  |
|--------|---------------|------|-------------|-------------|--------------|---------|
| 1      | 8.703         | VV   | 0.3343      | 4.94305e4   | 2281.17285   | 45.5083 |
| 2      | 10.058        | VBA  | 0.4891      | 4853.96924  | 150.80789    | 4.4688  |
| 3      | 13.476        | BB   | 0.8116      | 4841.74854  | 90.34537     | 4.4576  |
| 4      | 19.900        | BBA  | 2.9111      | 4.94926e4   | 224.89774    | 45.5654 |

Totals : 1.08619e5 2747.22385

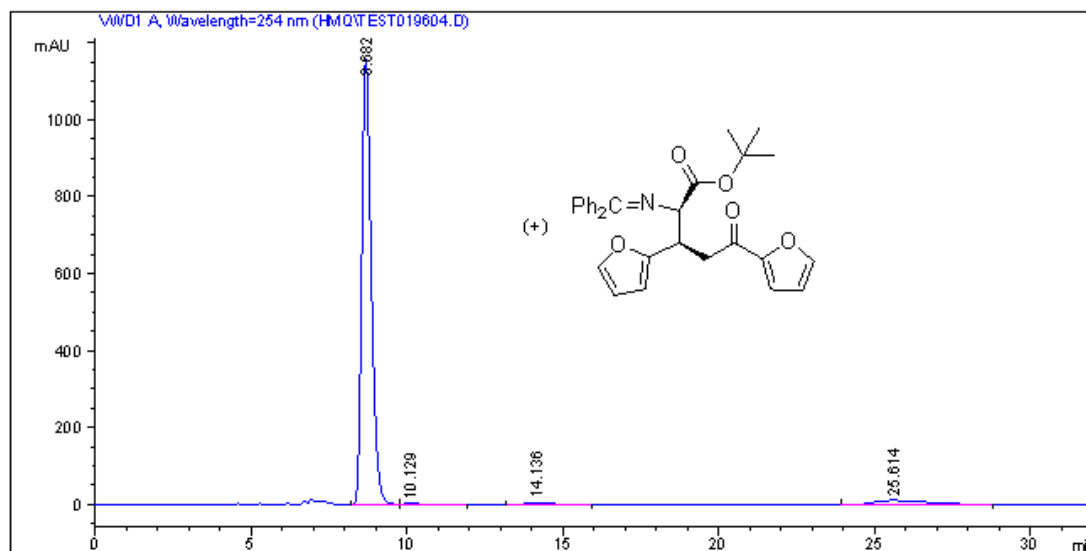

Signal 1: WVD1 A, Wavelength=254 nm

| Peak # | RetTime [min] | Type | Width [min] | Area mAU *s | Height [mAU] | Area %  |
|--------|---------------|------|-------------|-------------|--------------|---------|
| 1      | 8.682         | BV   | 0.3264      | 2.46013e4   | 1158.18677   | 92.8335 |
| 2      | 10.129        | VB   | 0.5809      | 132.27531   | 3.28140      | 0.4991  |
| 3      | 14.136        | BB   | 0.8257      | 333.77219   | 6.06288      | 1.2595  |
| 4      | 25.614        | BBA  | 1.8900      | 1433.11682  | 11.25727     | 5.4079  |

Totals : 2.65004e4 1178.78832

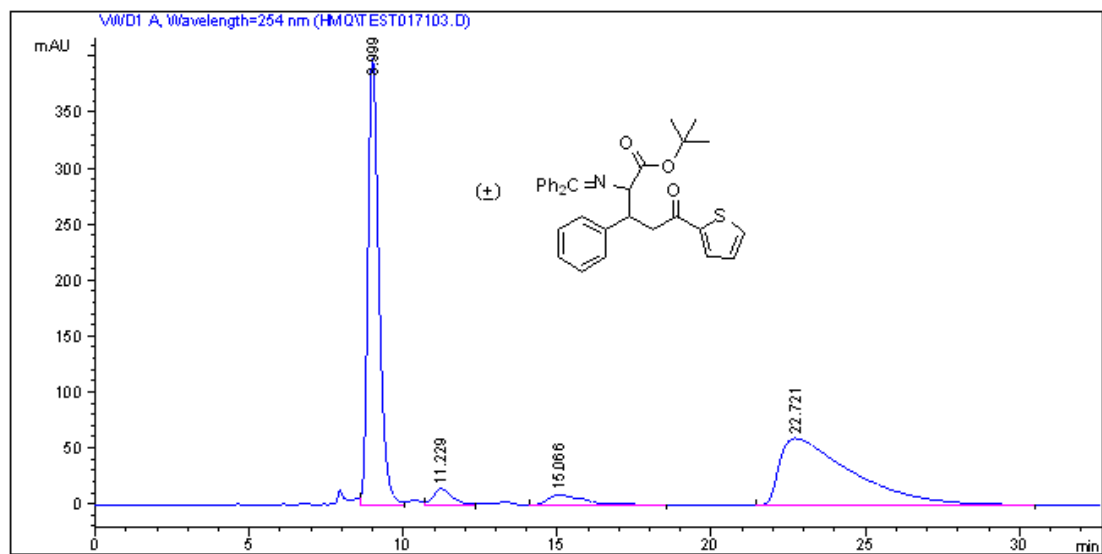

| Peak #   | RetTime [min] | Type | Width [min] | Area mAU *s | Height [mAU] | Area %  |
|----------|---------------|------|-------------|-------------|--------------|---------|
| 1        | 8.999         | BV   | 0.3803      | 9908.89551  | 398.56277    | 47.0058 |
| 2        | 11.229        | VV   | 0.6498      | 638.13483   | 14.68166     | 3.0272  |
| 3        | 15.066        | VB   | 1.1763      | 797.85291   | 9.40262      | 3.7849  |
| 4        | 22.721        | BB   | 2.2528      | 9735.26465  | 59.67287     | 46.1821 |
| Totals : |               |      |             | 2.10801e4   | 482.31992    |         |

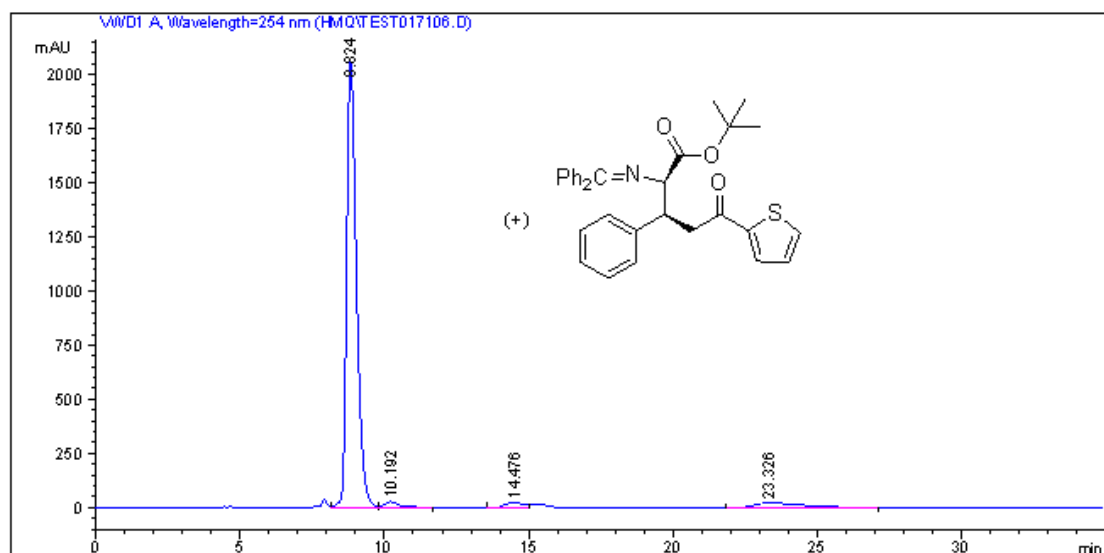

| Peak #   | RetTime [min] | Type | Width [min] | Area mAU *s | Height [mAU] | Area %  |
|----------|---------------|------|-------------|-------------|--------------|---------|
| 1        | 8.824         | VV   | 0.3610      | 4.89067e4   | 2063.07080   | 90.7641 |
| 2        | 10.192        | VV   | 0.5525      | 1080.23364  | 28.15181     | 2.0048  |
| 3        | 14.476        | VV   | 0.7327      | 1096.55347  | 23.29380     | 2.0351  |
| 4        | 23.326        | BBA  | 1.8175      | 2799.79590  | 22.16162     | 5.1960  |
| Totals : |               |      |             | 5.38832e4   | 2136.67803   |         |



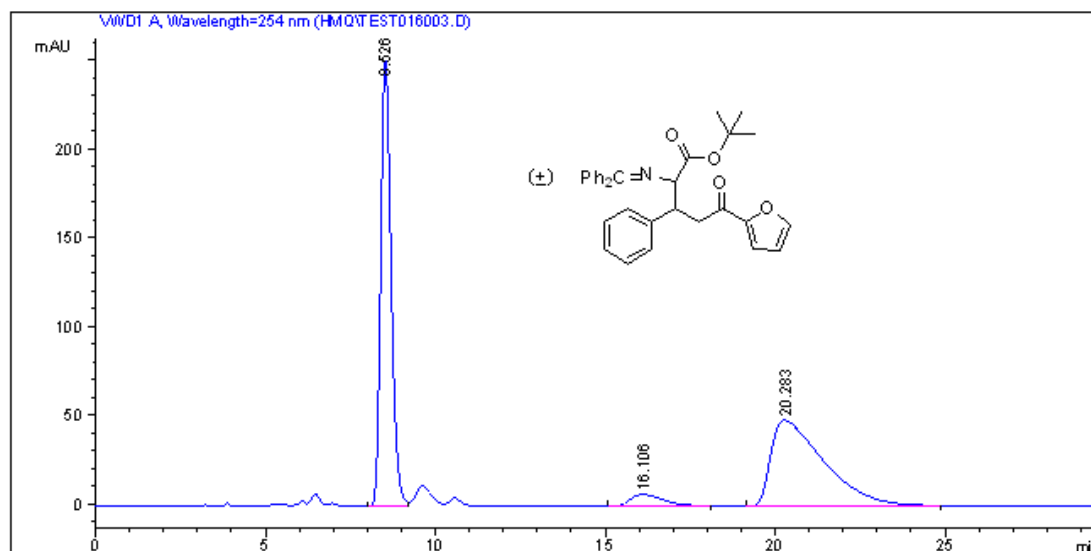

Signal 1: VWD1 A, Wavelength=254 nm

| Peak # | RetTime [min] | Type | Width [min] | Area mAU *s | Height [mAU] | Area %  |
|--------|---------------|------|-------------|-------------|--------------|---------|
| 1      | 8.526         | VV   | 0.3266      | 5345.30664  | 251.46826    | 48.5425 |
| 2      | 16.106        | BB   | 1.0494      | 428.07056   | 6.34285      | 3.8875  |
| 3      | 20.283        | BB   | 1.5454      | 5238.21436  | 48.27937     | 47.5700 |

Totals : 1.10116e4 306.09047

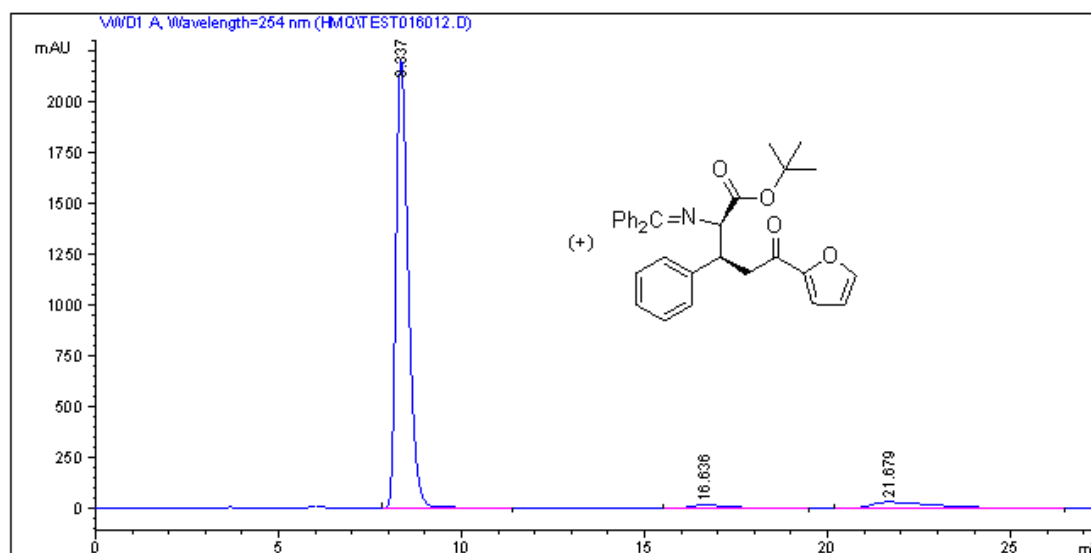

Signal 1: VWD1 A, Wavelength=254 nm

| Peak # | RetTime [min] | Type | Width [min] | Area mAU *s | Height [mAU] | Area %  |
|--------|---------------|------|-------------|-------------|--------------|---------|
| 1      | 8.337         | VB   | 0.3581      | 5.16925e4   | 2203.83447   | 91.5991 |
| 2      | 16.636        | BB   | 1.1188      | 1159.09021  | 15.62423     | 2.0539  |
| 3      | 21.679        | BB   | 1.7447      | 3581.83105  | 29.76369     | 6.3470  |

Totals : 5.64335e4 2249.22239

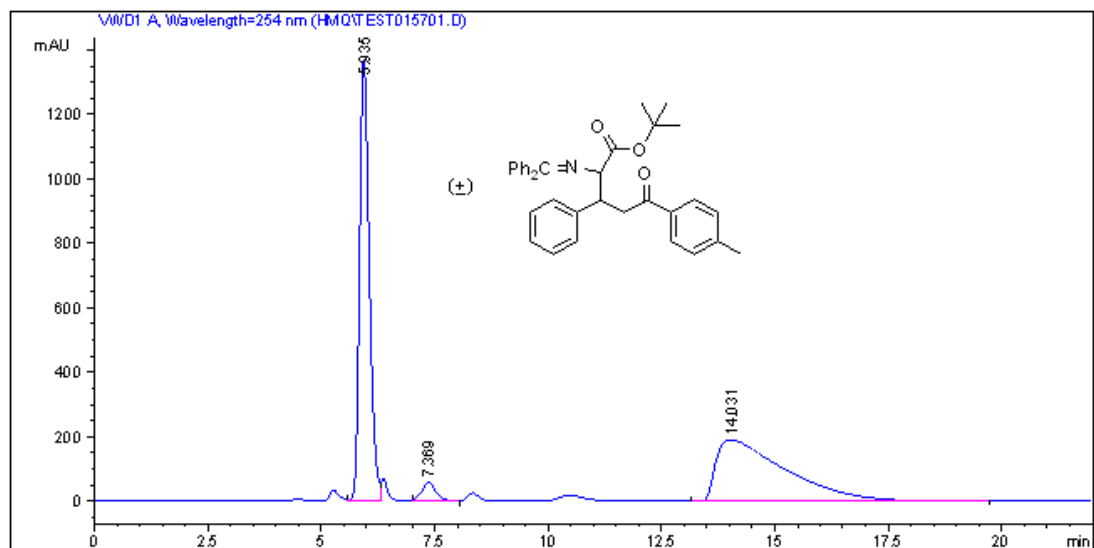

Signal 1: VWD1 A, Wavelength=254 nm

| Peak # | RetTime [min] | Type | Width [min] | Area mAU   | Area %  | Height [mAU] |
|--------|---------------|------|-------------|------------|---------|--------------|
| 1      | 5.935         | VV   | 0.2298      | 2.05134e4  | 48.5980 | 1371.86792   |
| 2      | 7.369         | BV   | 0.3194      | 1304.91895 | 3.0915  | 59.62043     |
| 3      | 14.031        | BB   | 1.5266      | 2.03920e4  | 48.3105 | 190.77527    |

Totals : 4.22103e4 1622.26362

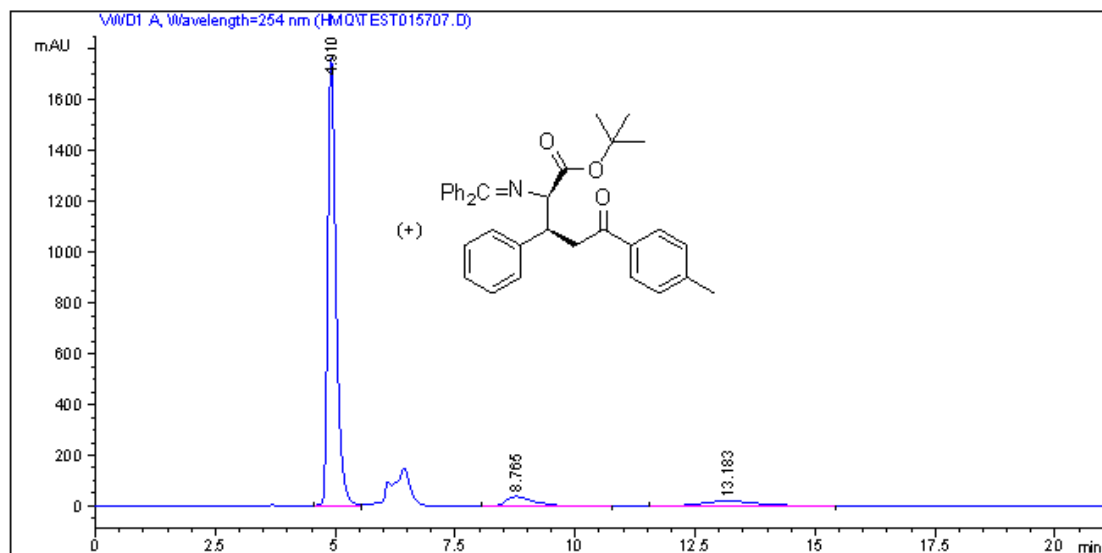

Signal 1: VWD1 A, Wavelength=254 nm

| Peak # | RetTime [min] | Type | Width [min] | Area mAU   | Area %  | Height [mAU] |
|--------|---------------|------|-------------|------------|---------|--------------|
| 1      | 4.910         | VV   | 0.1811      | 2.12029e4  | 87.7563 | 1763.24304   |
| 2      | 8.765         | BB   | 0.6028      | 1500.90002 | 6.2121  | 37.34822     |
| 3      | 13.183        | BB   | 1.2217      | 1457.30127 | 6.0316  | 18.15881     |

Totals : 2.41611e4 1818.75007

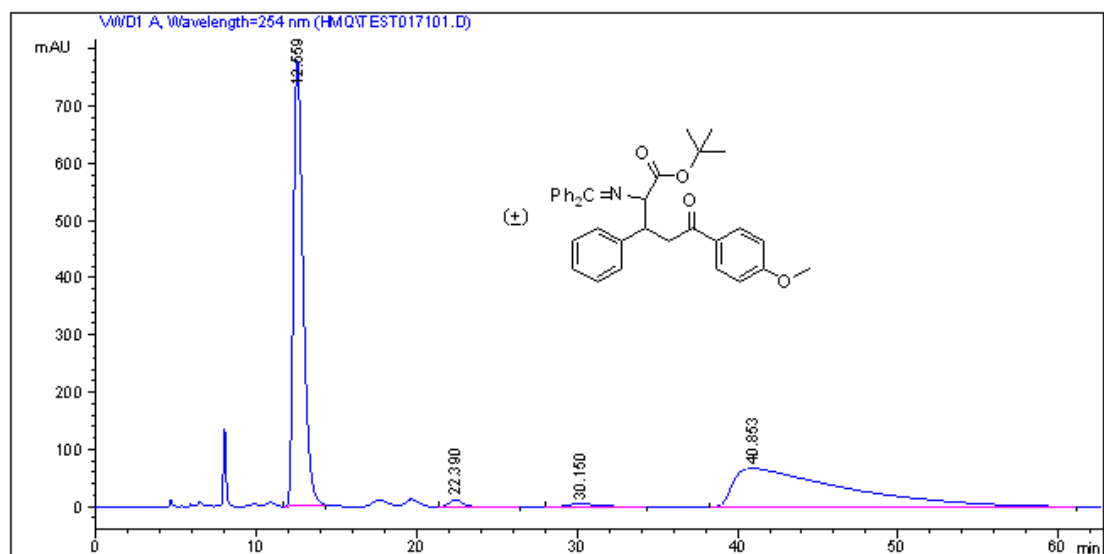

Signal 1: VWD1 A, Wavelength=254 nm

| Peak # | RetTime [min] | Type | Width [min] | Area mAU *s | Height [mAU] | Area %  |
|--------|---------------|------|-------------|-------------|--------------|---------|
| 1      | 12.559        | VBA  | 0.6386      | 3.25142e4   | 778.68781    | 49.0169 |
| 2      | 22.390        | VB   | 0.8951      | 706.59784   | 12.18184     | 1.0652  |
| 3      | 30.150        | BB   | 1.8707      | 812.83490   | 5.30881      | 1.2254  |
| 4      | 40.853        | EB   | 6.0140      | 3.22991e4   | 67.31870     | 48.6925 |

Totals : 6.63327e4 863.49714

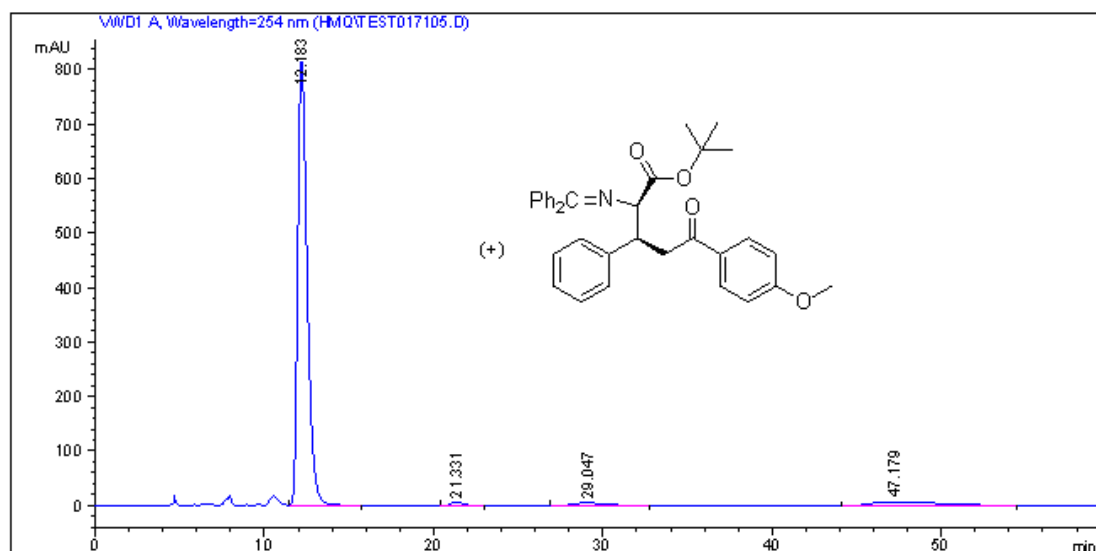

Signal 1: VWD1 A, Wavelength=254 nm

| Peak # | RetTime [min] | Type | Width [min] | Area mAU *s | Height [mAU] | Area %  |
|--------|---------------|------|-------------|-------------|--------------|---------|
| 1      | 12.183        | BB   | 0.5951      | 3.16697e4   | 816.69629    | 90.6911 |
| 2      | 21.331        | BB   | 0.8220      | 330.89316   | 6.04581      | 0.9476  |
| 3      | 29.047        | BB   | 1.7289      | 713.80933   | 5.01983      | 2.0441  |
| 4      | 47.179        | BBA  | 3.3952      | 2205.99658  | 7.67909      | 6.3172  |

Totals : 3.49204e4 835.44102

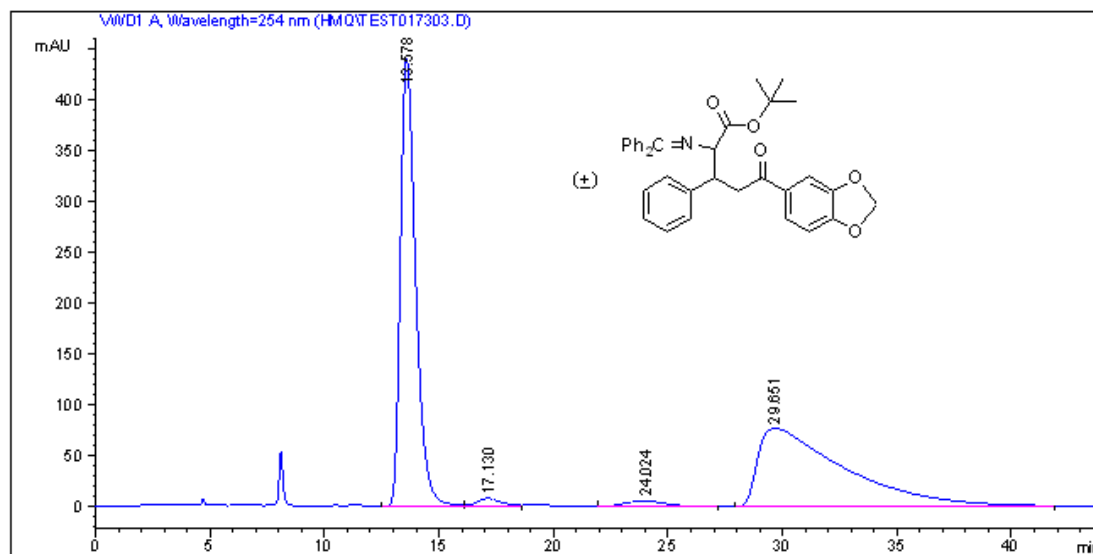

| Peak #   | RetTime [min] | Type | Width [min] | Area mAU *s | Height [mAU] | Area %  |
|----------|---------------|------|-------------|-------------|--------------|---------|
| 1        | 13.578        | BV   | 0.7094      | 2.03767e4   | 439.83020    | 49.1446 |
| 2        | 17.130        | VV   | 1.1211      | 565.24677   | 7.59993      | 1.3633  |
| 3        | 24.024        | BB   | 1.4466      | 611.12427   | 5.22308      | 1.4739  |
| 4        | 29.651        | BB   | 3.4471      | 1.99097e4   | 76.49599     | 48.0182 |
| Totals : |               |      |             | 4.14628e4   | 529.14920    |         |

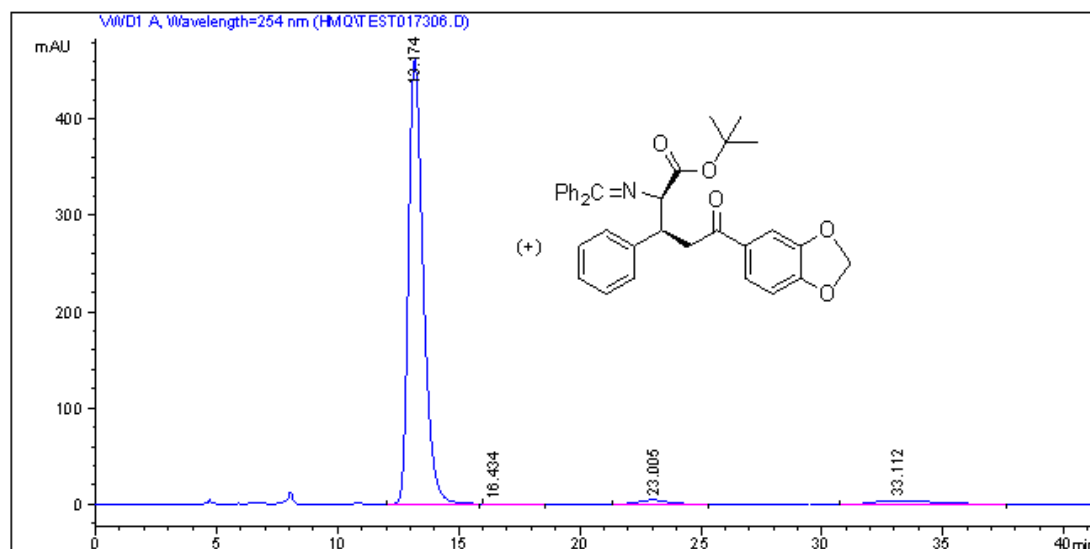

| Peak #   | RetTime [min] | Type | Width [min] | Area mAU *s | Height [mAU] | Area %  |
|----------|---------------|------|-------------|-------------|--------------|---------|
| 1        | 13.174        | BB   | 0.6499      | 1.96294e4   | 462.12119    | 94.3795 |
| 2        | 16.434        | BB   | 0.8638      | 48.75469    | 6.76776e-1   | 0.2344  |
| 3        | 23.005        | BB   | 1.1504      | 399.68509   | 4.52266      | 1.9217  |
| 4        | 33.112        | BB   | 2.0397      | 720.54321   | 4.13916      | 3.4644  |
| Totals : |               |      |             | 2.07984e4   | 471.45978    |         |

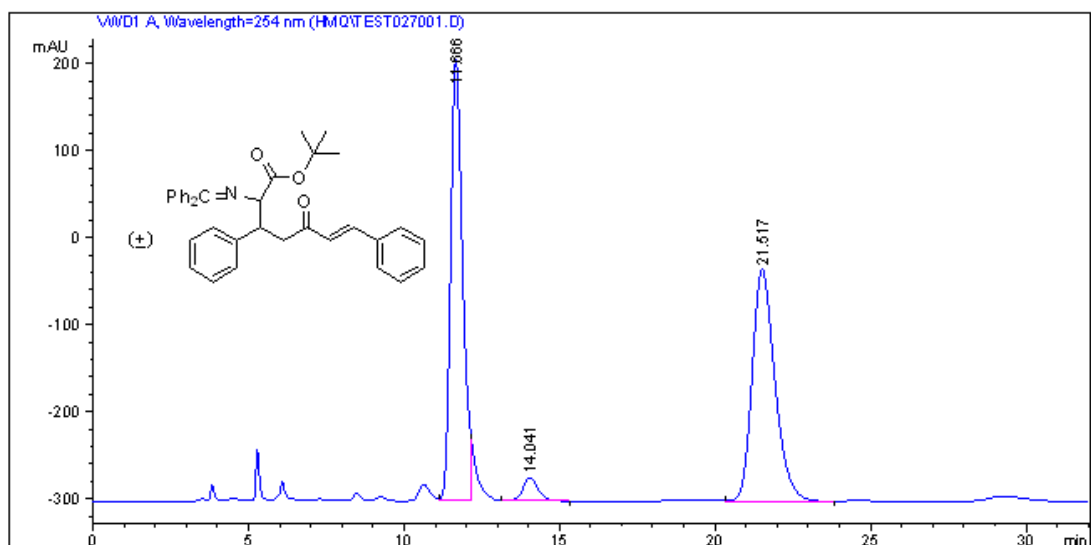

Signal 1: VWD1 A, Wavelength=254 nm

| Peak # | RetTime [min] | Type | Width [min] | Area mAU *s | Height [mAU] | Area %  |
|--------|---------------|------|-------------|-------------|--------------|---------|
| 1      | 11.666        | VBA  | 0.4080      | 1.35432e4   | 506.61539    | 48.5050 |
| 2      | 14.041        | BB   | 0.5088      | 881.58838   | 26.40933     | 3.1574  |
| 3      | 21.517        | VB   | 0.7762      | 1.34964e4   | 265.65402    | 48.3376 |

Totals : 2.79212e4 798.67874

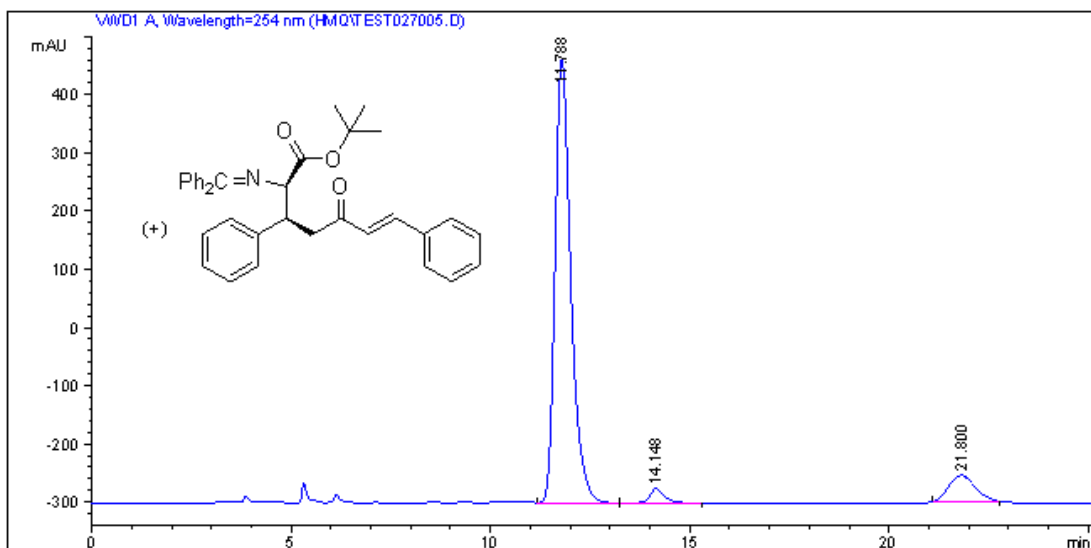

Signal 1: VWD1 A, Wavelength=254 nm

| Peak # | RetTime [min] | Type | Width [min] | Area mAU *s | Height [mAU] | Area %  |
|--------|---------------|------|-------------|-------------|--------------|---------|
| 1      | 11.788        | VV   | 0.4160      | 2.09275e4   | 763.16248    | 88.6798 |
| 2      | 14.148        | VB   | 0.3554      | 598.62341   | 24.46507     | 2.5367  |
| 3      | 21.800        | BBA  | 0.7233      | 2072.82446  | 44.79878     | 8.7835  |

Totals : 2.35990e4 832.42632

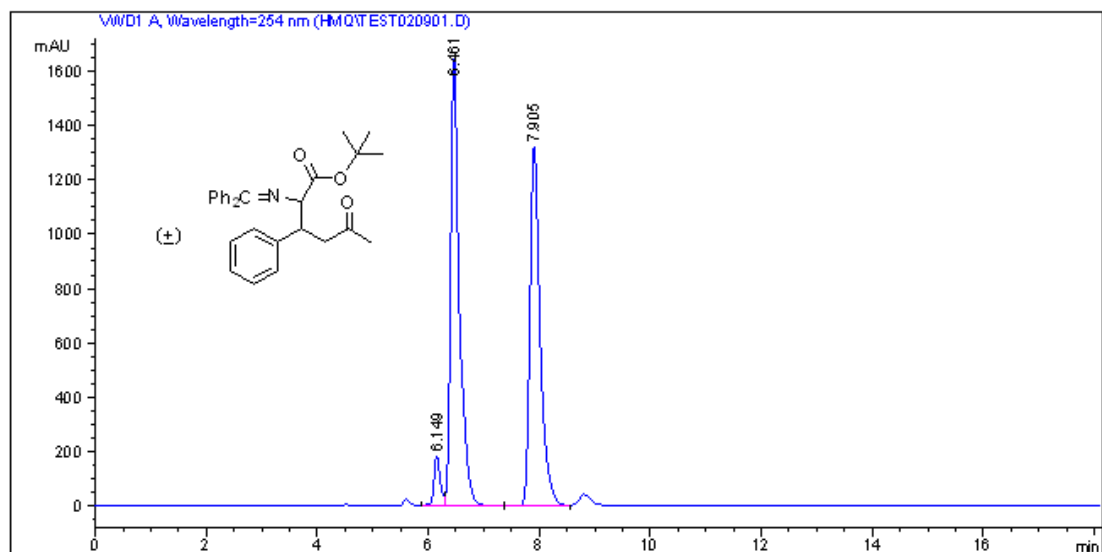

Signal 1: VWD1 A, Wavelength=254 nm

| Peak # | RetTime [min] | Type | Width [min] | Area mAU   | Area %  | Height [mAU] | Area %  |
|--------|---------------|------|-------------|------------|---------|--------------|---------|
| 1      | 6.149         | VV   | 0.1177      | 1440.97473 | 4.0386  | 183.82474    | 4.0386  |
| 2      | 6.461         | VBA  | 0.1547      | 1.73088e4  | 48.5112 | 1645.54785   | 48.5112 |
| 3      | 7.905         | BV   | 0.1929      | 1.69302e4  | 47.4502 | 1324.11755   | 47.4502 |

Totals : 3.56800e4 3153.49014

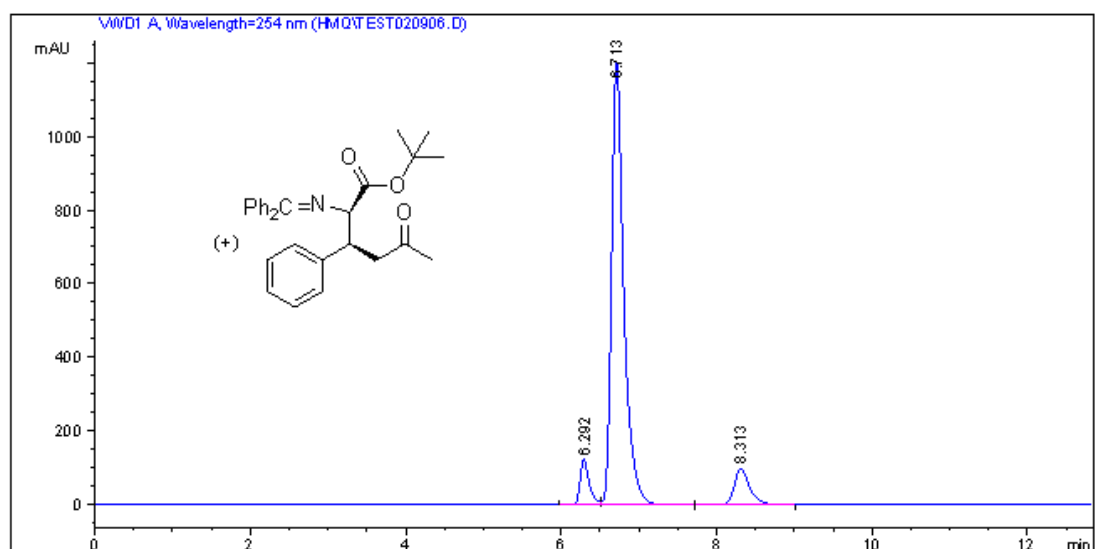

Signal 1: VWD1 A, Wavelength=254 nm

| Peak # | RetTime [min] | Type | Width [min] | Area mAU   | Area %  | Height [mAU] | Area %  |
|--------|---------------|------|-------------|------------|---------|--------------|---------|
| 1      | 6.292         | VV   | 0.1225      | 1013.97980 | 6.5030  | 122.90707    | 6.5030  |
| 2      | 6.713         | VV   | 0.1659      | 1.31918e4  | 84.6039 | 1202.25427   | 84.6039 |
| 3      | 8.313         | VV   | 0.2086      | 1386.64221 | 8.8930  | 99.87807     | 8.8930  |

Totals : 1.55924e4 1425.03941

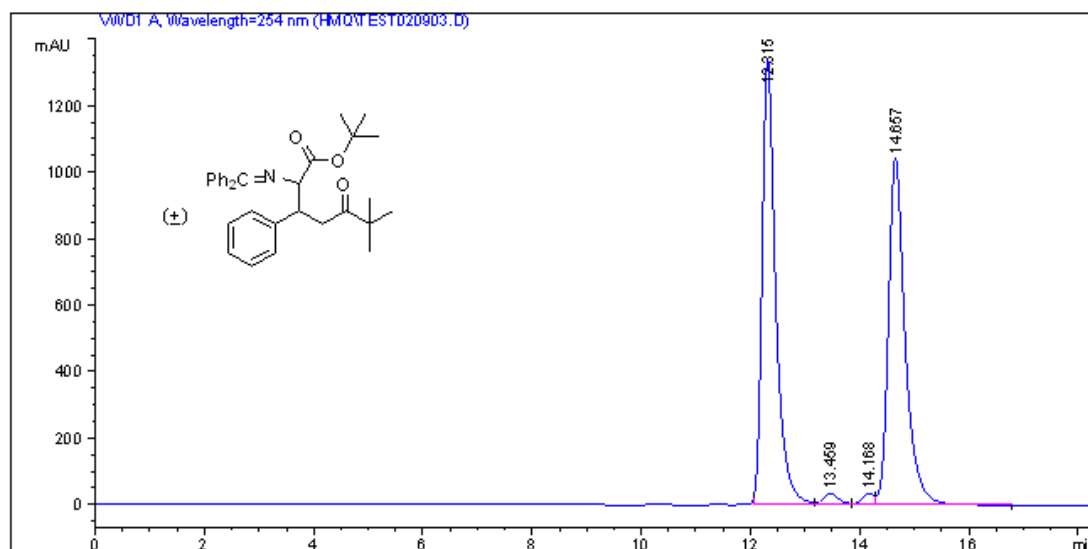

Signal 1: VWD1 A, Wavelength=254 nm

| Peak # | RetTime [min] | Type | Width [min] | Area mAU  | Area *s    | Height [mAU] | Area % |
|--------|---------------|------|-------------|-----------|------------|--------------|--------|
| 1      | 12.315        | BV   | 0.2606      | 2.32282e4 | 1338.97925 | 49.6715      |        |
| 2      | 13.459        | VV   | 0.3058      | 735.27258 | 35.92561   | 1.5723       |        |
| 3      | 14.168        | VV   | 0.2365      | 558.10199 | 35.93771   | 1.1935       |        |
| 4      | 14.657        | VB   | 0.3189      | 2.22421e4 | 1042.24854 | 47.5628      |        |

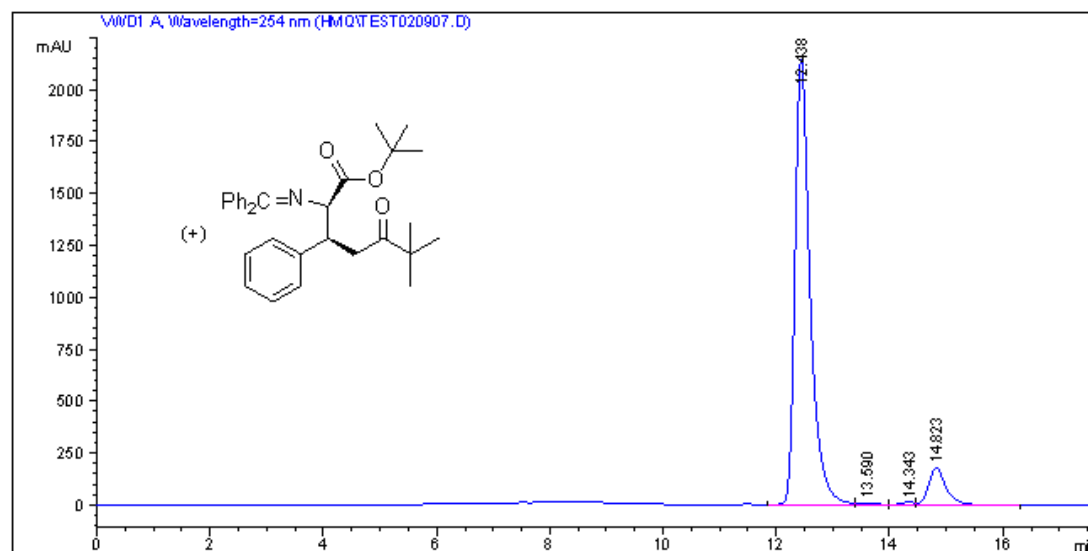

Signal 1: VWD1 A, Wavelength=254 nm

| Peak # | RetTime [min] | Type | Width [min] | Area mAU   | Area *s    | Height [mAU] | Area % |
|--------|---------------|------|-------------|------------|------------|--------------|--------|
| 1      | 12.438        | VV   | 0.2782      | 3.99024e4  | 2144.39429 | 90.1626      |        |
| 2      | 13.590        | VV   | 0.3146      | 234.40588  | 11.04586   | 0.5297       |        |
| 3      | 14.343        | VV   | 0.2598      | 231.27678  | 13.38842   | 0.5226       |        |
| 4      | 14.823        | VB   | 0.3238      | 3887.95166 | 178.61230  | 8.7851       |        |

Totals : 4.42560e4 2347.44087

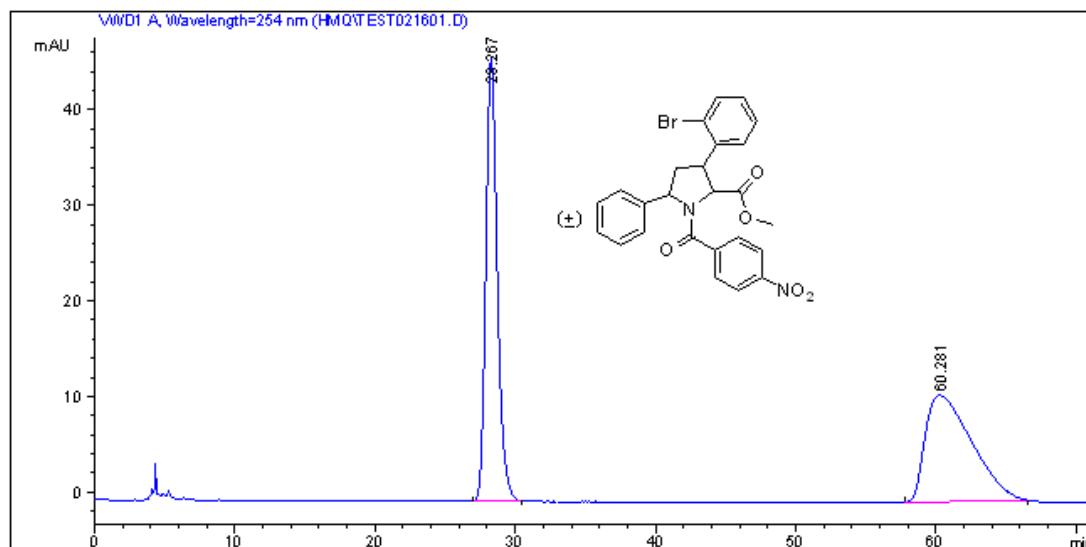

Signal 1: VWD1 A, Wavelength=254 nm

| Peak # | RetTime [min] | Type | Width [min] | Area mAU   | Area %   | Height [mAU] | Area % |
|--------|---------------|------|-------------|------------|----------|--------------|--------|
| 1      | 28.267        | BB   | 0.8654      | 2626.07764 | 46.31041 | 50.4529      |        |
| 2      | 60.281        | BB   | 2.7277      | 2578.92725 | 11.14938 | 49.5471      |        |

Totals : 5205.00488 57.45979

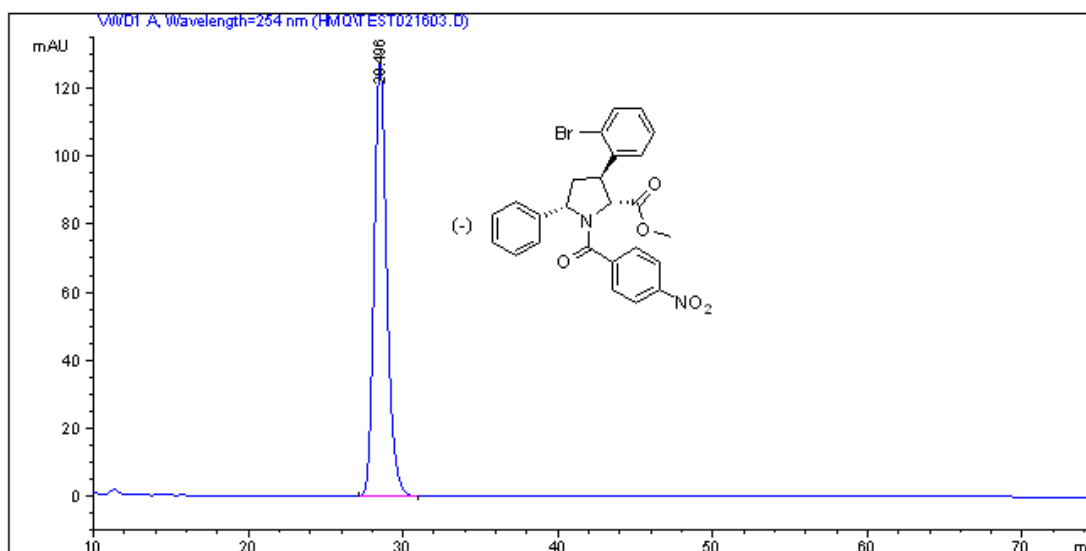

Signal 1: VWD1 A, Wavelength=254 nm

| Peak # | RetTime [min] | Type | Width [min] | Area mAU   | Area %    | Height [mAU] | Area % |
|--------|---------------|------|-------------|------------|-----------|--------------|--------|
| 1      | 28.496        | BB   | 0.8677      | 7275.03906 | 127.84914 | 100.0000     |        |

Totals : 7275.03906 127.84914



## 9. X-Ray Analysis for the Amino Acid **16**

CCDC 742621 contains the supplementary crystallographic data for the product **16**.

These data can be obtained free of charge from The Cambridge Crystallographic Data Center via [www.ccdc.cam.ac.uk/data\\_request/cif](http://www.ccdc.cam.ac.uk/data_request/cif).

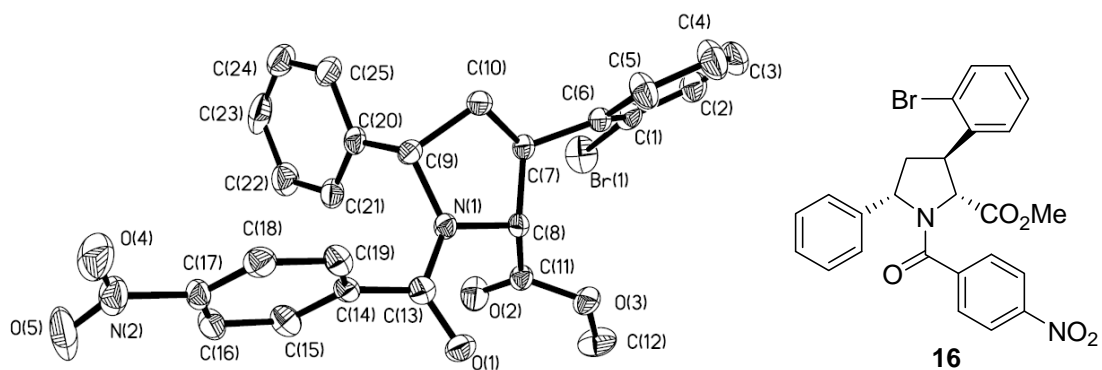

Supplement: c0cc04321d.pdf [file c0cc04321d.pdf]
